# Supplementary material
Source: publisher figshare collection journal article supplement (https://acs.figshare.com/ndownloader/files/3853408)

# Supporting Information

## Table of Contents

|                            |    |
|----------------------------|----|
| Analytical methods         | 1  |
| Data in Table 1, with HP-1 | 2  |
| Data in Table 1, with HP-3 | 19 |
| Data in Table 1, with HP-4 | 29 |
| Data in Table 2            | 44 |
| Data in Table 3            | 61 |
| Data in Scheme 3           | 95 |

## Analytical Methods

On-DNA reactions were analyzed by LCMS. Samples (ca. 100 pmol) were injected onto a reverse-phase chromatography column (Targa C18, 5 $\mu$ , 2.1 x 40 mm) and eluted (15 – 70% solvent B over 7 minutes, 0.36 mL/min flow rate, 10-60% solvent B over 3 minutes, 0.55 mL/min flow rate, or 10-90% solvent B over 1 minutes, 1 mL/min flow rate ; Solvent A: 0.75% hexafluoroisopropanol (HFIP) / 0.38% triethylammonium acetate /10  $\mu$ M EDTA in deionized water; Solvent B: 0.75% HFIP/0.38% TEAA/10  $\mu$ M EDTA in 90/10 methanol/water) with monitoring at 260 nm. Effluent was analyzed on a ThermoFinnigan Advantage electrospray mass spectrometer in negative ion mode. When necessary, mass deconvolution was achieved using ProMass software (Novatia). Chromatographic purification was likewise achieved using reverse-phase liquid chromatography (Gemini C18 5 $\mu$ , 30 x 100 mm; Solvent A: pH 7.5 50 mM triethylammonium acetate; Solvent B: 1% water in acetonitrile).

Yields were calculated by examination of the UV and TIC traces of the LCMS chromatograms.

**Materials.** All the reagents were purchased through vendors. They were dissolved in an appropriate solvent before use. DNA headpiece (**HP**) (5'-/5Phos/GAGTCA/iSp9/iUniAmM/iSp9/TGACTCCC-3') was obtained from Biosearch Technologies, Novato, CA.

**“Headpiece (HP).”** Sequence: 5’-/5Phos/GAGTCA/iSp9/iUniAmM/iSp9/TGACTCCC-3’

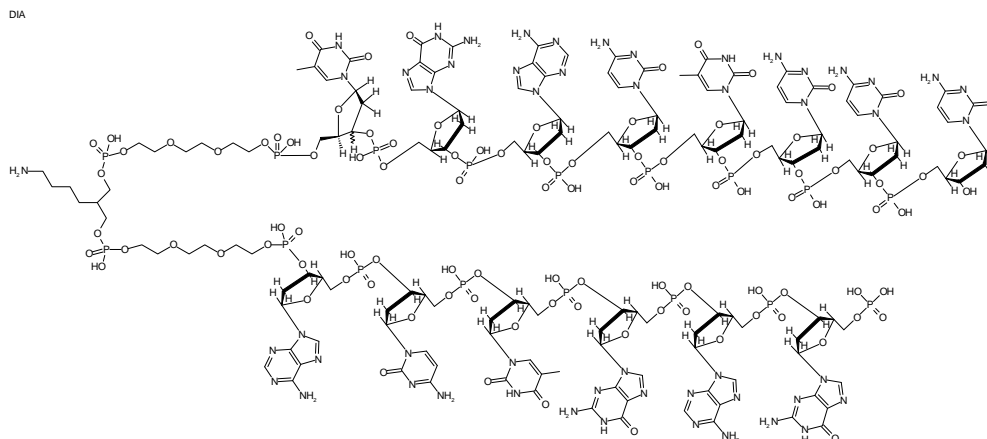

Figure 1. Sequence and structure of the “headpiece.” MW = 4937 D

### Preparation of **HP-1**

A solution of HP in pH9.4 borate buffer (250 mM) (1  $\mu$ mol, 350  $\mu$ L) was added at cold 40 equivalents of 4-iodo benzoic acid (9.92 mg in 70  $\mu$ L of DMF), followed by 40 equivalents of DMT-MM (10.9 mg in 70  $\mu$ L of water). After being kept at cold for 10 minutes, the reaction was allowed to proceed at room temperature overnight. The reaction was precipitated by adding 10% 5N NaCl water solution and 2.5 times volume of absolute EtOH. The pellet was redissolved in water (400  $\mu$ L), followed by adding piperidine (60  $\mu$ L). The reaction was allowed to proceed at room temperature for a couple hours. The headpiece was precipitated by treating with EtOH, which will be used directly for the next step without further purification.

**HP-1:** expected mass 5167.20 (M-3/3=1721.40), observed 5166.18 (M-3/3=1721.06).

In the MS traces, especially in the -5 and -6 charge states, hexafluoroisopropanol (HFIP) adducts (expected mass of HFIP 168, observed +167) were observed. HFIP was a component of the solvents used in the LCMS.

The HFIP adducts were also observed in other samples’ LCMS chromatograms.

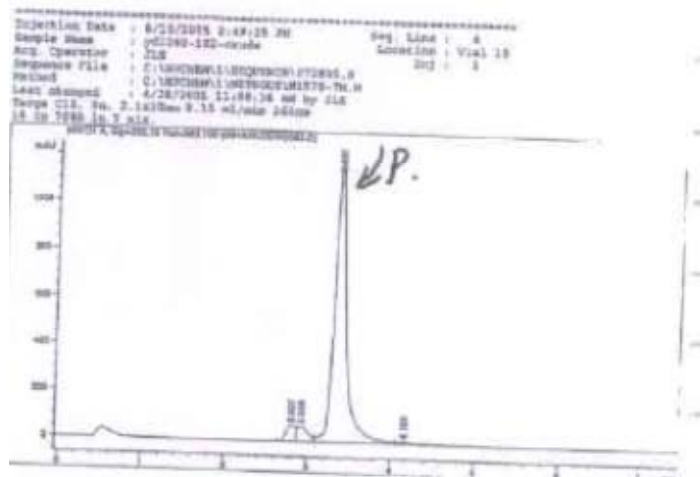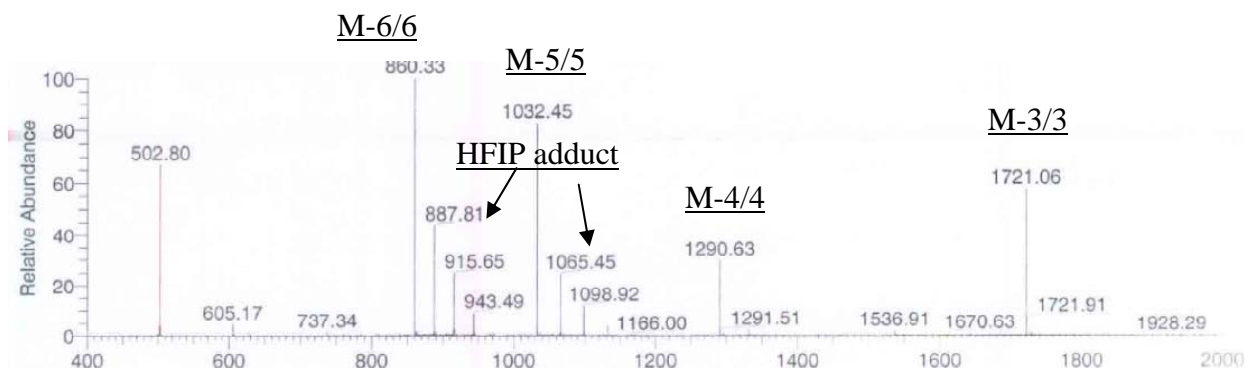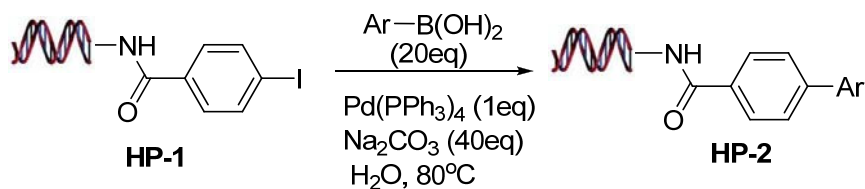

General procedure for the coupling of **HP-1** with boronic acids in Table 1.

A 1 mM solution of **HP-1** in water (20 nmol, 20 µL) was added 20 equivalents of boronate (1 µL, 400 mM in CH<sub>3</sub>CN/H<sub>2</sub>O 1/1) and 40 equivalents of Na<sub>2</sub>CO<sub>3</sub> (0.5 µL, 1.6 M in water), followed by 1 equivalent of degassed Pd(PPh<sub>3</sub>)<sub>4</sub> (1 µL, 20 mM in CH<sub>2</sub>Cl<sub>2</sub>/Toluene/CH<sub>3</sub>CN 1/2/2). The reaction was allowed to proceed at 80 °C.

Table 1: Suzuki coupling of **HP-1** with boronic acids

| Entry | Boronic acid | Expected | M-3/3 | M-4/4 | M-5/5 | M-6/6 |
|-------|--------------|----------|-------|-------|-------|-------|
|-------|--------------|----------|-------|-------|-------|-------|

|   |                                                                                   | mass    |         |         |         |        |
|---|-----------------------------------------------------------------------------------|---------|---------|---------|---------|--------|
| 1 | 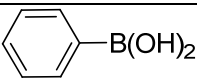 | 5117.4  | 1704.8  | 1278.35 | 1022.48 | 851.9  |
| 2 |  | 5185.4  | 1727.47 | 1295.35 | 1036.08 | 863.23 |
| 3 |  | 5161.41 | 1719.47 | 1289.35 | 1031.28 | 859.24 |
| 4 |  | 5135.39 | 1710.80 | 1282.85 | 1026.08 | 854.90 |
| 5 |  | 5159.44 | 1718.81 | 1288.86 | 1030.89 | 858.91 |
| 6 |  | 5147.42 | 1714.81 | 1285.86 | 1028.48 | 856.90 |
| 7 |  | 5142.41 | 1713.14 | 1284.60 | 1027.48 | 856.07 |

Table 1, entry 1A: LCMS @ 90 min

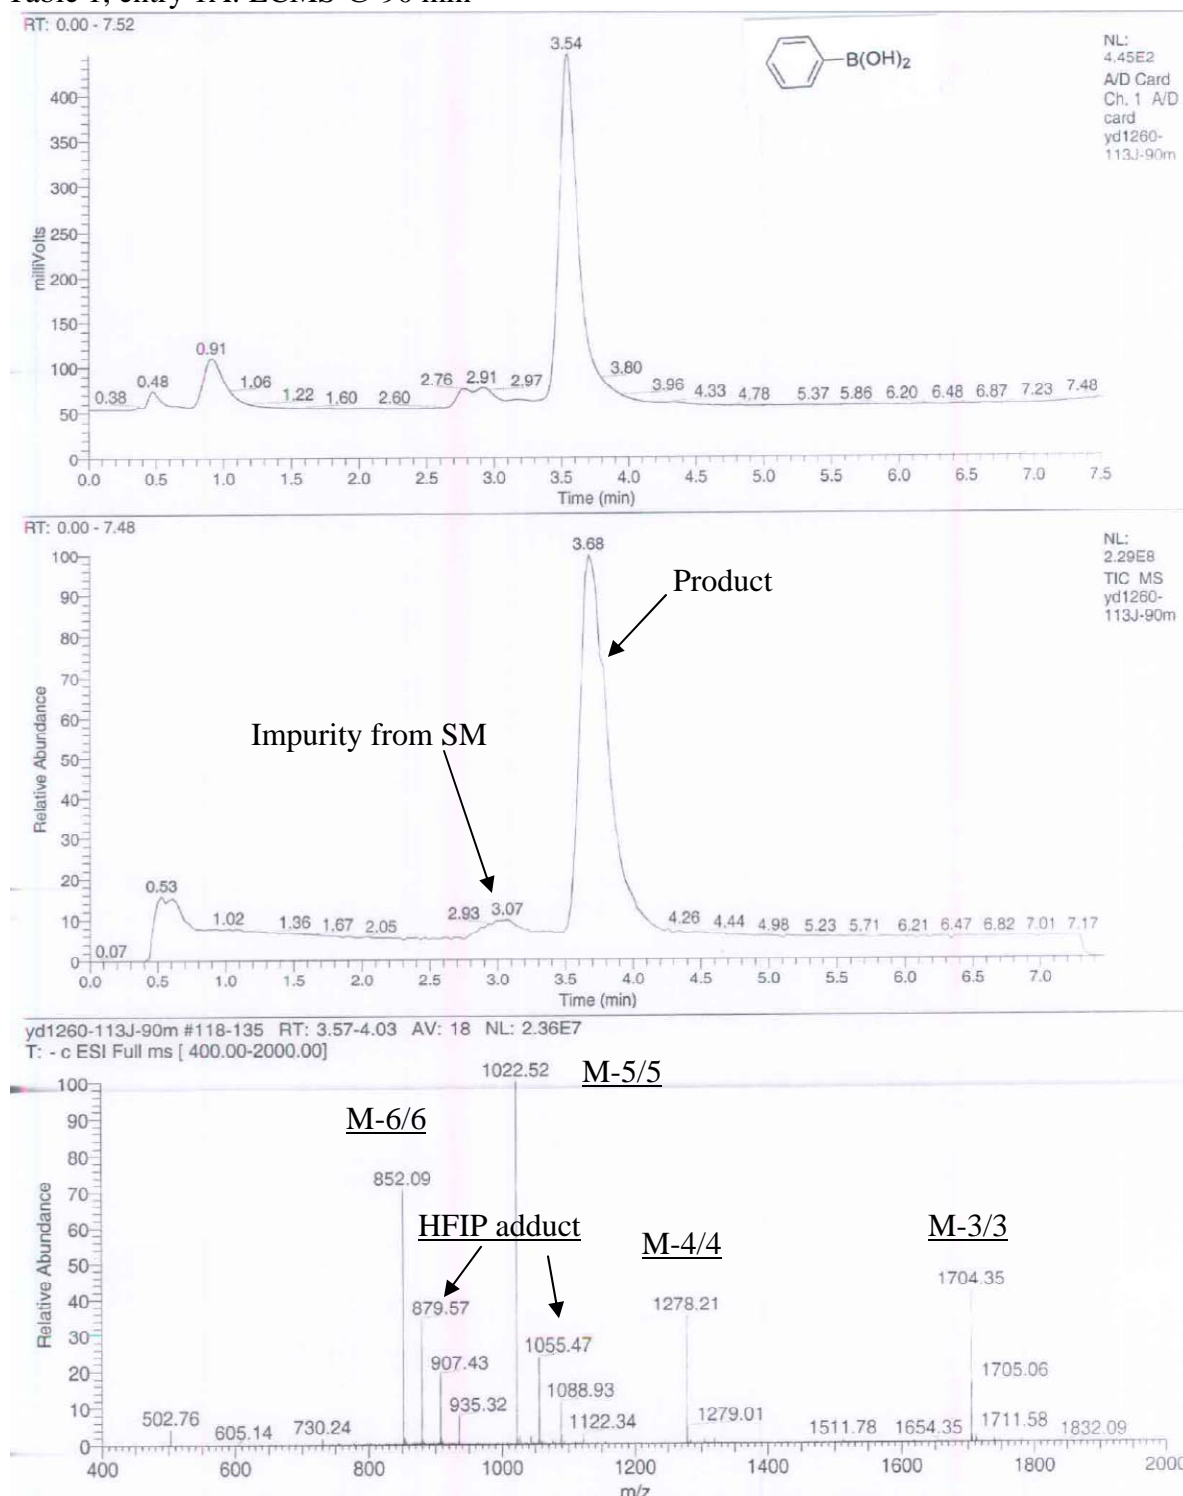

Table 1, entry 1A: LCMS @ 17 h

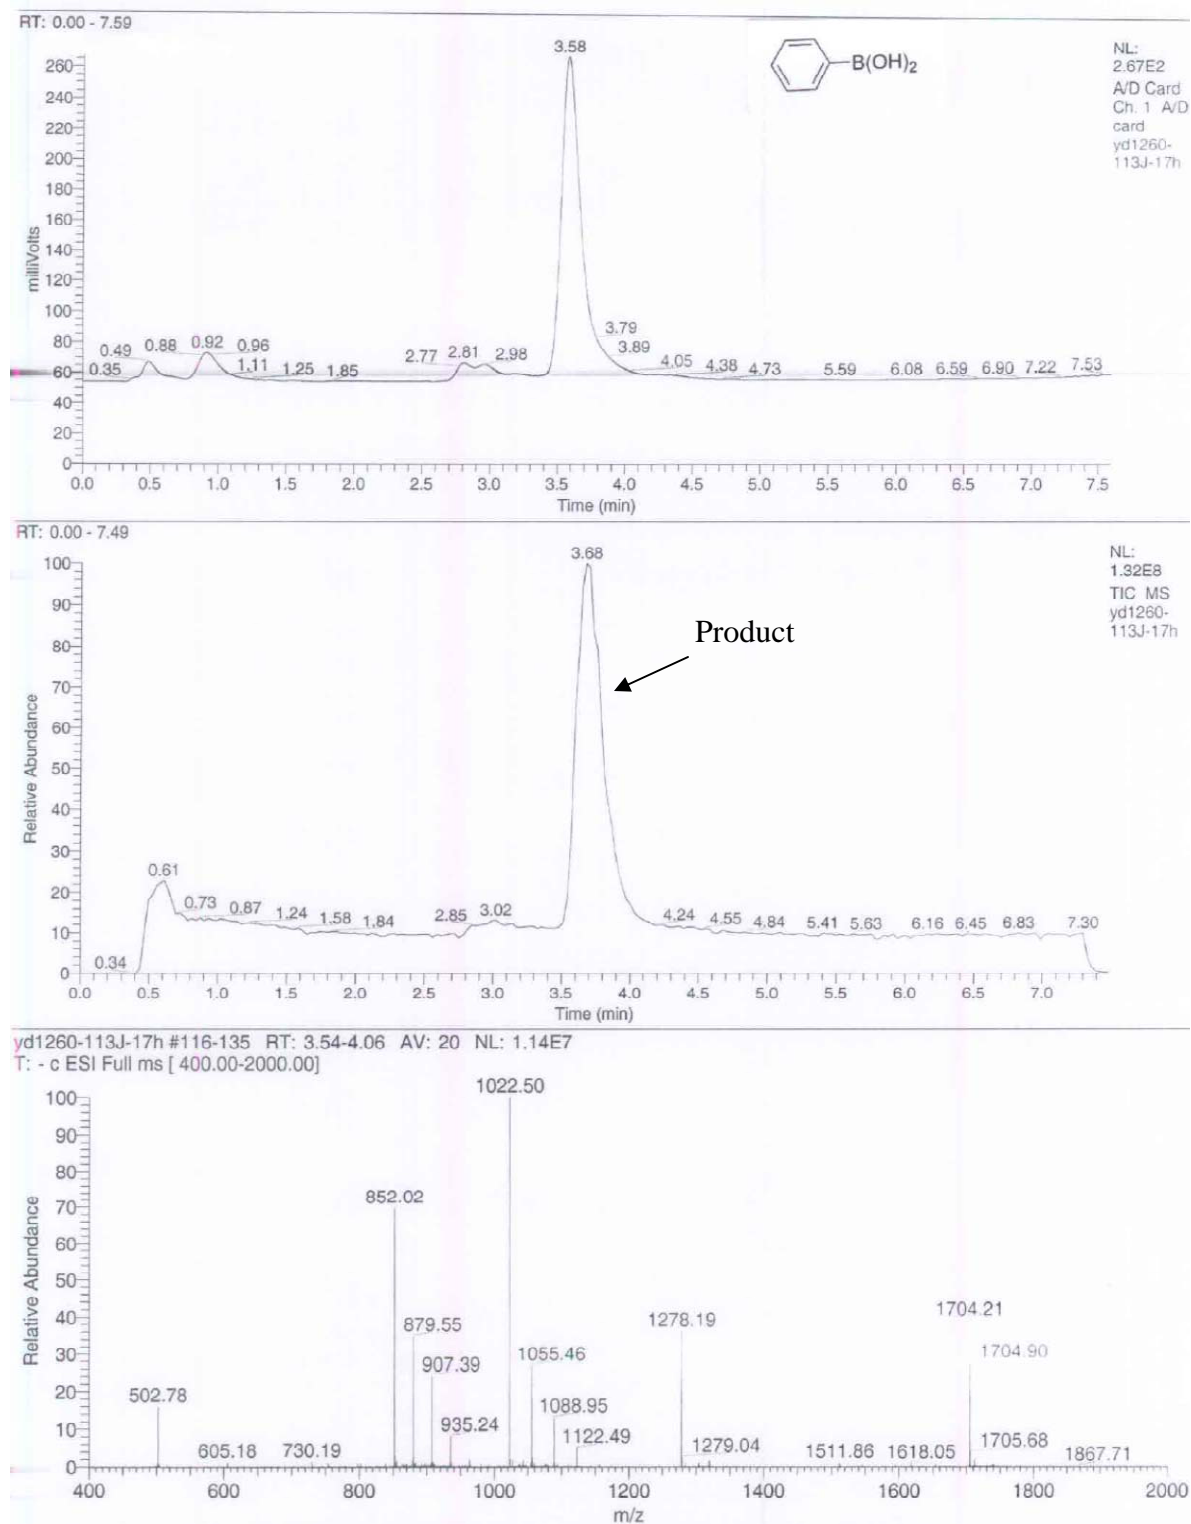

Table 1, entry 2A: LCMS @ 90 min

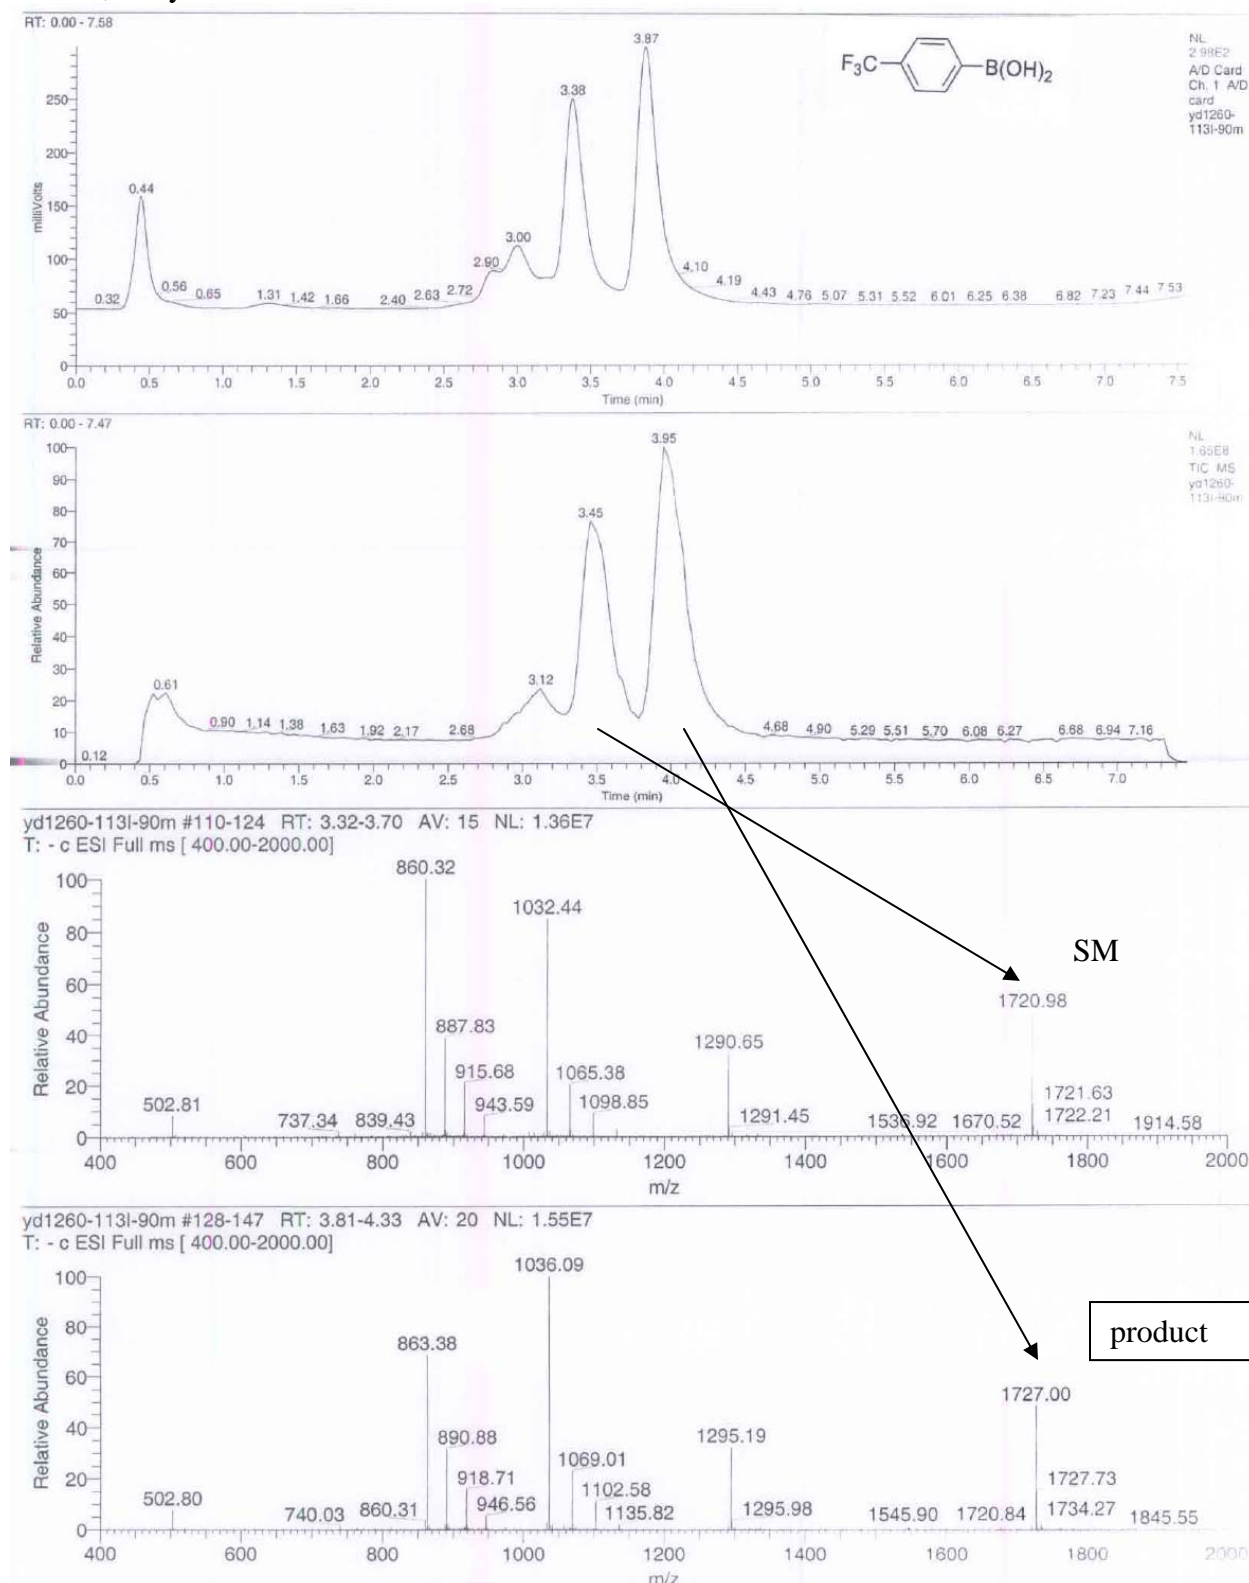

Table 1, entry 2A: LCMS @ 17 h

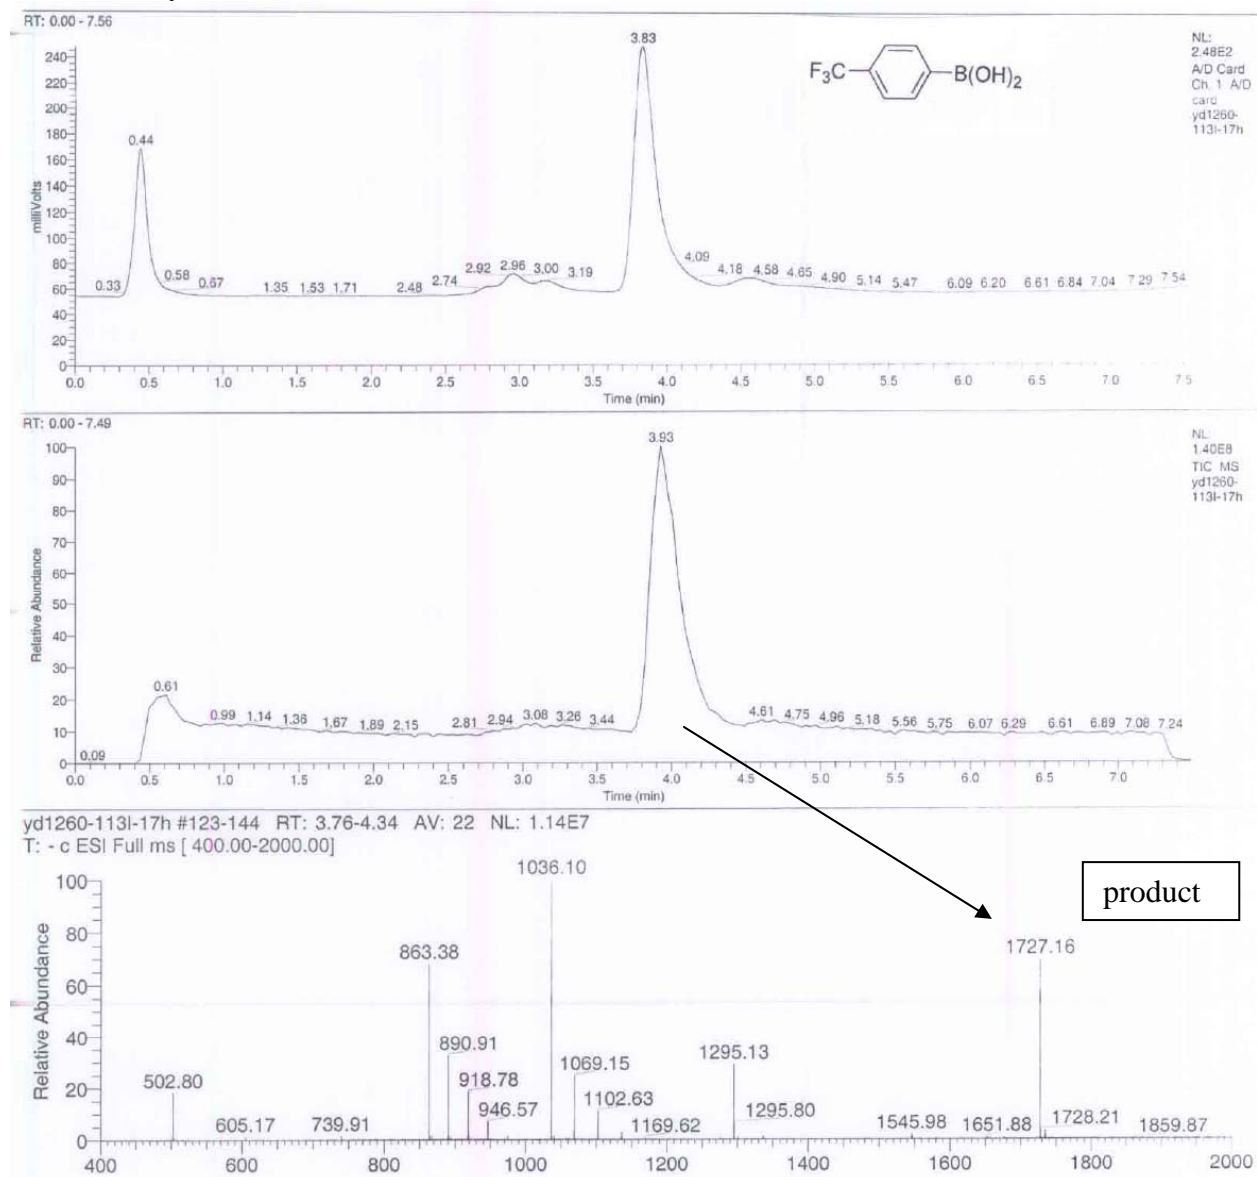



Table 1, entry 3A: LCMS @ 90 min

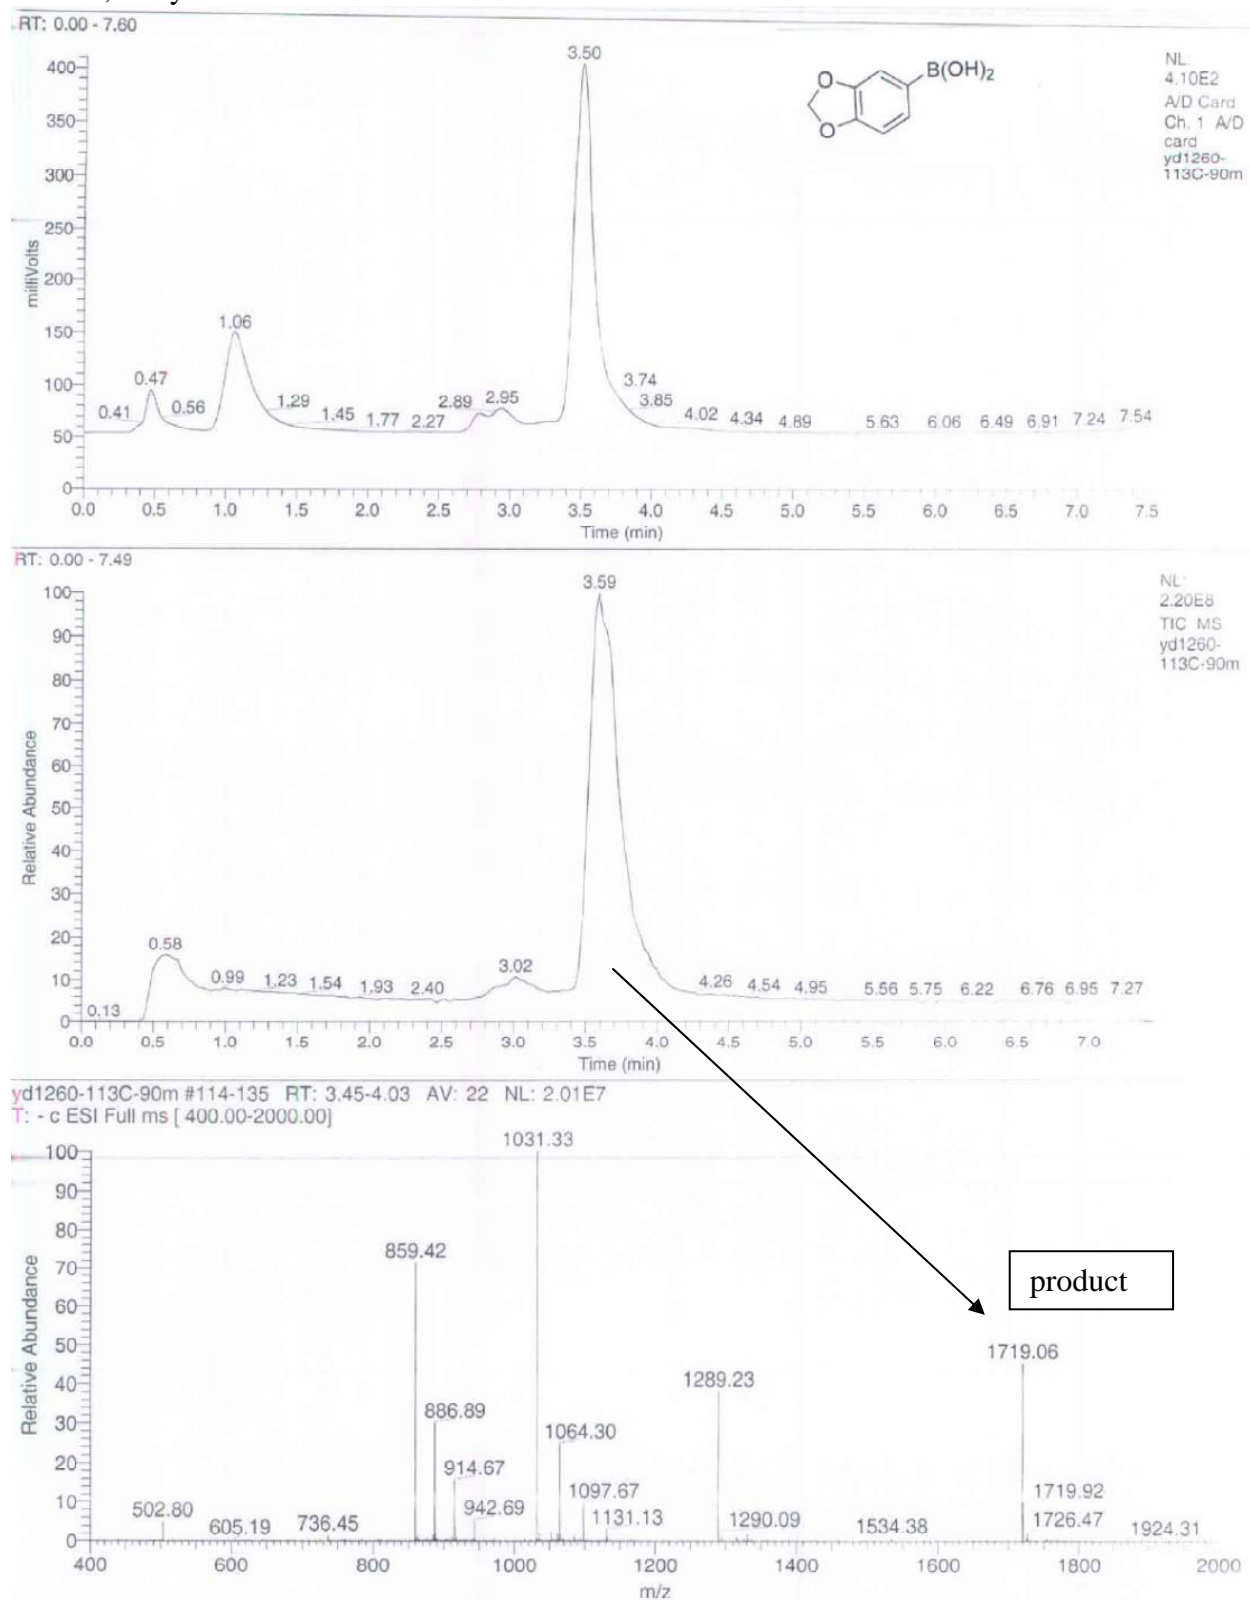

Table 1, entry 3A: LCMS @ 17 h

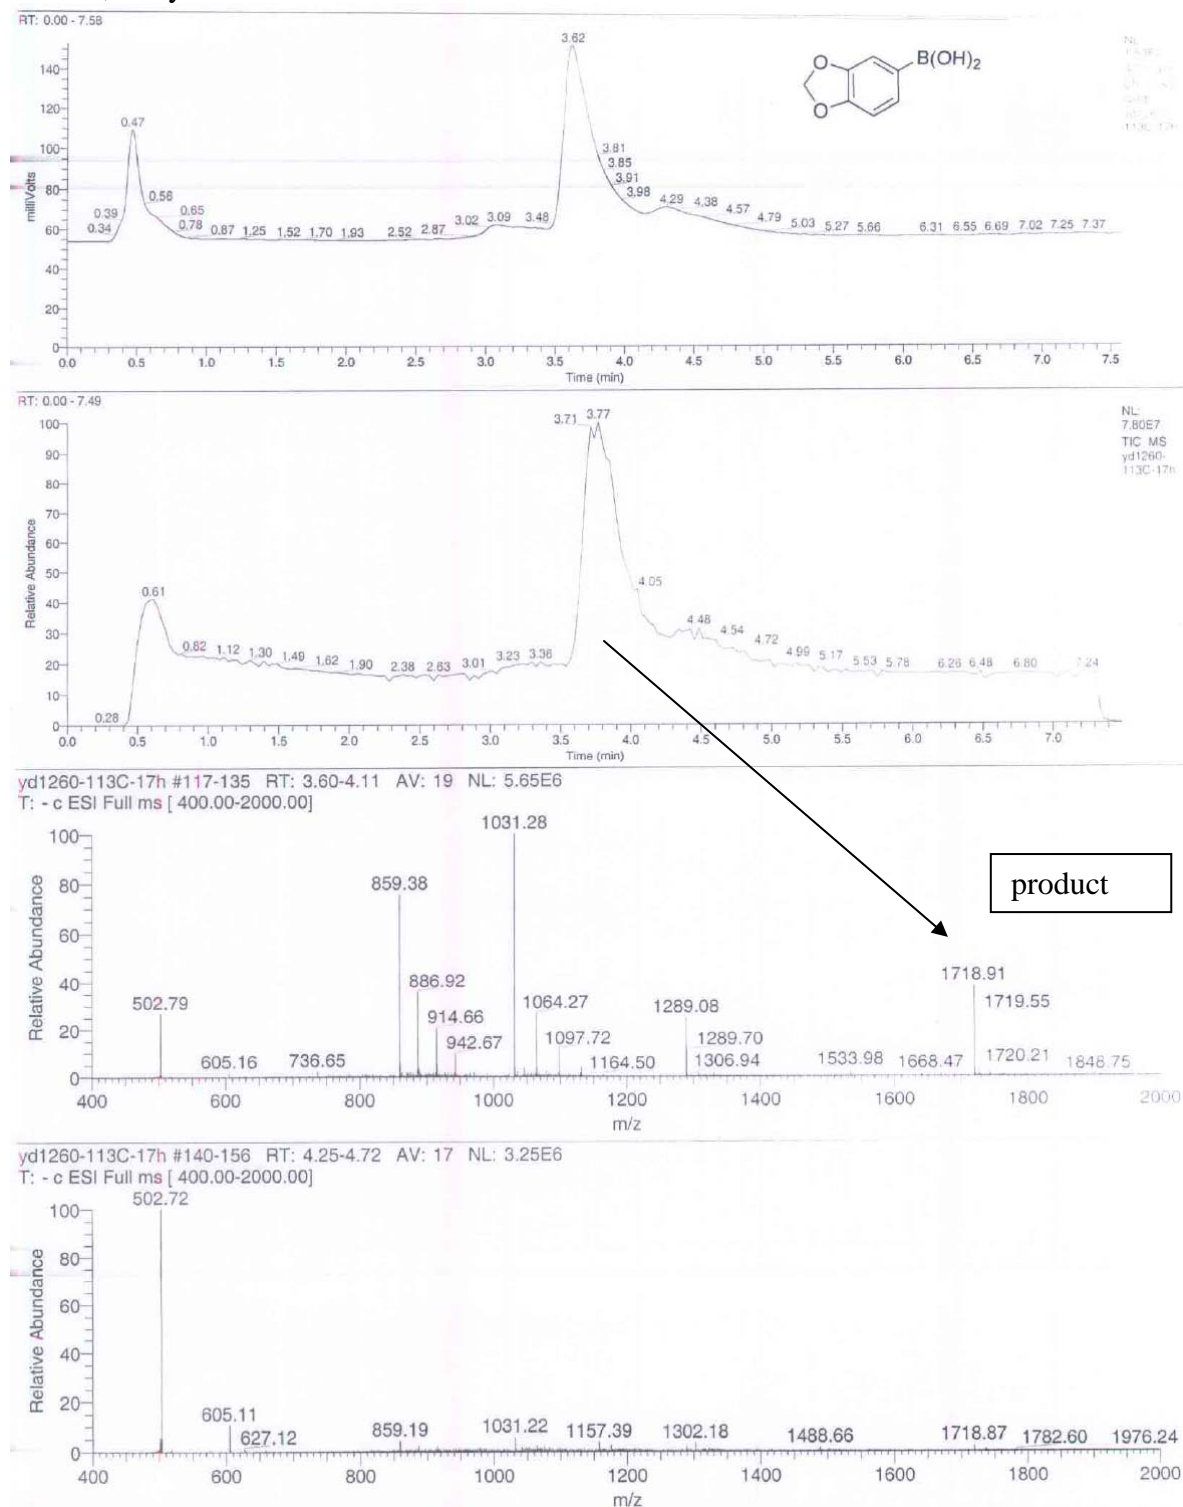

Table 1, entry 4A: LCMS @ 90 min

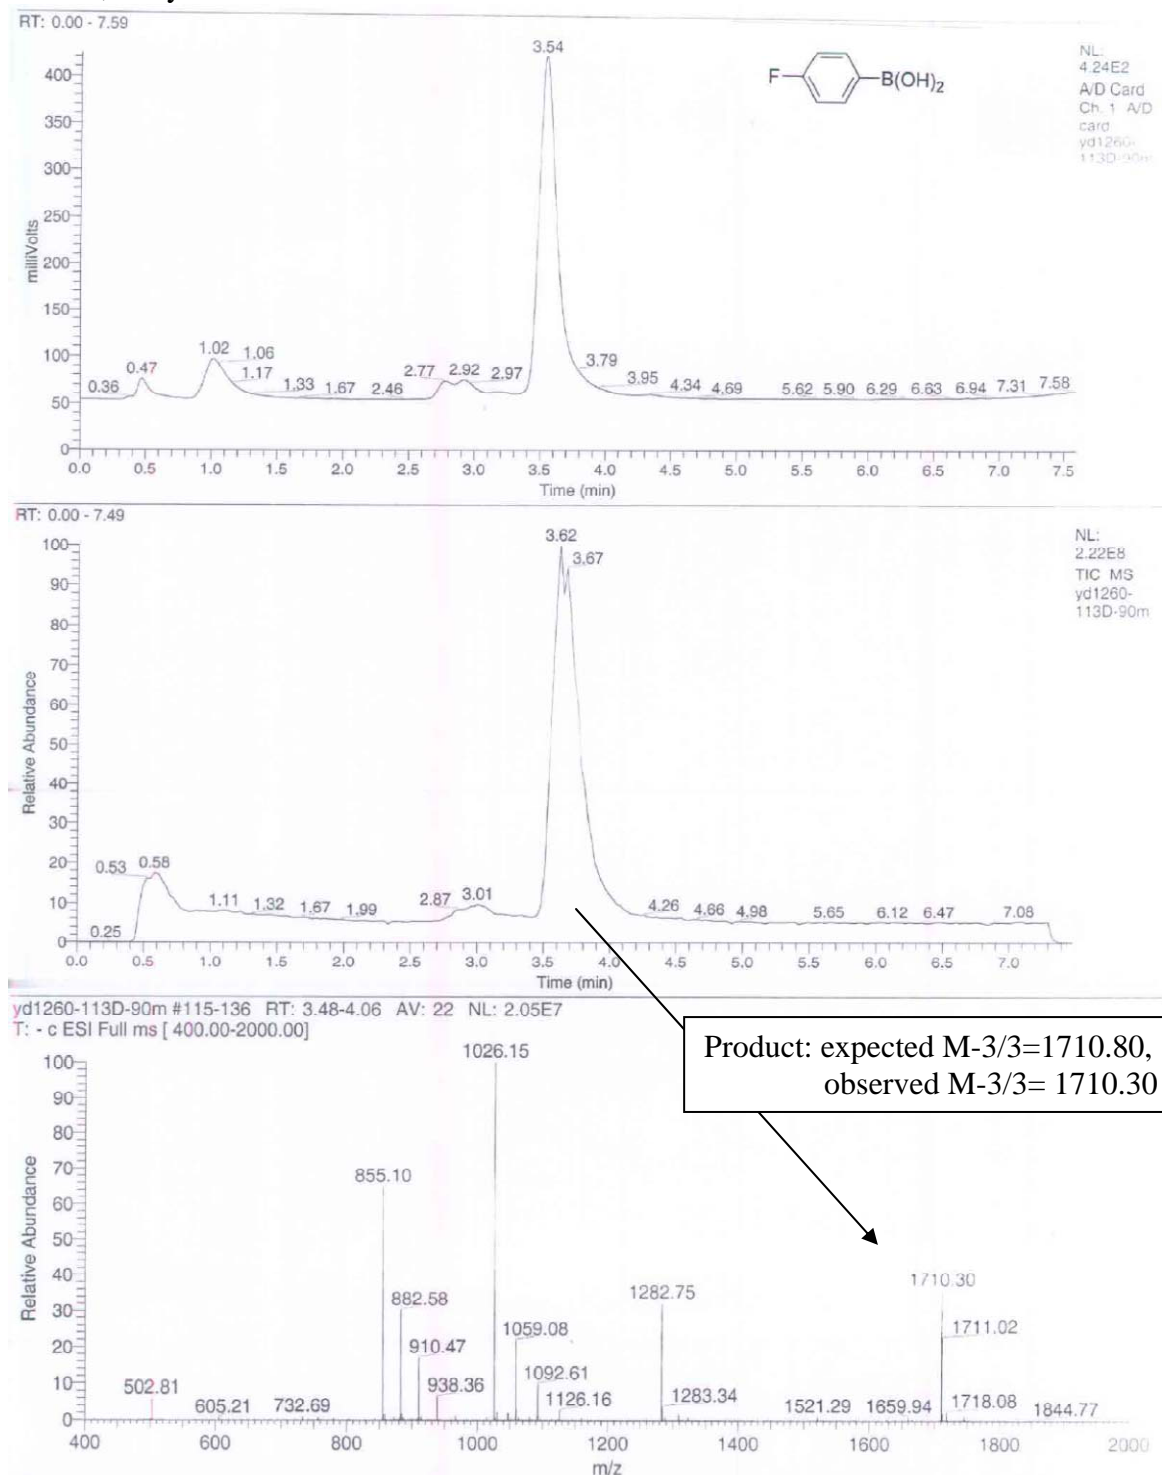

Table 1, entry 4A: LCMS @ 17 h

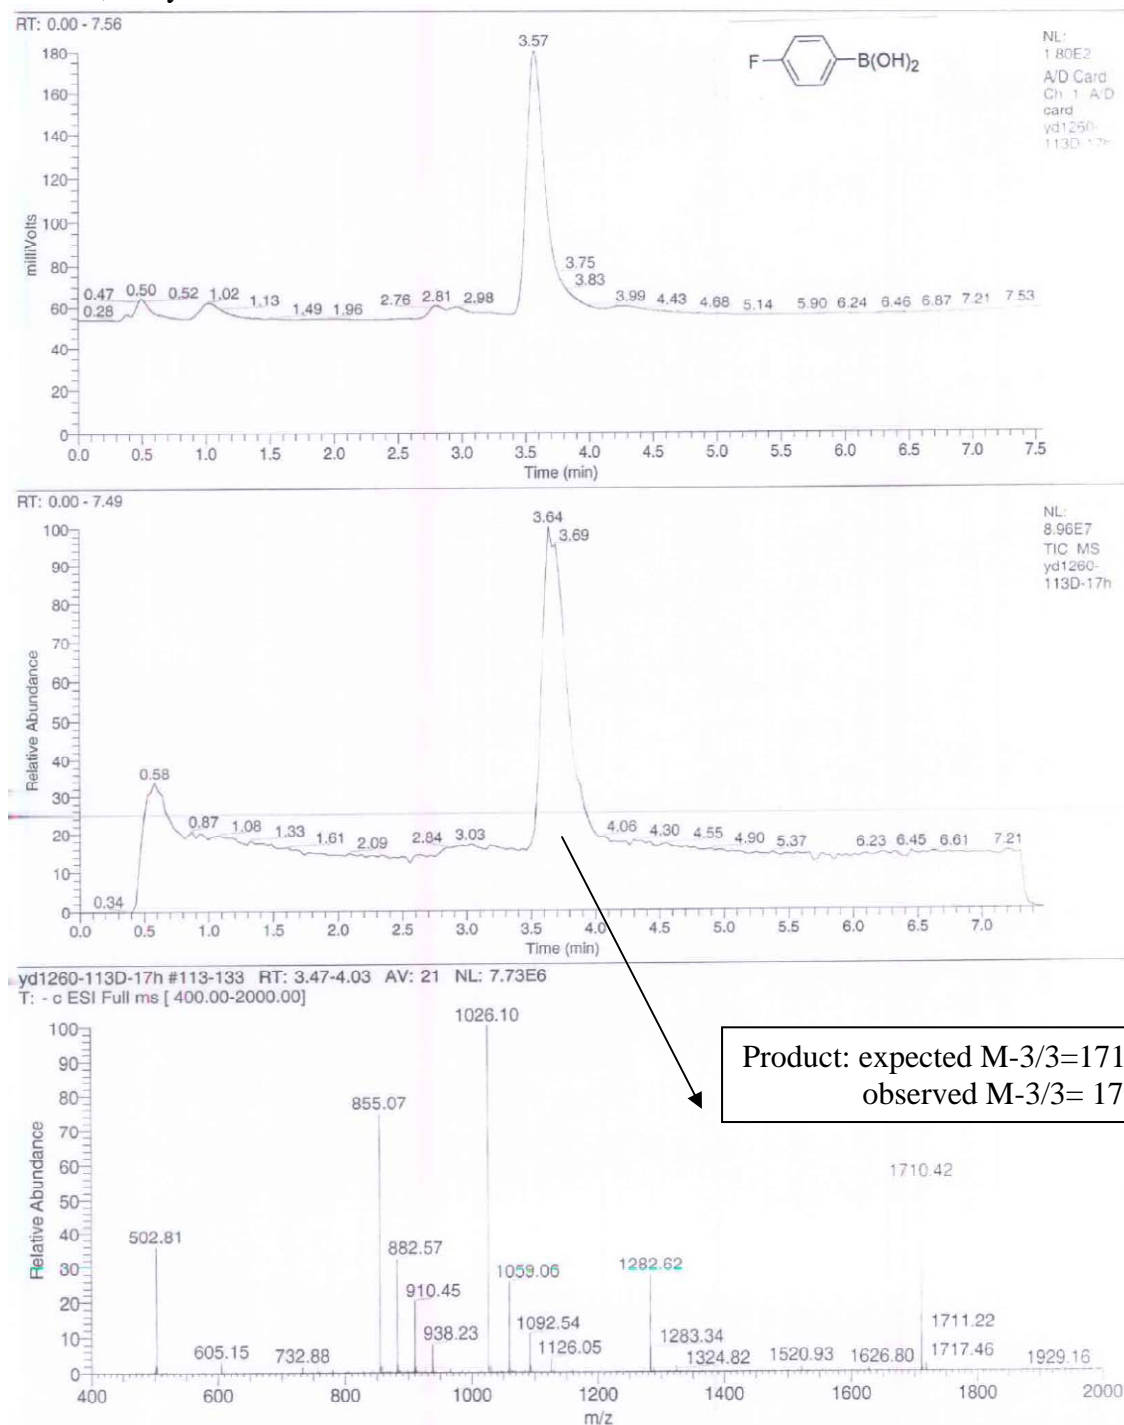

Table 1, entry 5A: LCMS @ 90 min

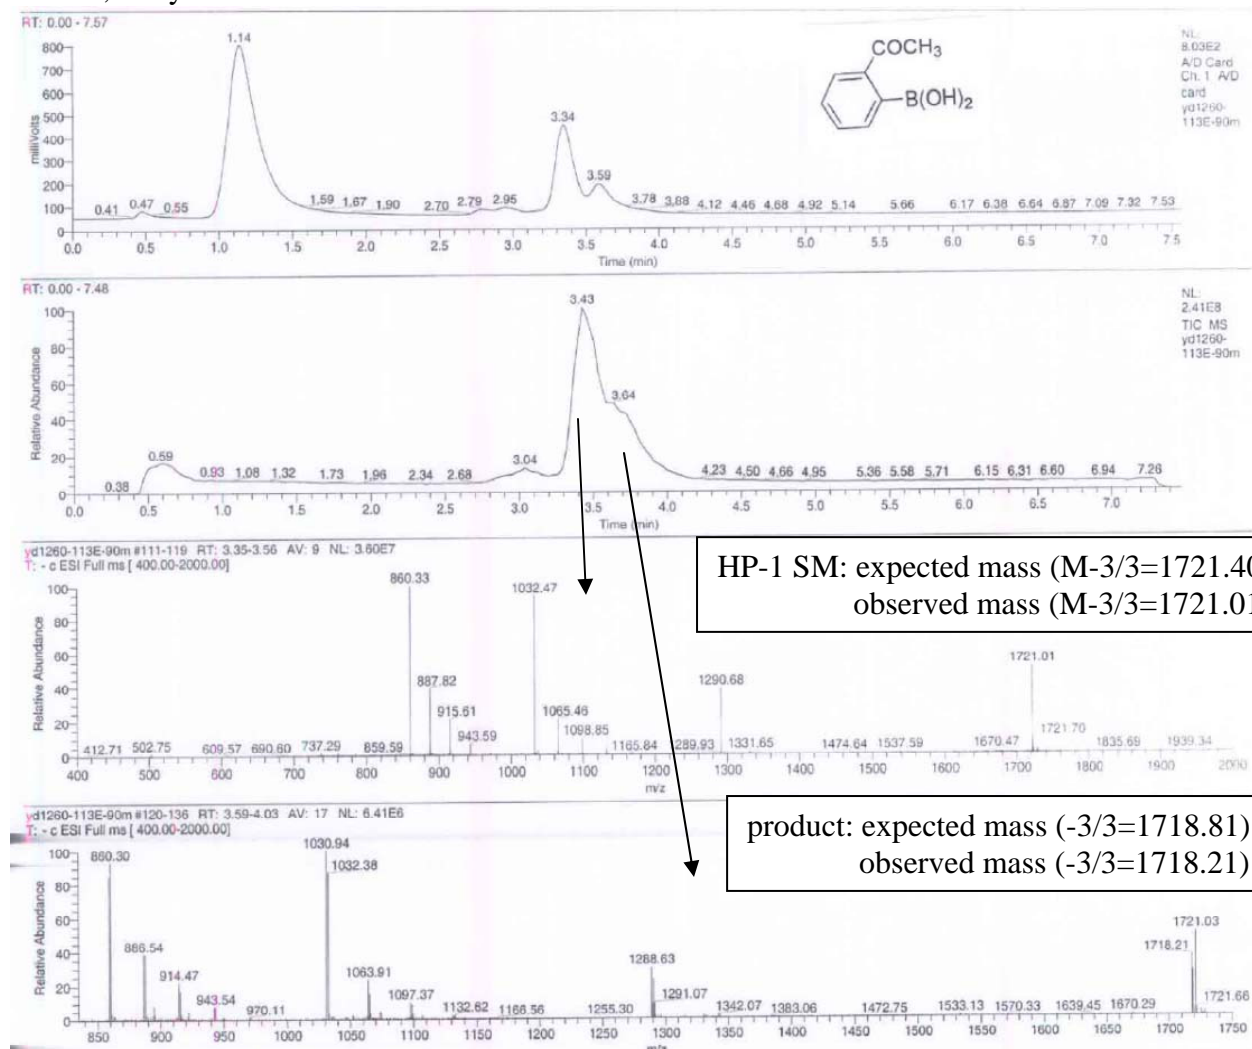

Table 1, entry 5A: LCMS @ 17 h

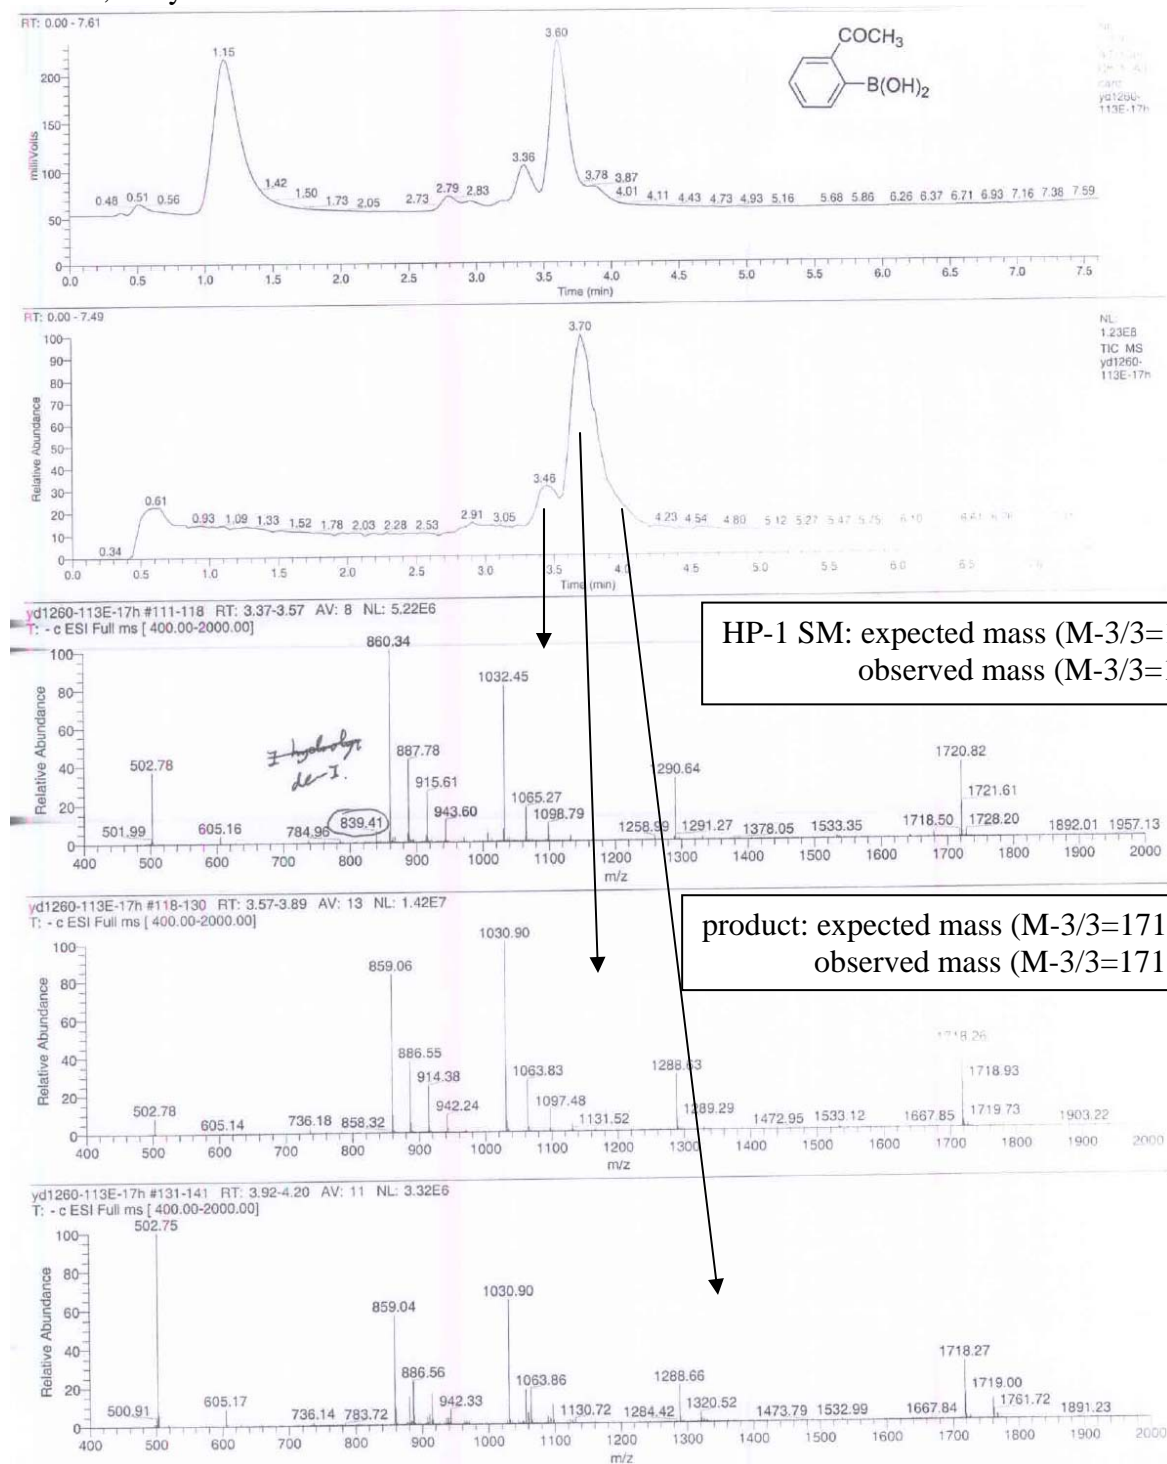



Table 1, entry 6A: LCMS @ 90 min

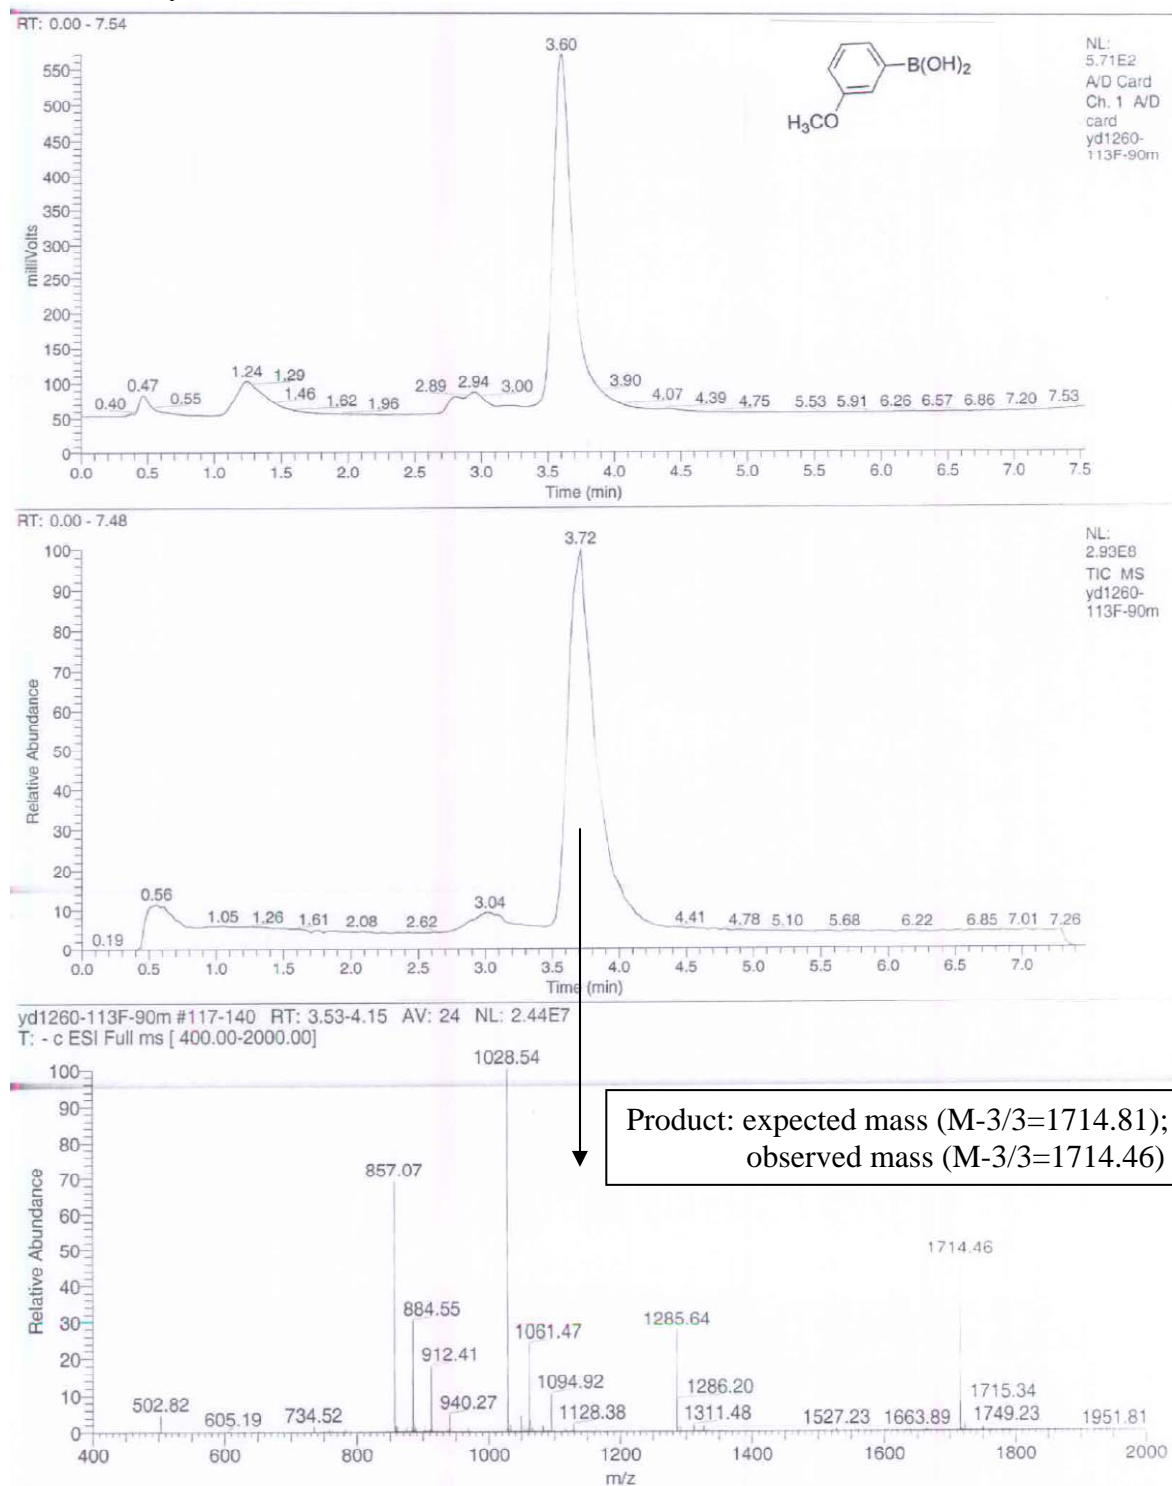

Table 1, entry 6A: LCMS @ 17 h

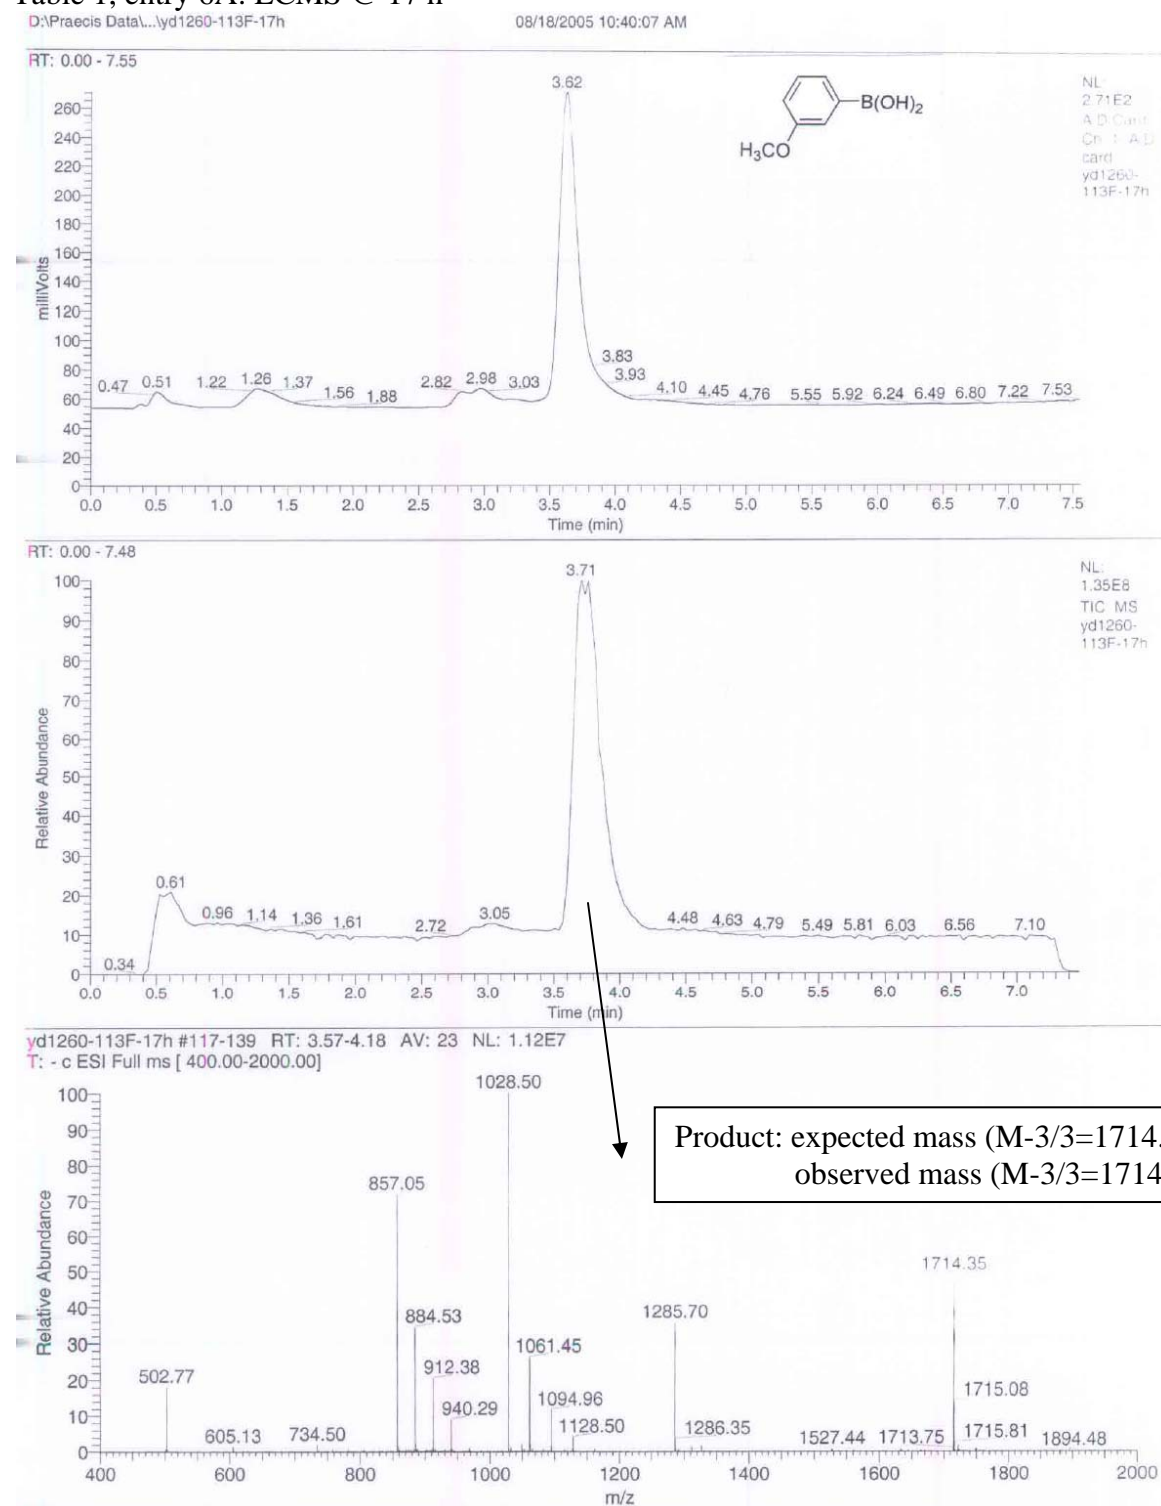



Table 1, entry 7A: LCMS @ 90 min

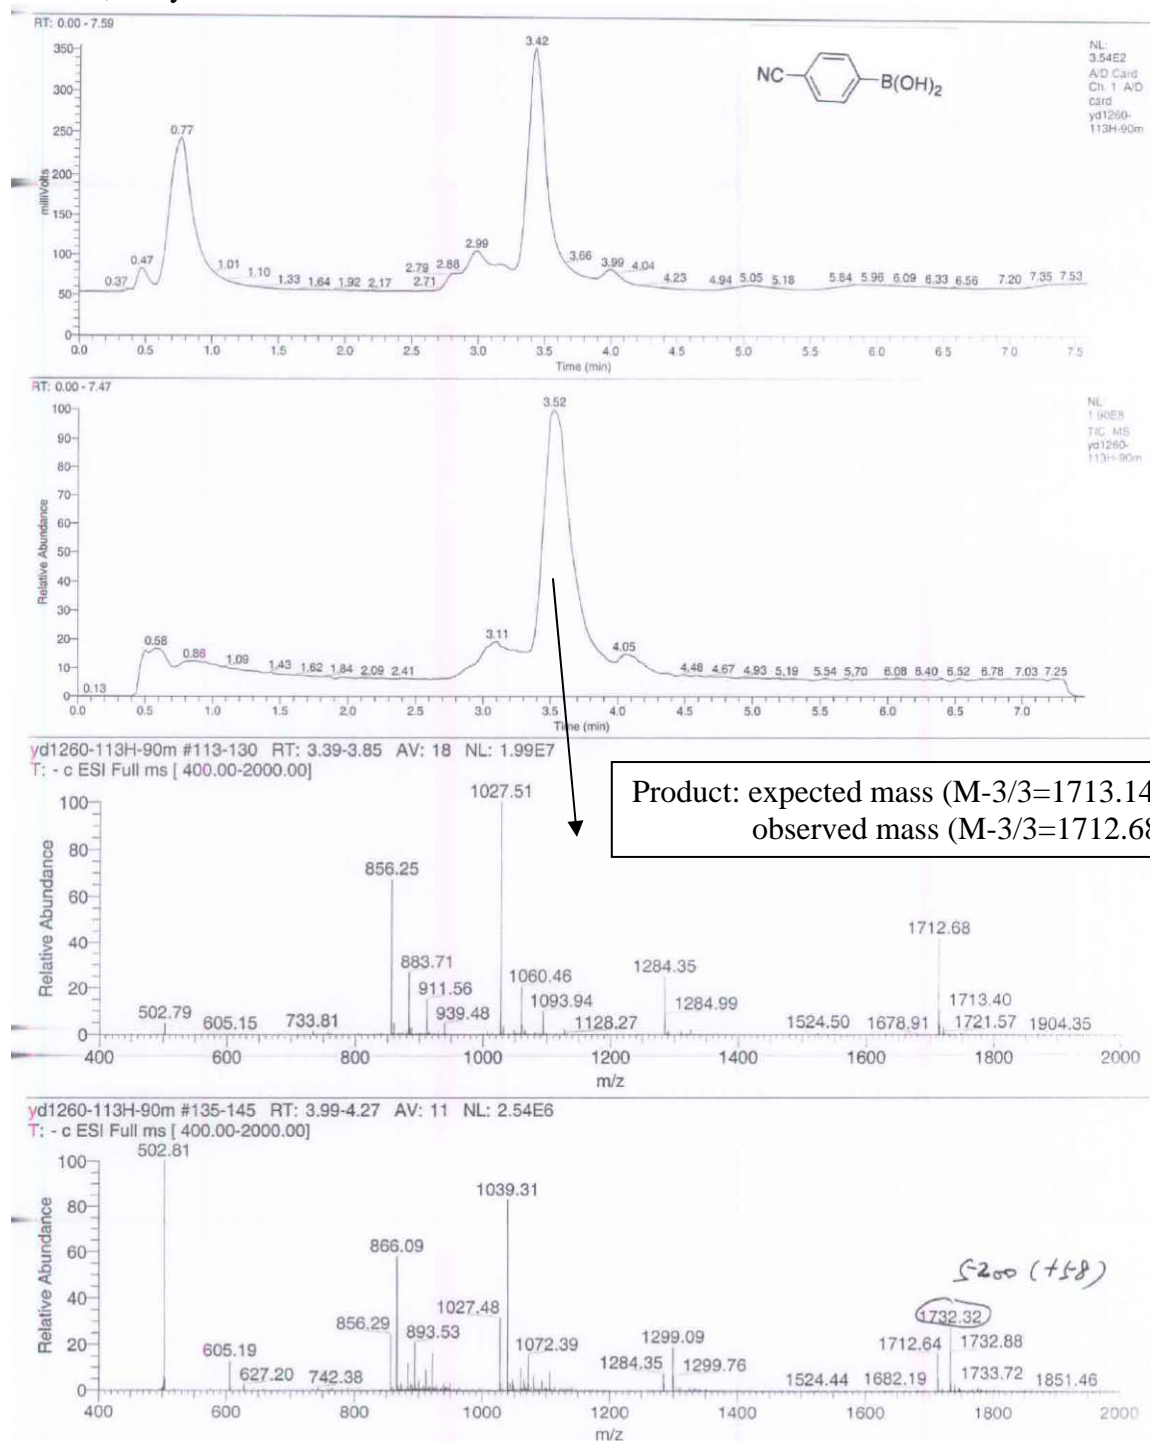

Table 1, entry 7A: LCMS @ 17 h

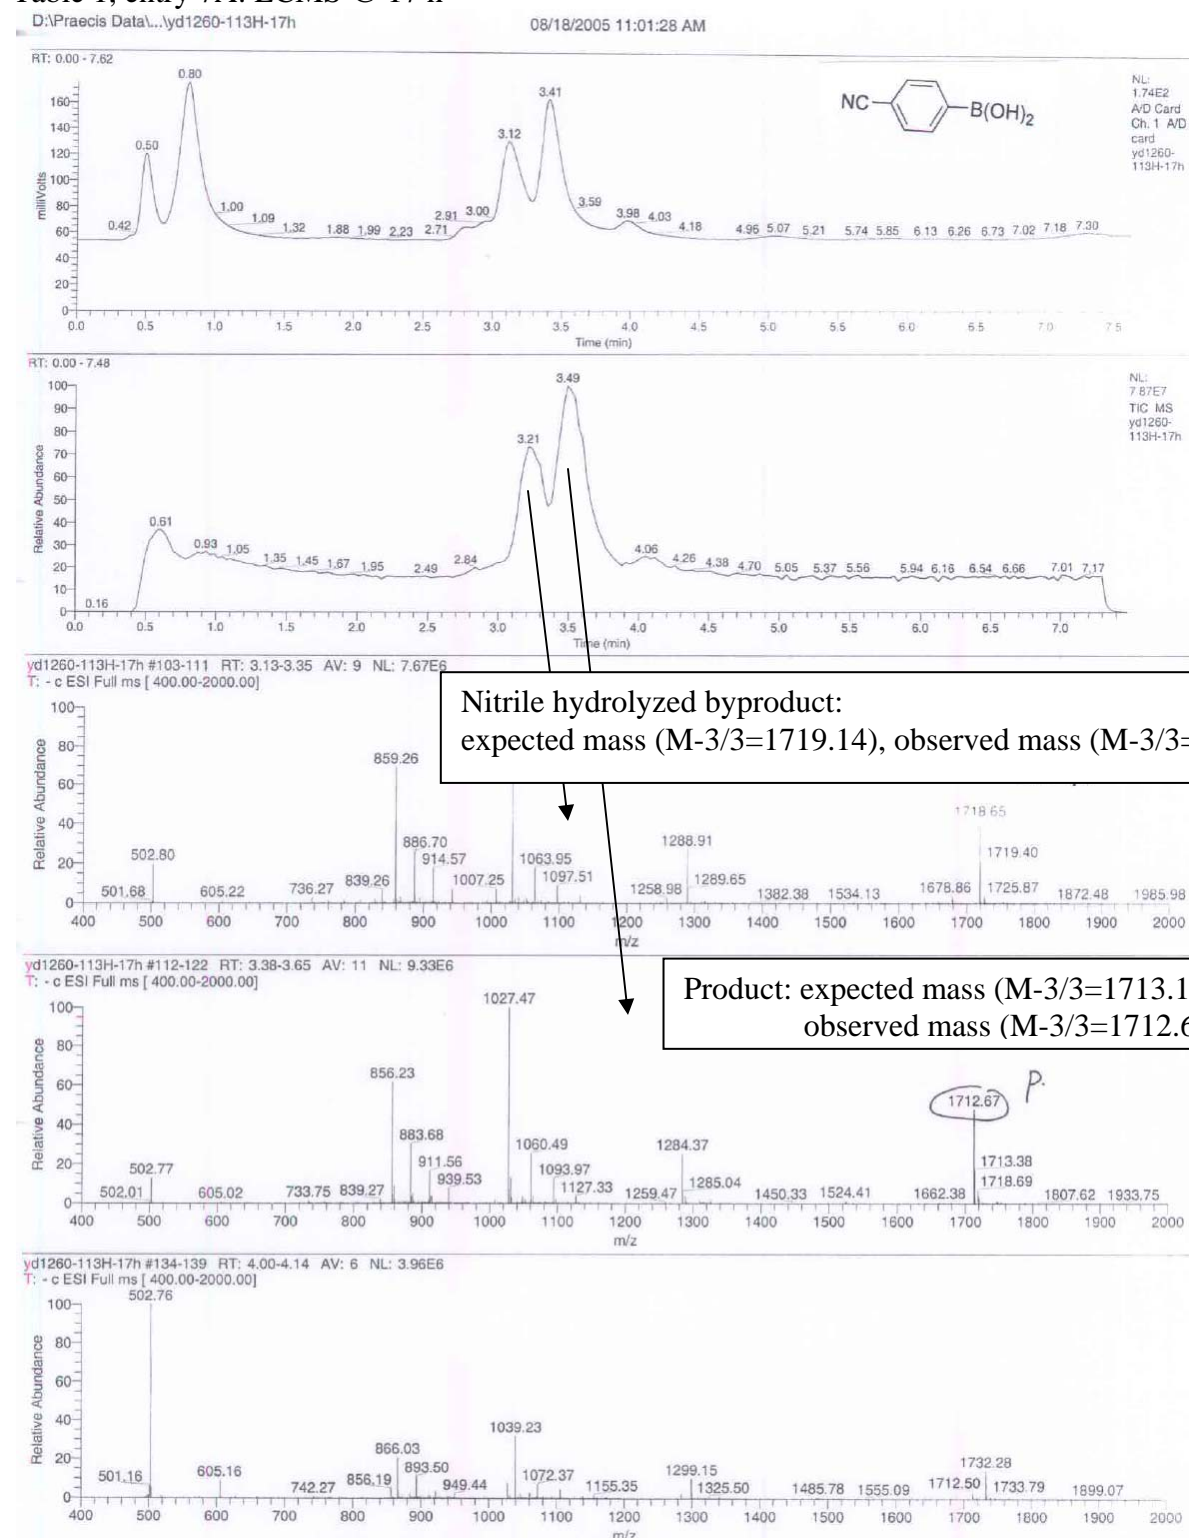

### Preparation of **HP-3**

A solution of HP in pH9.4 borate buffer (250 mM) (1  $\mu$ mol, 300  $\mu$ L) was added at cold 40 equivalents of 4-iodophenylacetic acid (10.5 mg in 70  $\mu$ L of DMF), followed by 40 equivalents of DMT-MM (10.9 mg in 70  $\mu$ L of water). After being kept at cold for 30 minutes, the reaction was allowed to proceed at room temperature for 5 hours. The reaction was further treated with piperidine (44  $\mu$ L) for 5 minutes, followed with precipitation by 10% 5N NaCl water solution and 2.5 times volume of absolute EtOH. The pellet was redissolved in water and would be used directly for the next step without further purification. It contained about 40% of HP and 60% of **HP-3**.

**HP-3**: expected mass 5181.23 (M-3/3=1726.08), observed 5180 (M-3/3=1725.66)



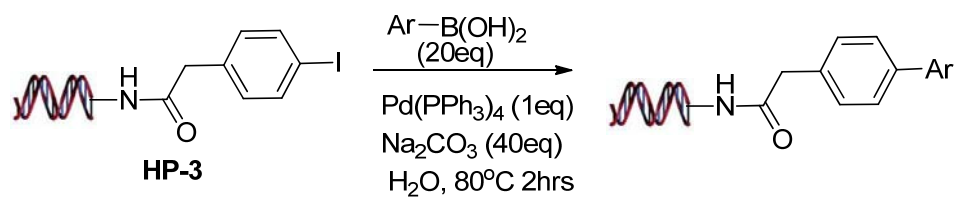

General procedure for the coupling of **HP-3** with boronic acids in Table 1.

A solution of **HP-3** in water (20 nmol in 14  $\mu\text{L}$ ) was added 20 equivalents of boronate (1  $\mu\text{L}$ , 400 mM in  $\text{CH}_3\text{CN}/\text{H}_2\text{O}$  1/1) and 40 equivalents of  $\text{Na}_2\text{CO}_3$  (0.5  $\mu\text{L}$ , 1.6 M in water), followed by 1 equivalent of degassed  $\text{Pd(PPh}_3)_4$  (1  $\mu\text{L}$ , 20 mM in  $\text{CH}_2\text{Cl}_2/\text{Toluene}/\text{CH}_3\text{CN}$  1/2/2). The reaction was allowed to proceed at 80  $^\circ\text{C}$  for 2 h.

Table 1, entry 1B:

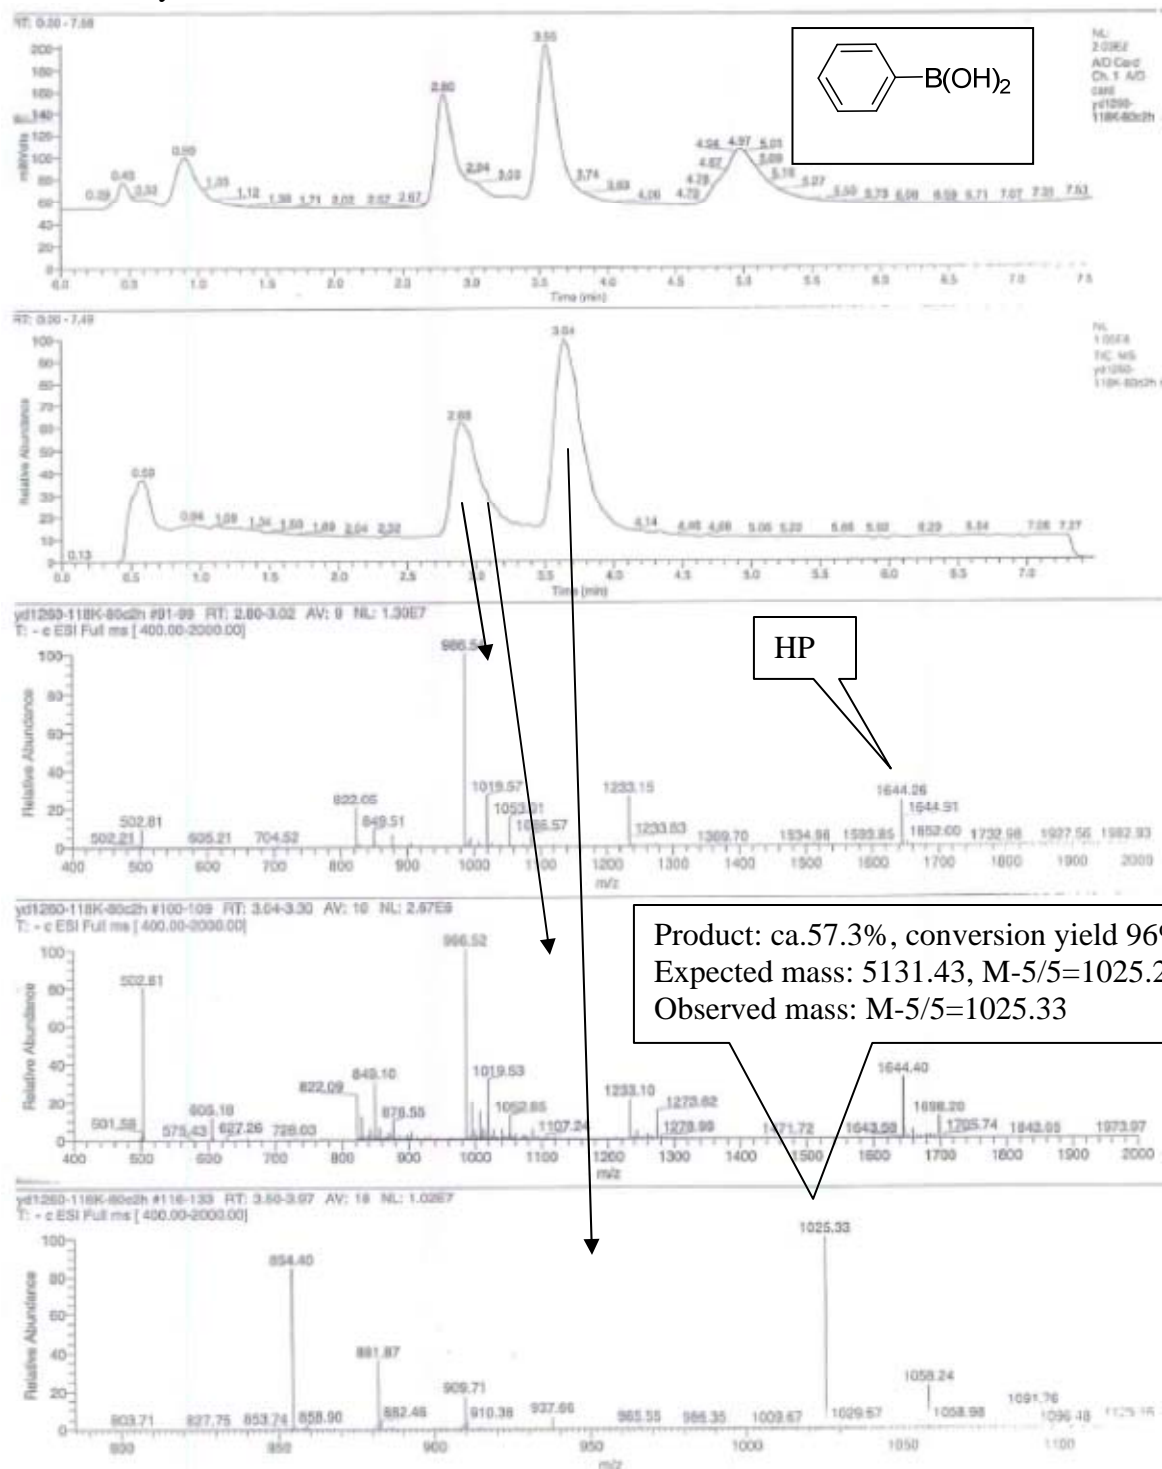

Q:\Pracis Data\...jyd1260-1181-80c2h

Fc1ccc(B(O)O)cc1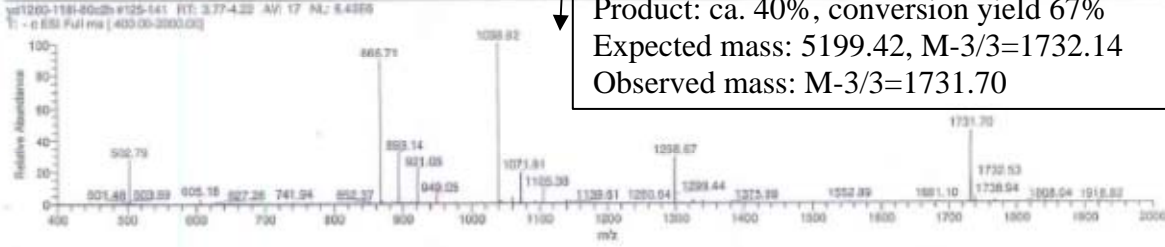

Product: ca. 40%, conversion yield 67%  
Expected mass: 5199.42, M-3/3=1732.14  
Observed mass: M-3/3=1731.70



Table 1, entry 3B:

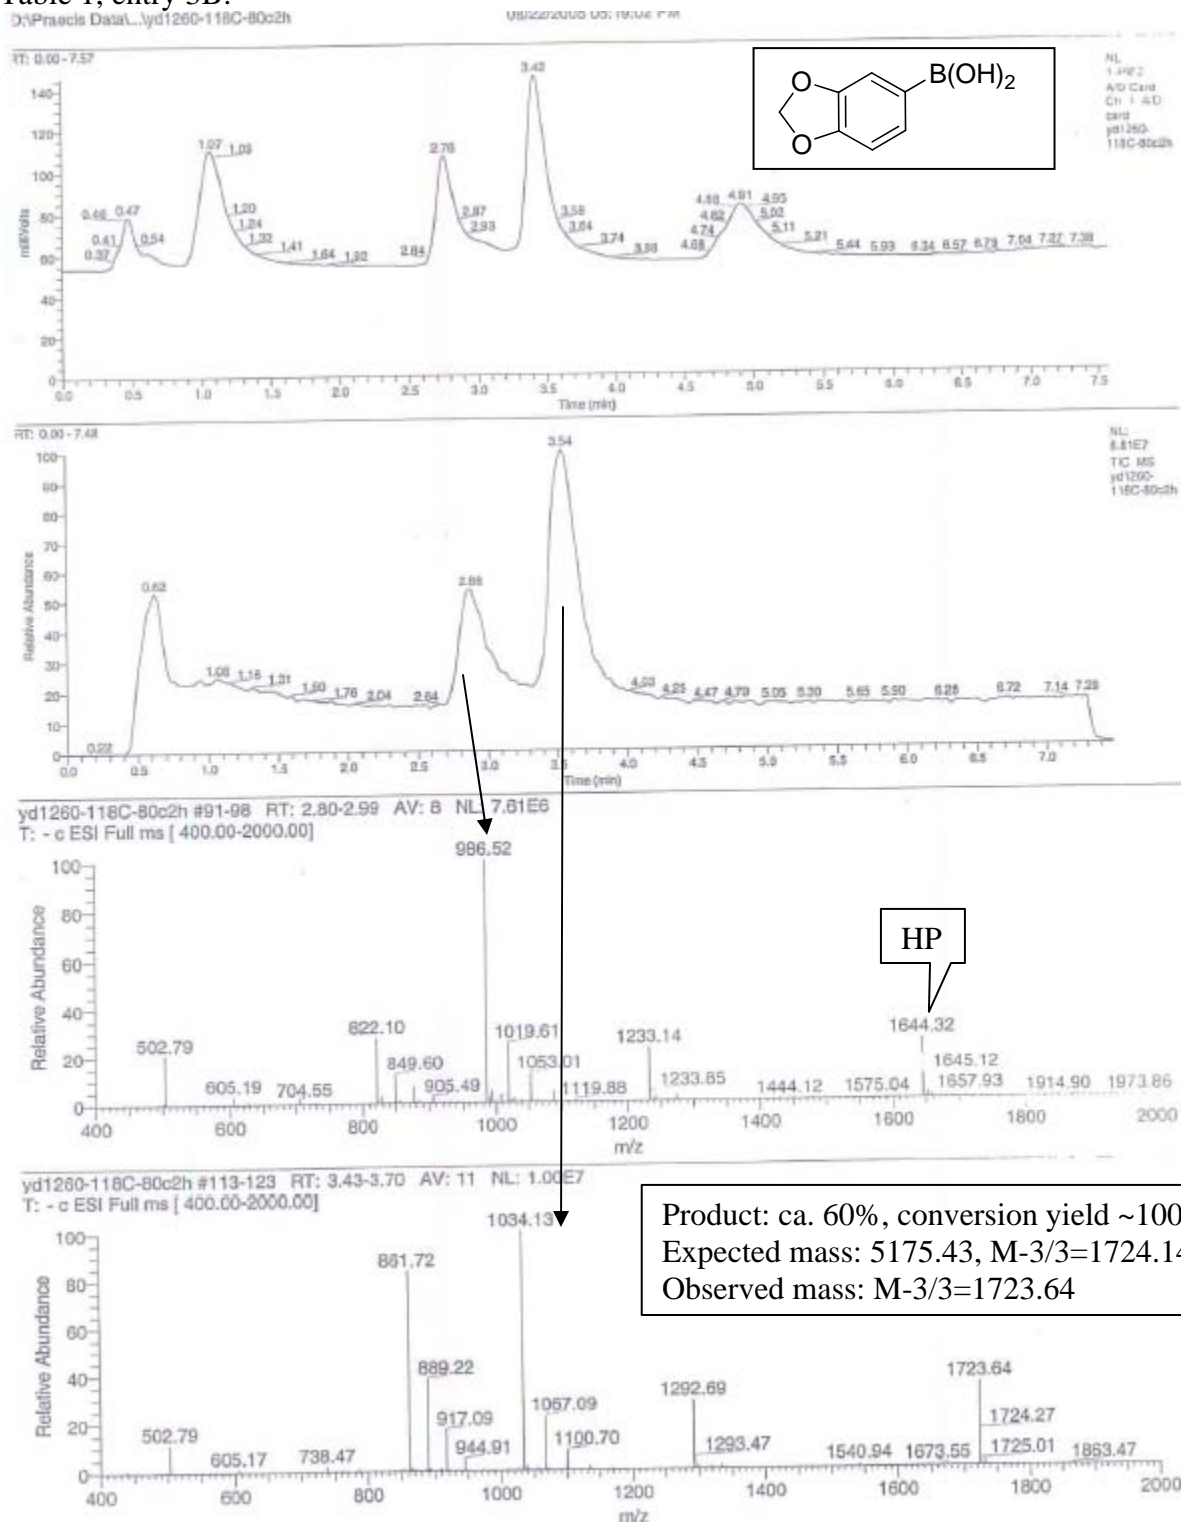



Table 1, entry 4B:

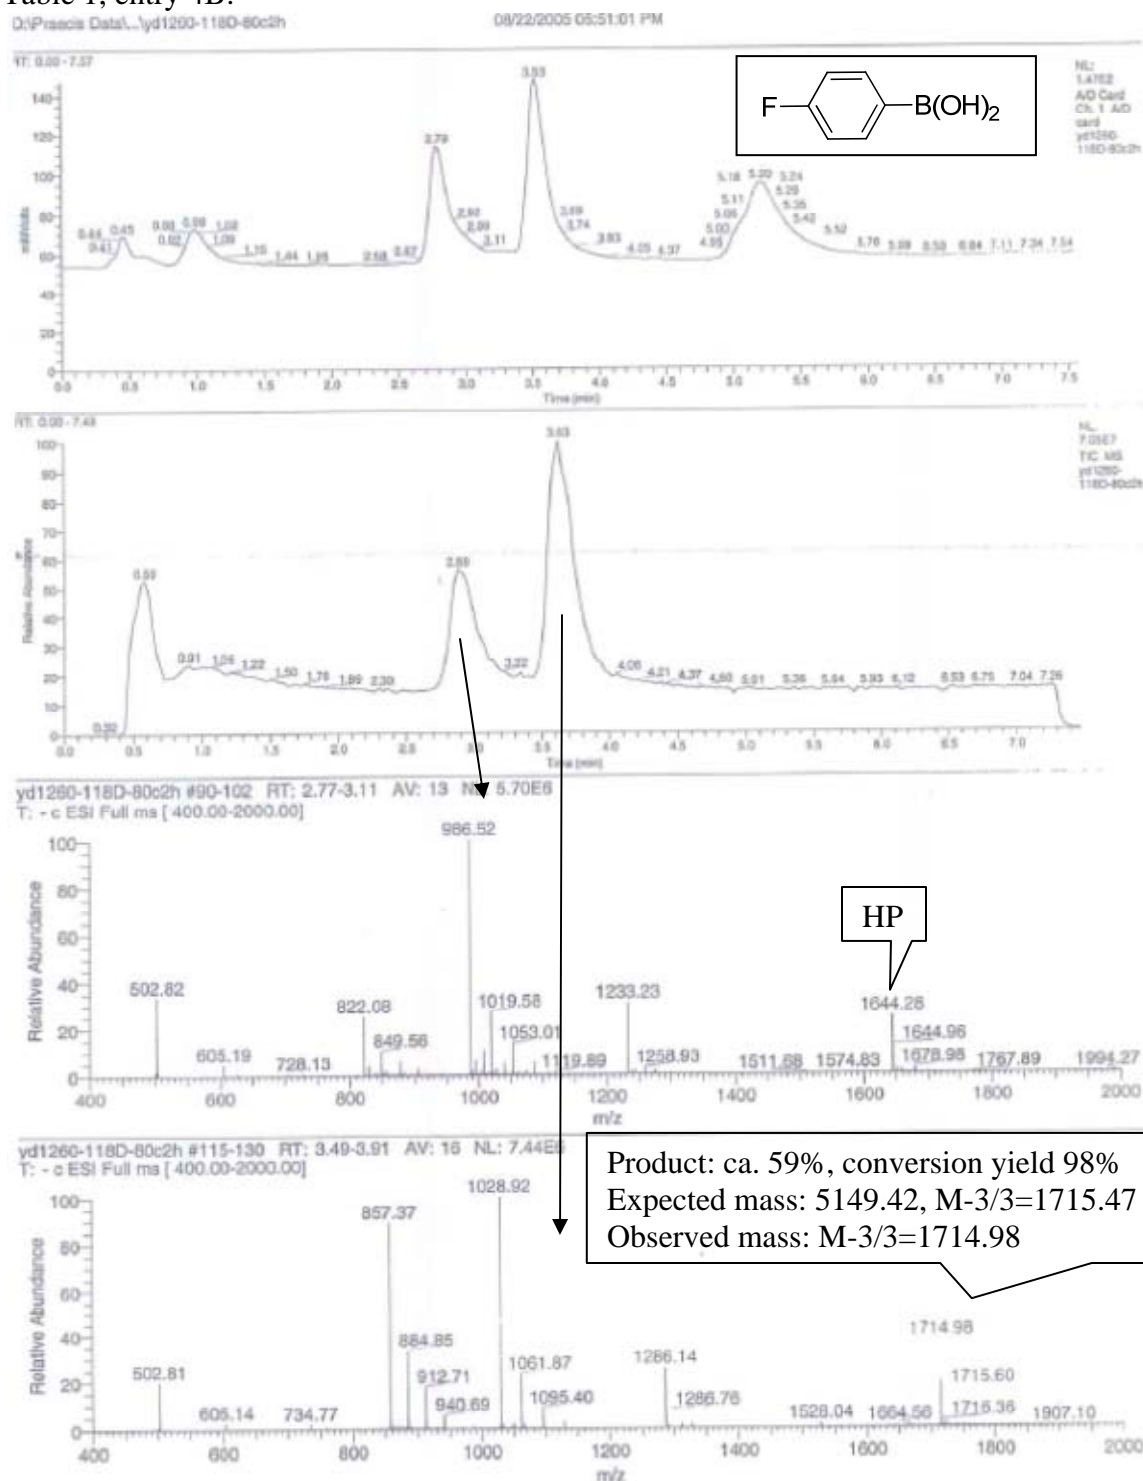

Table 1, entry 5B:

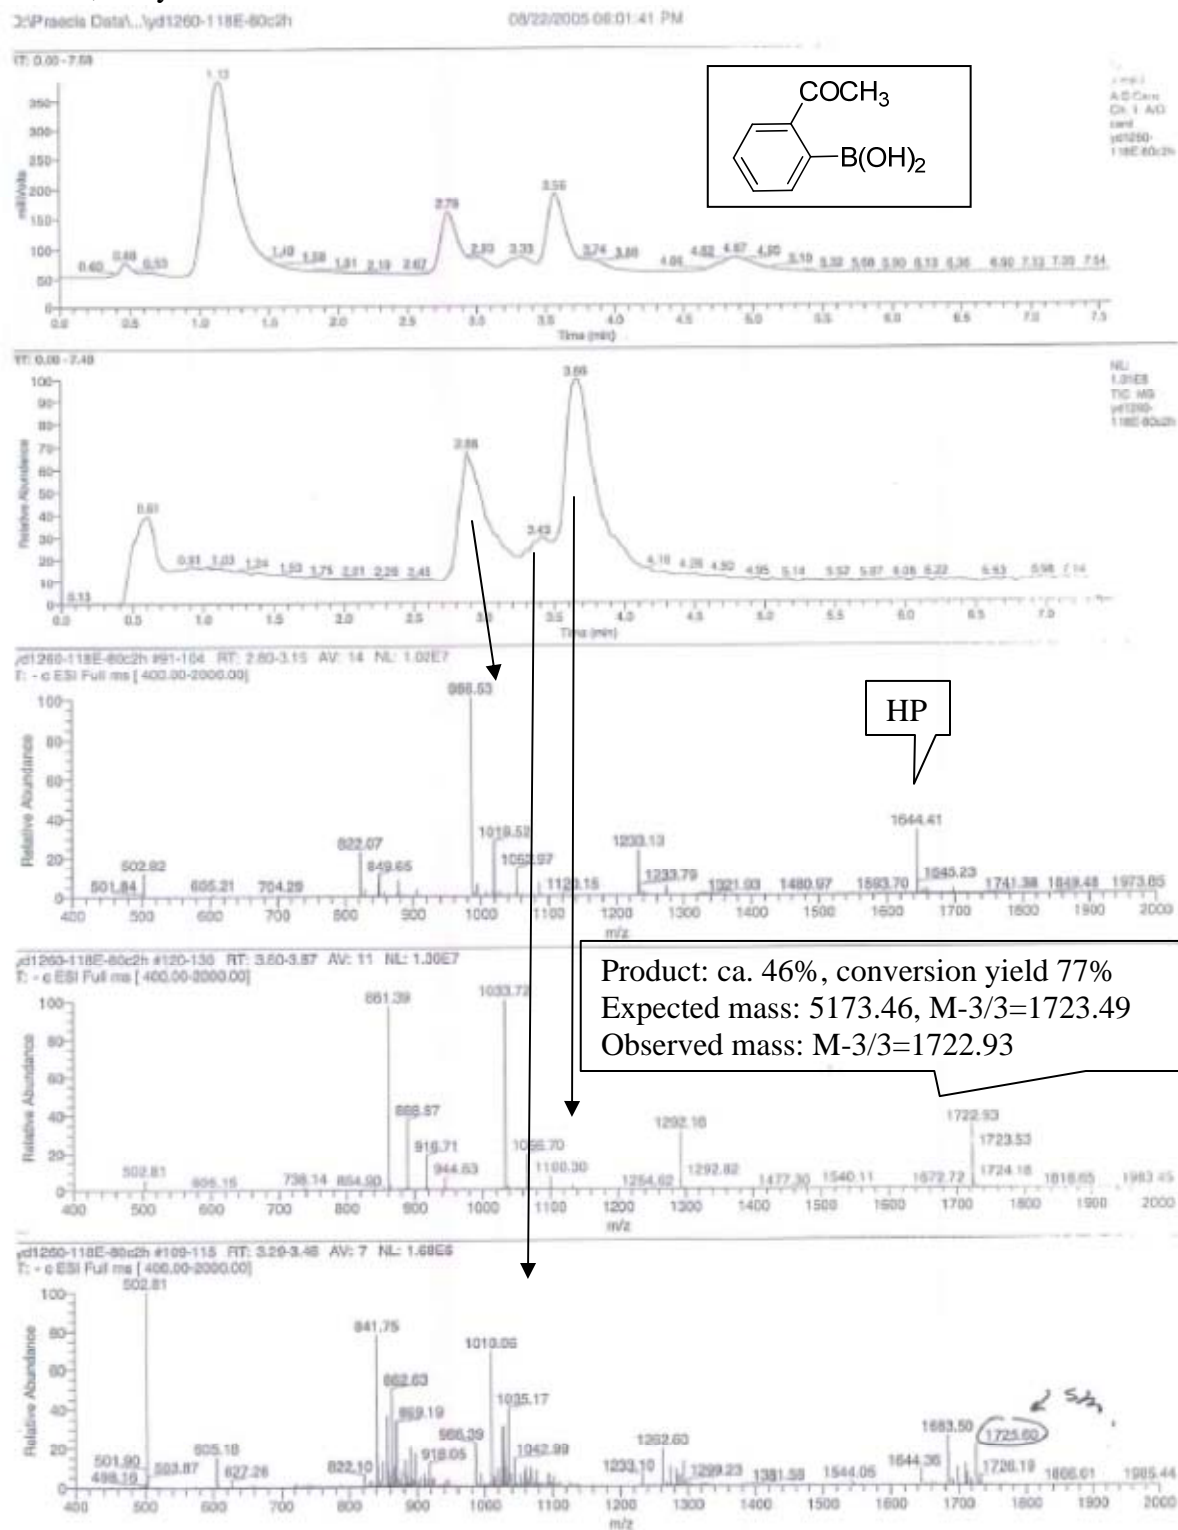

Table 1, entry 6B:

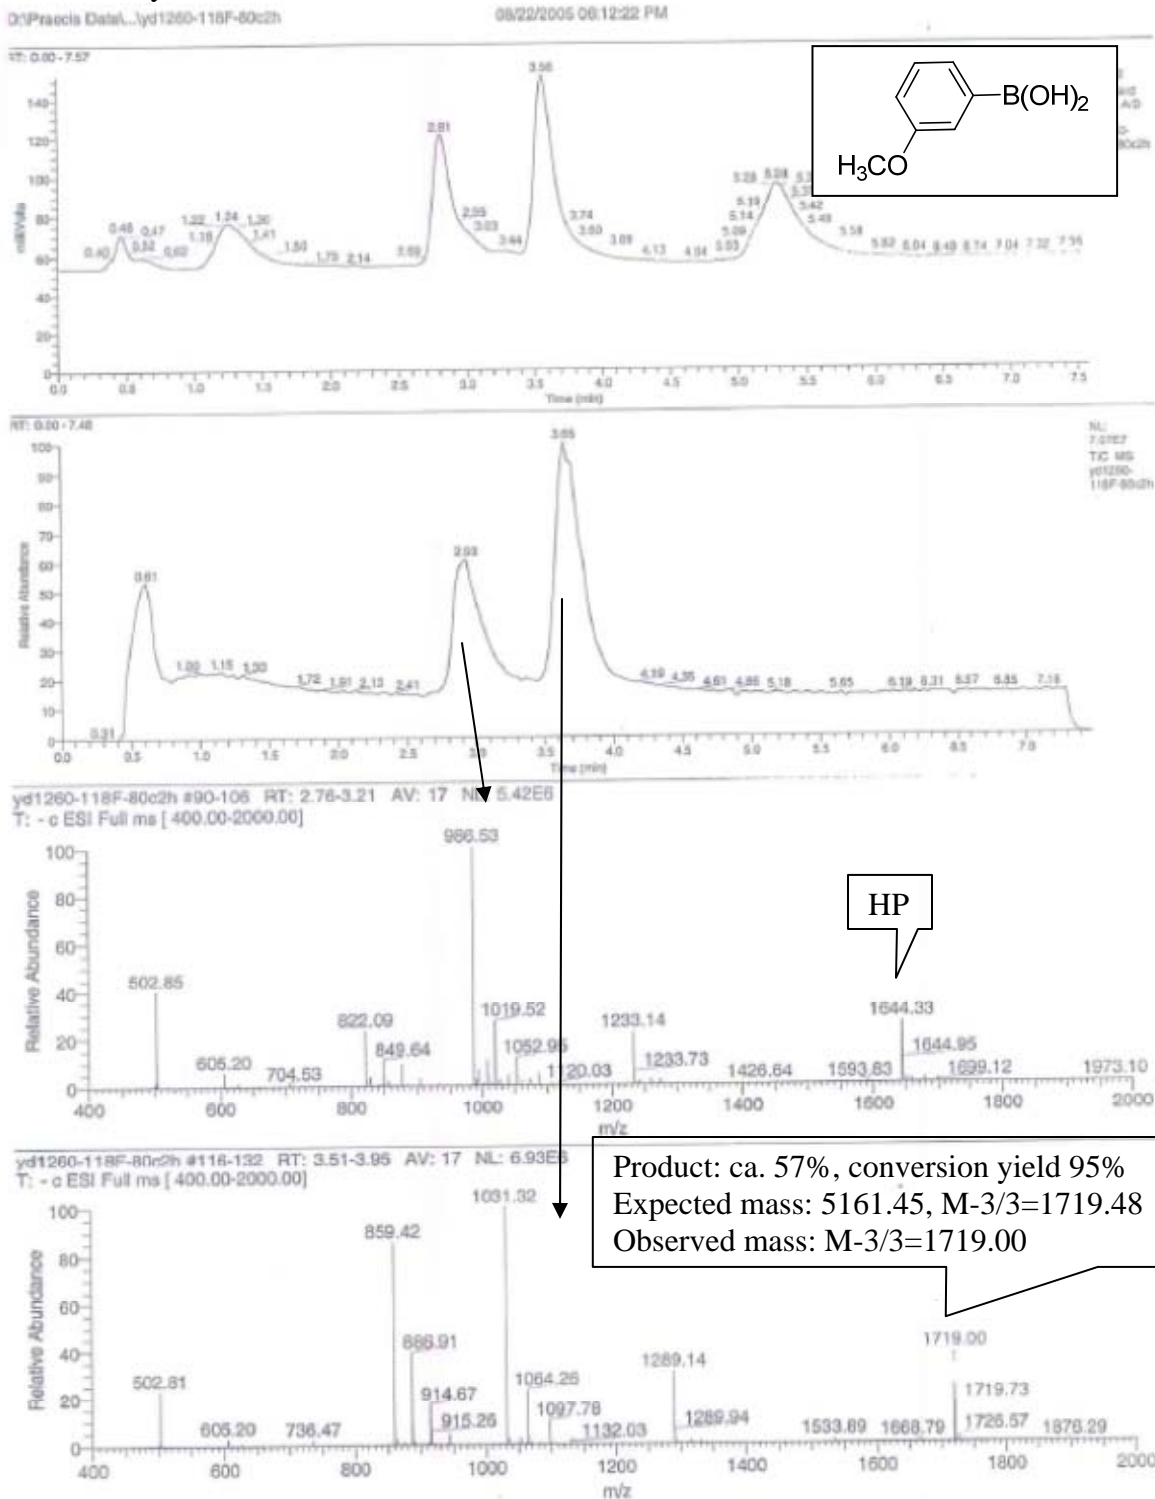

Table 1, entry 7B:

C:\Praecls Data\...yd1260-118H-80c2h

08/22/2005 06:33:43 PM

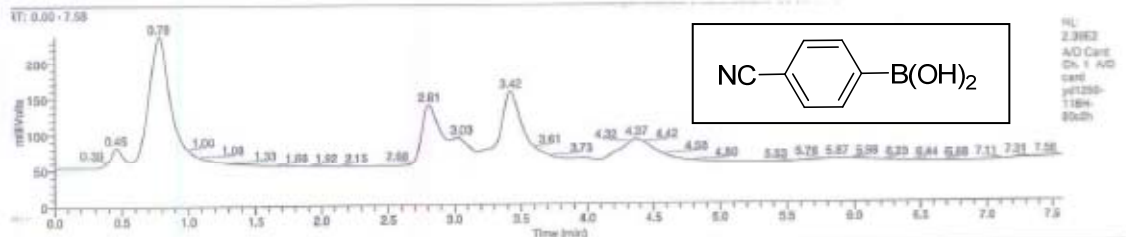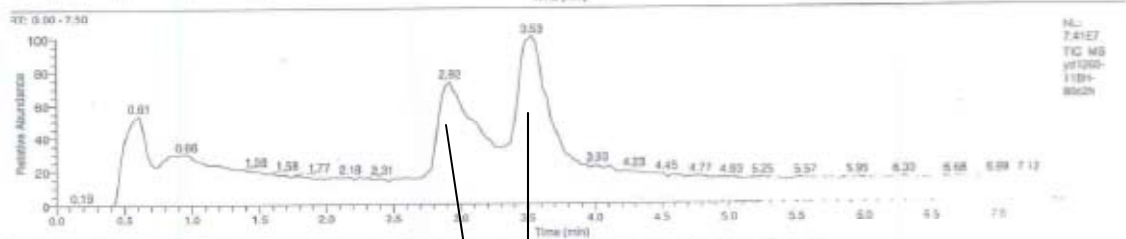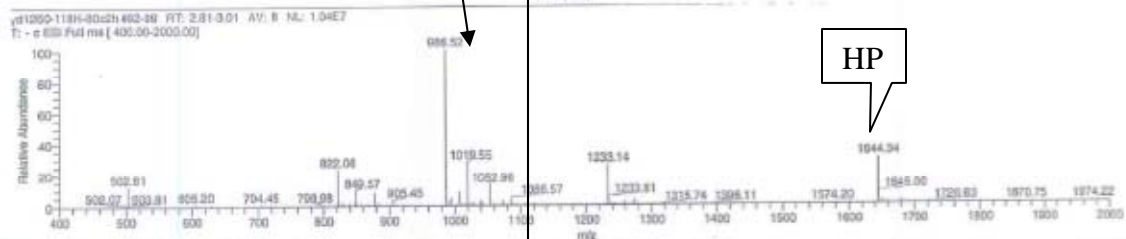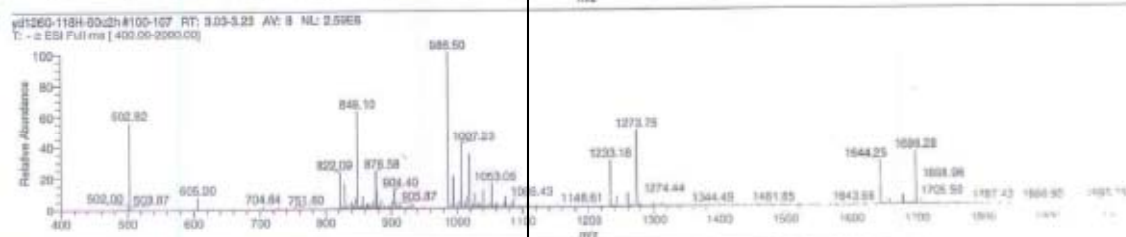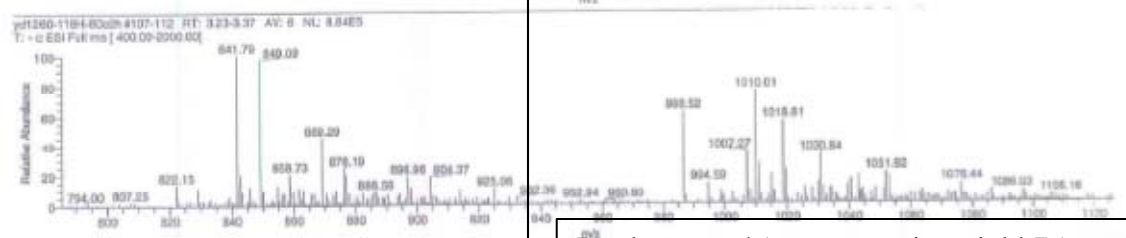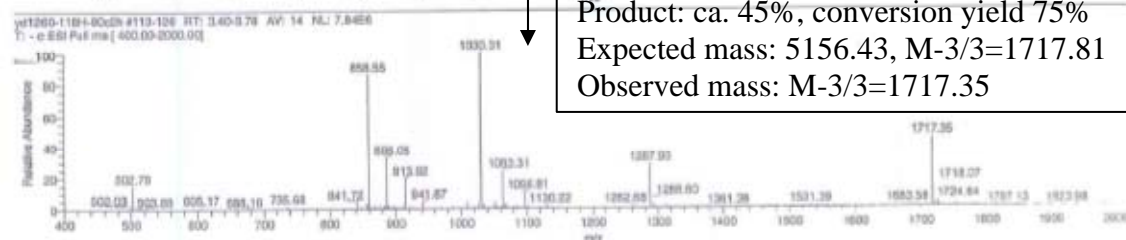

Product: ca. 45%, conversion yield 75%  
Expected mass: 5156.43, M-3/3=1717.81  
Observed mass: M-3/3=1717.35

#### Preparation of HP-4

A solution of **HP** in pH9.4 borate buffer (250 mM) (1  $\mu$ mol, 300  $\mu$ L) was added 40 equivalents of 4-bromobenzoic acid (8.1 mg in 70  $\mu$ L of DMF), followed by 40 equivalents of DMT-MM (10.9 mg in 70  $\mu$ L of water). The reaction was allowed to proceed at room temperature for 5 hours. To the reaction mixture was added piperidine (88  $\mu$ L, 20% in volume). The reaction was allowed to proceed at room temperature for 5 mins, followed by adding 10% 5 N NaCl water solution and 2.5 times volume of absolute EtOH to precipitate the DNA. The pellet was redissolved in water and it will be used directly for the next step.

**HP-4**: expected mass 5120.20 ( $M-5/5=1023.04$ ), observed 5120.5 ( $M-5/5=1023.06$ )

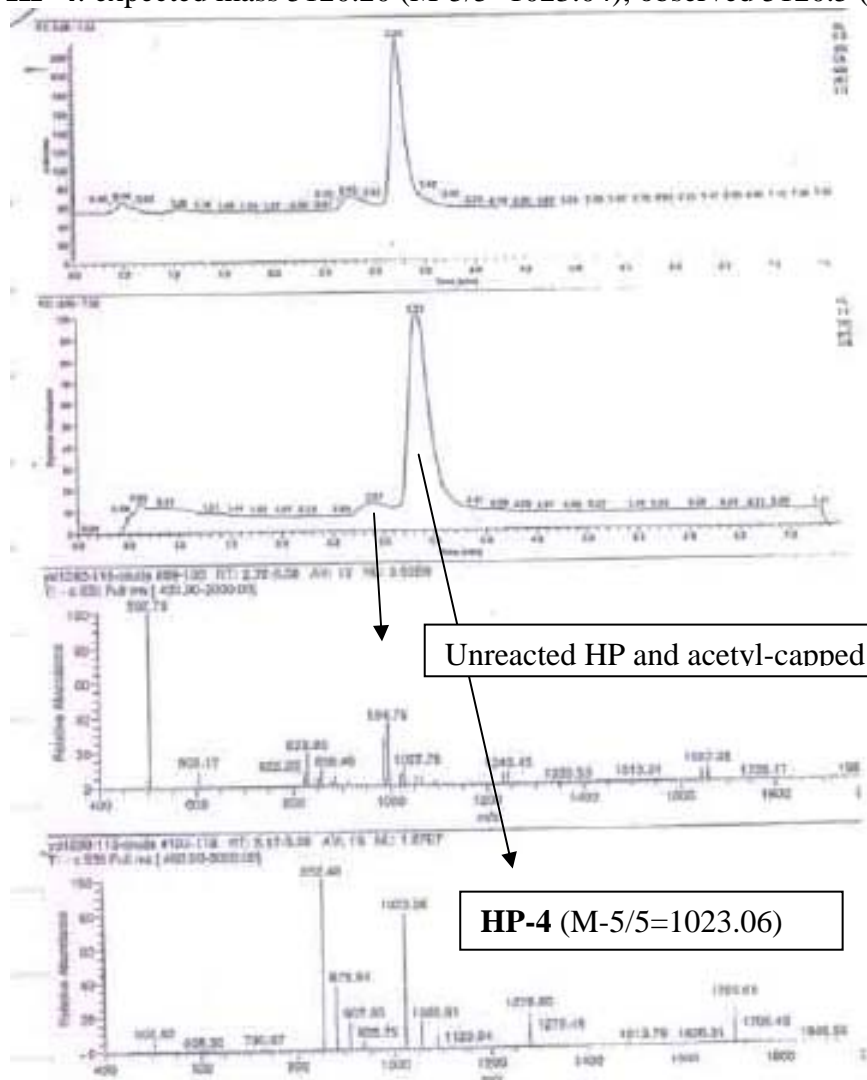

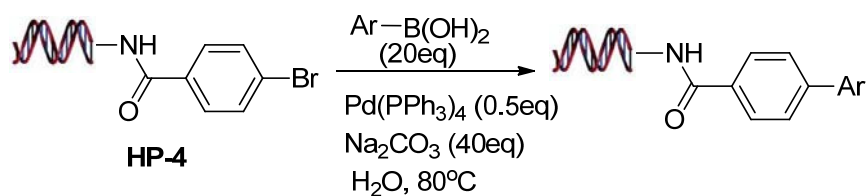

General procedure for the coupling of **HP-4** with boronates in Table 1.

A 1 mM solution of **HP-4** in water (20 nmol, 20  $\mu\text{L}$ ) was added 20 equivalents of boronate (0.5  $\mu\text{L}$ , 800 mM in DMA) and 40 equivalents of  $\text{Na}_2\text{CO}_3$  (0.5  $\mu\text{L}$ , 1.6 M in water), followed by 0.5 equivalent of degassed  $\text{Pd(PPh}_3)_4$  (2  $\mu\text{L}$ , 5 mM in  $\text{CH}_3\text{CN}$ ). The reaction was allowed to proceed at 80  $^\circ\text{C}$  for 4 hours.

Table 1, Entry 1C: LCMS @ 4 h

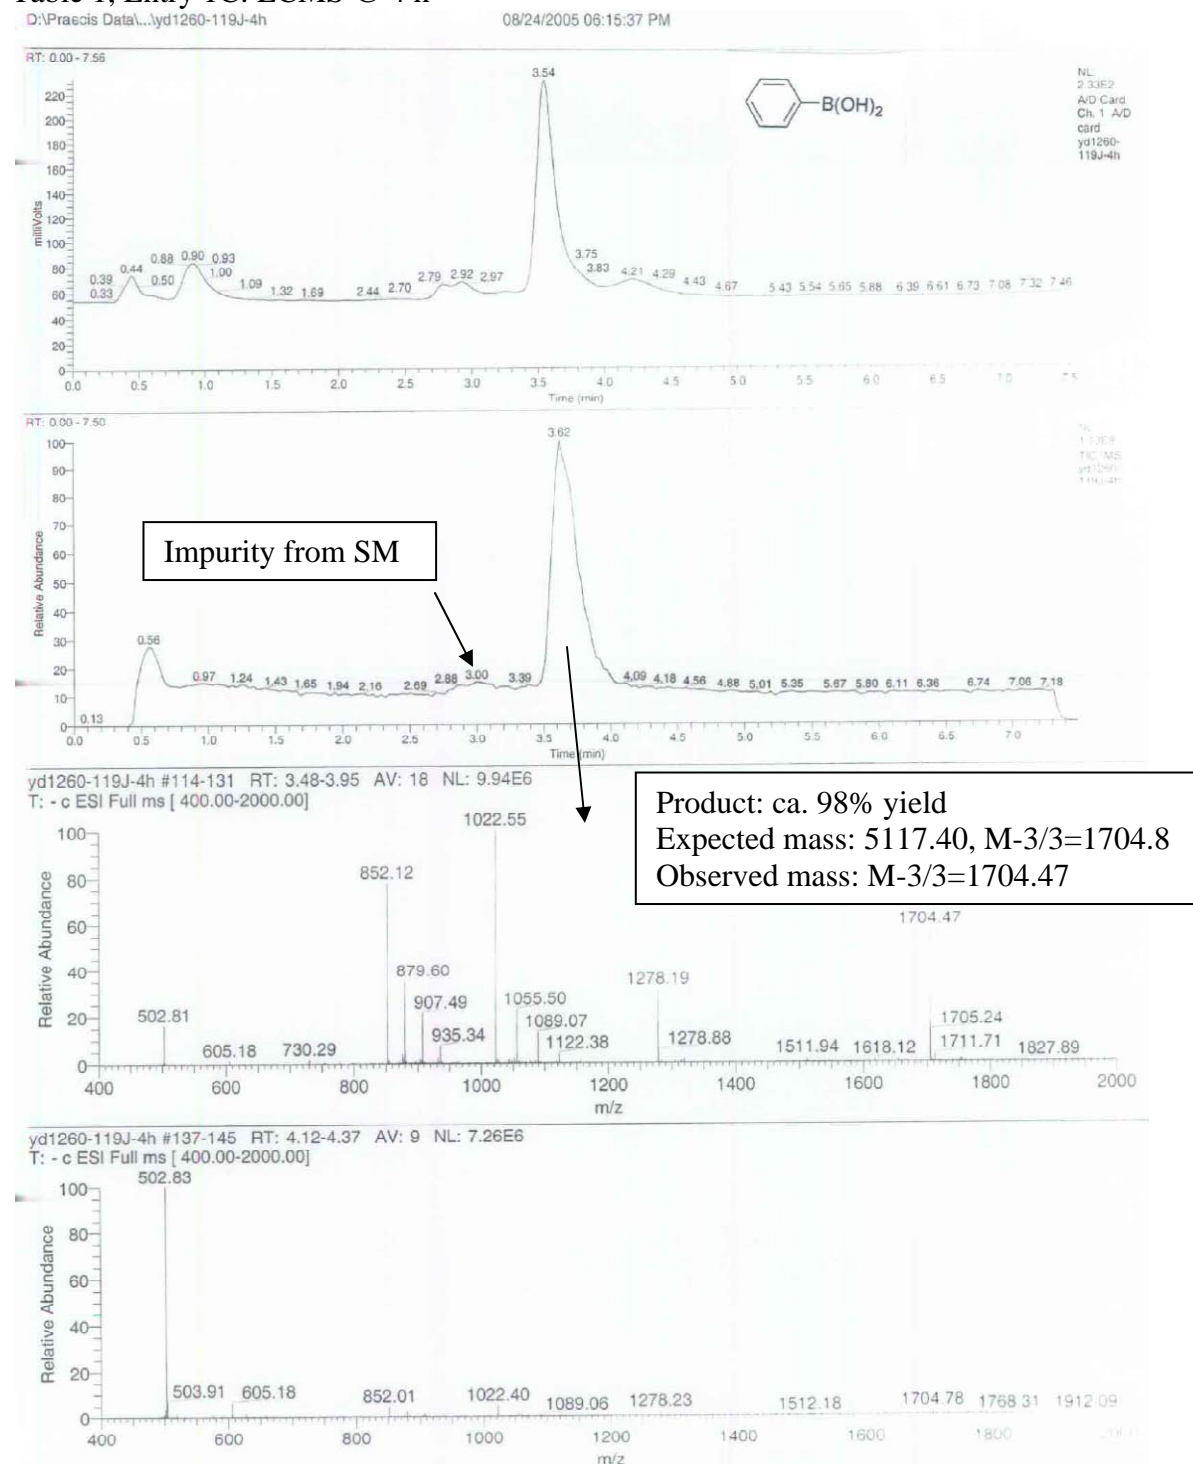



Table 1, entry 1C: LCMS @ 21 h

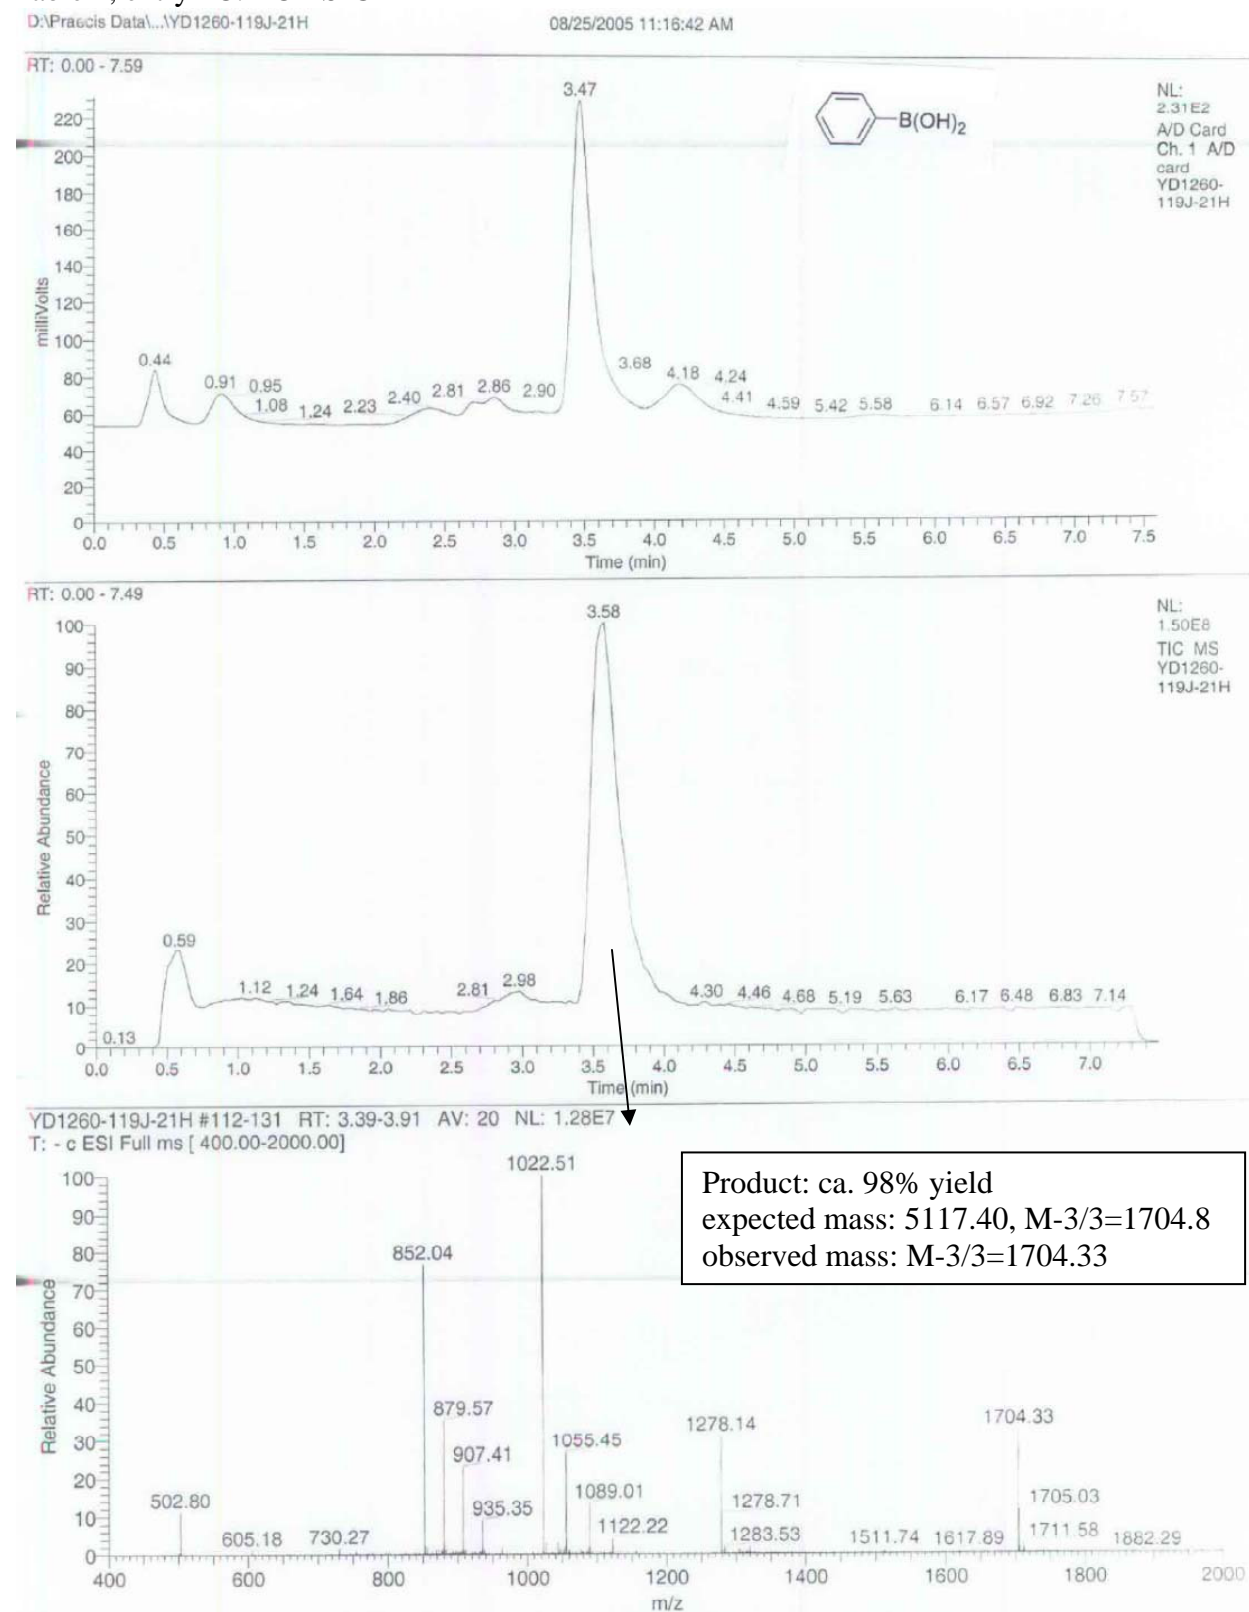



Table 1, entry 2C: LCMS @ 4 h

D:\Praecis Data\...yd1260-1191-4h

08/24/2005 06:04:58 PM

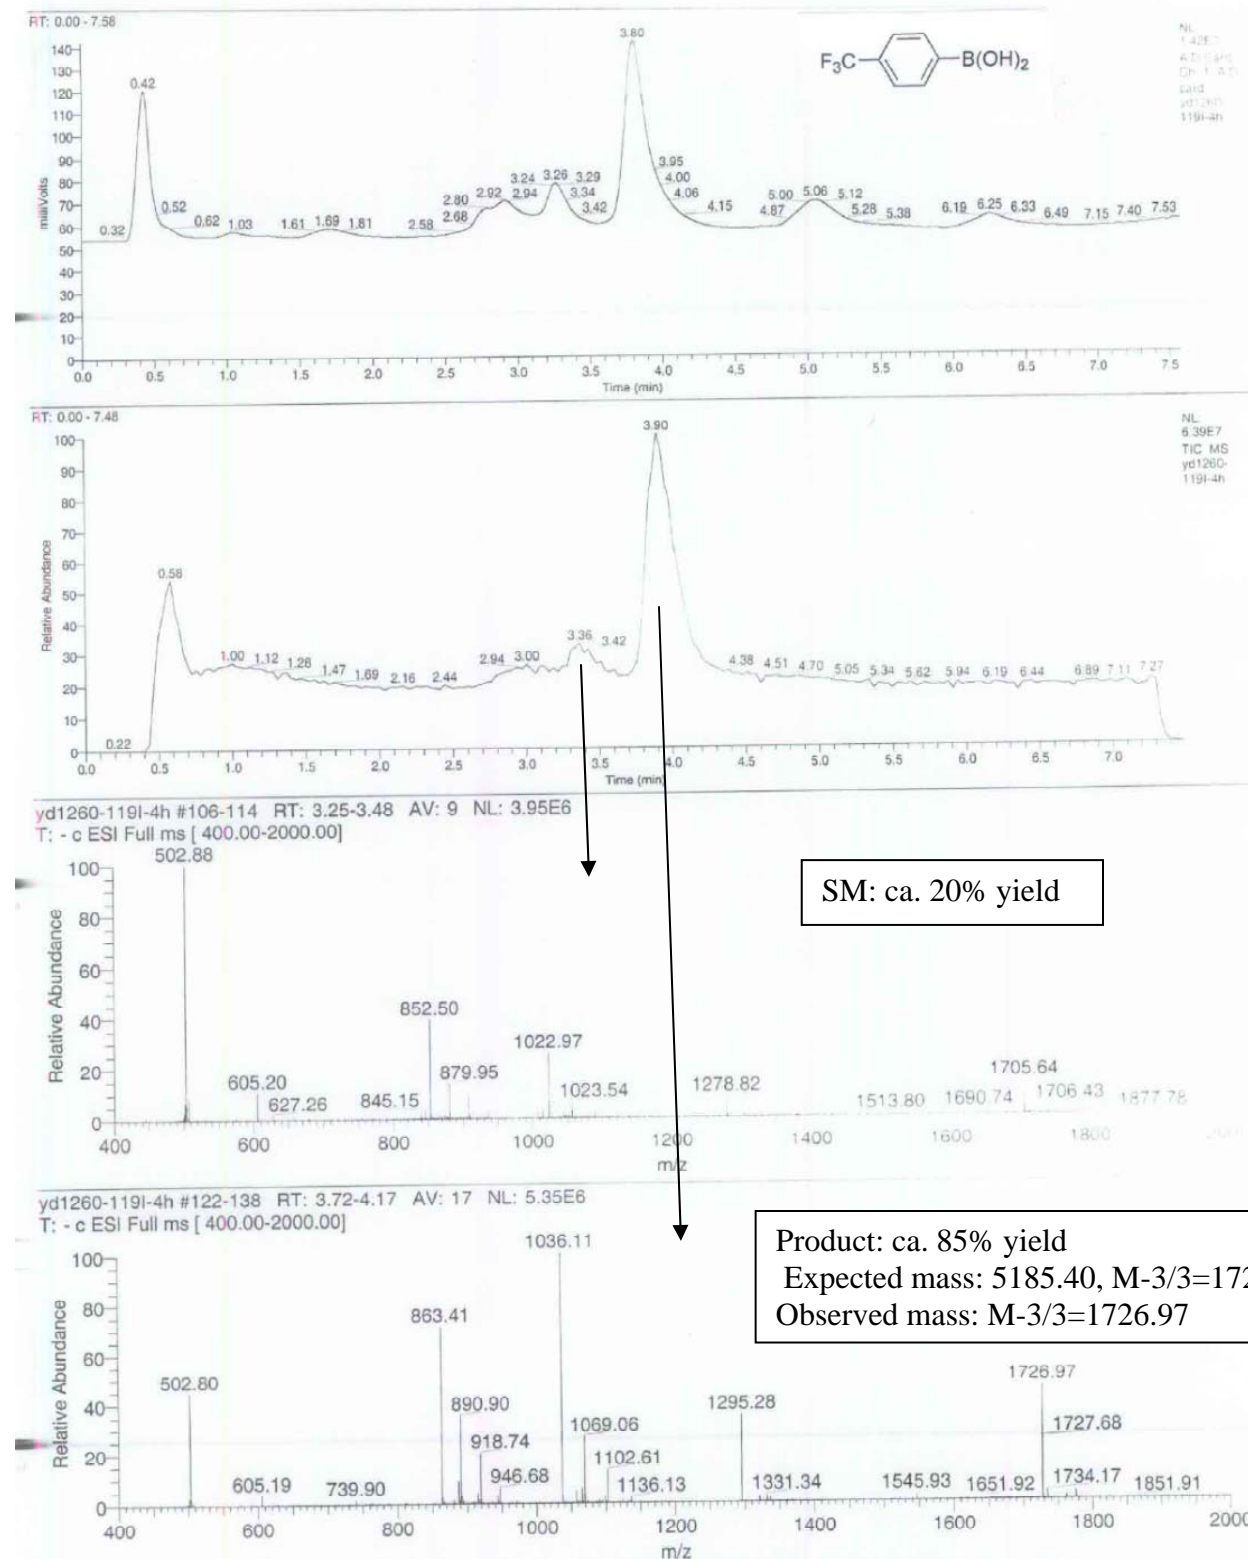

Table 1, entry 2C: LCMS @ 21 h

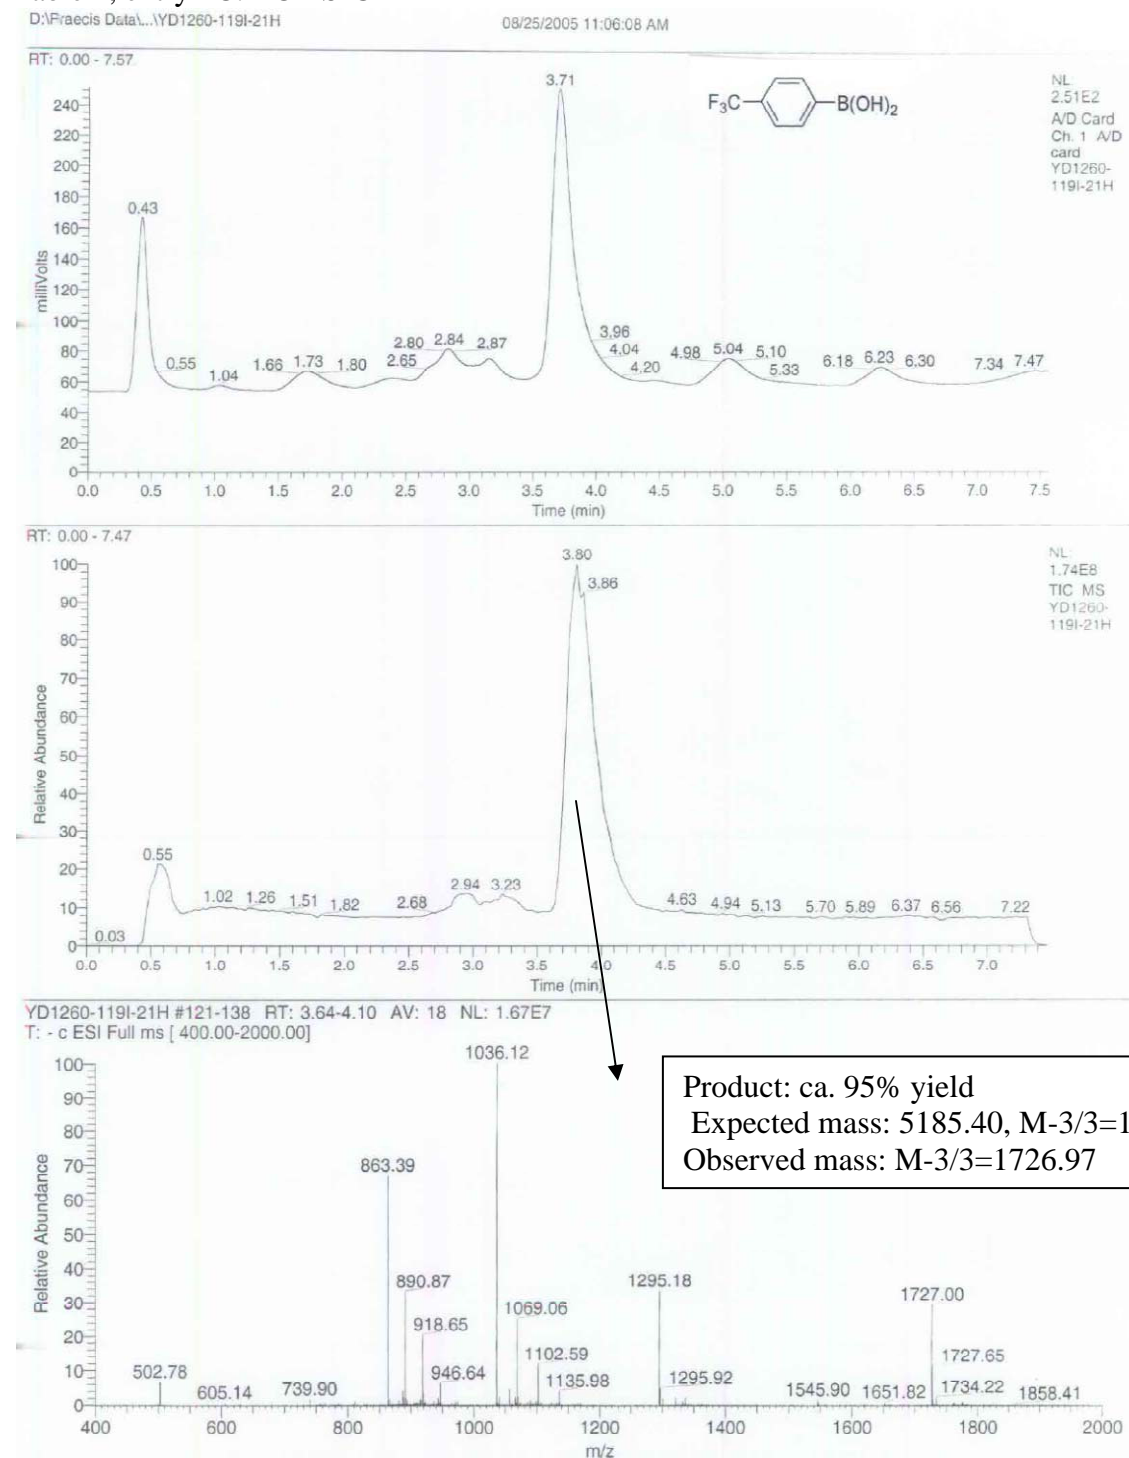

Table 1, entry 3C: LCMS @ 4 h

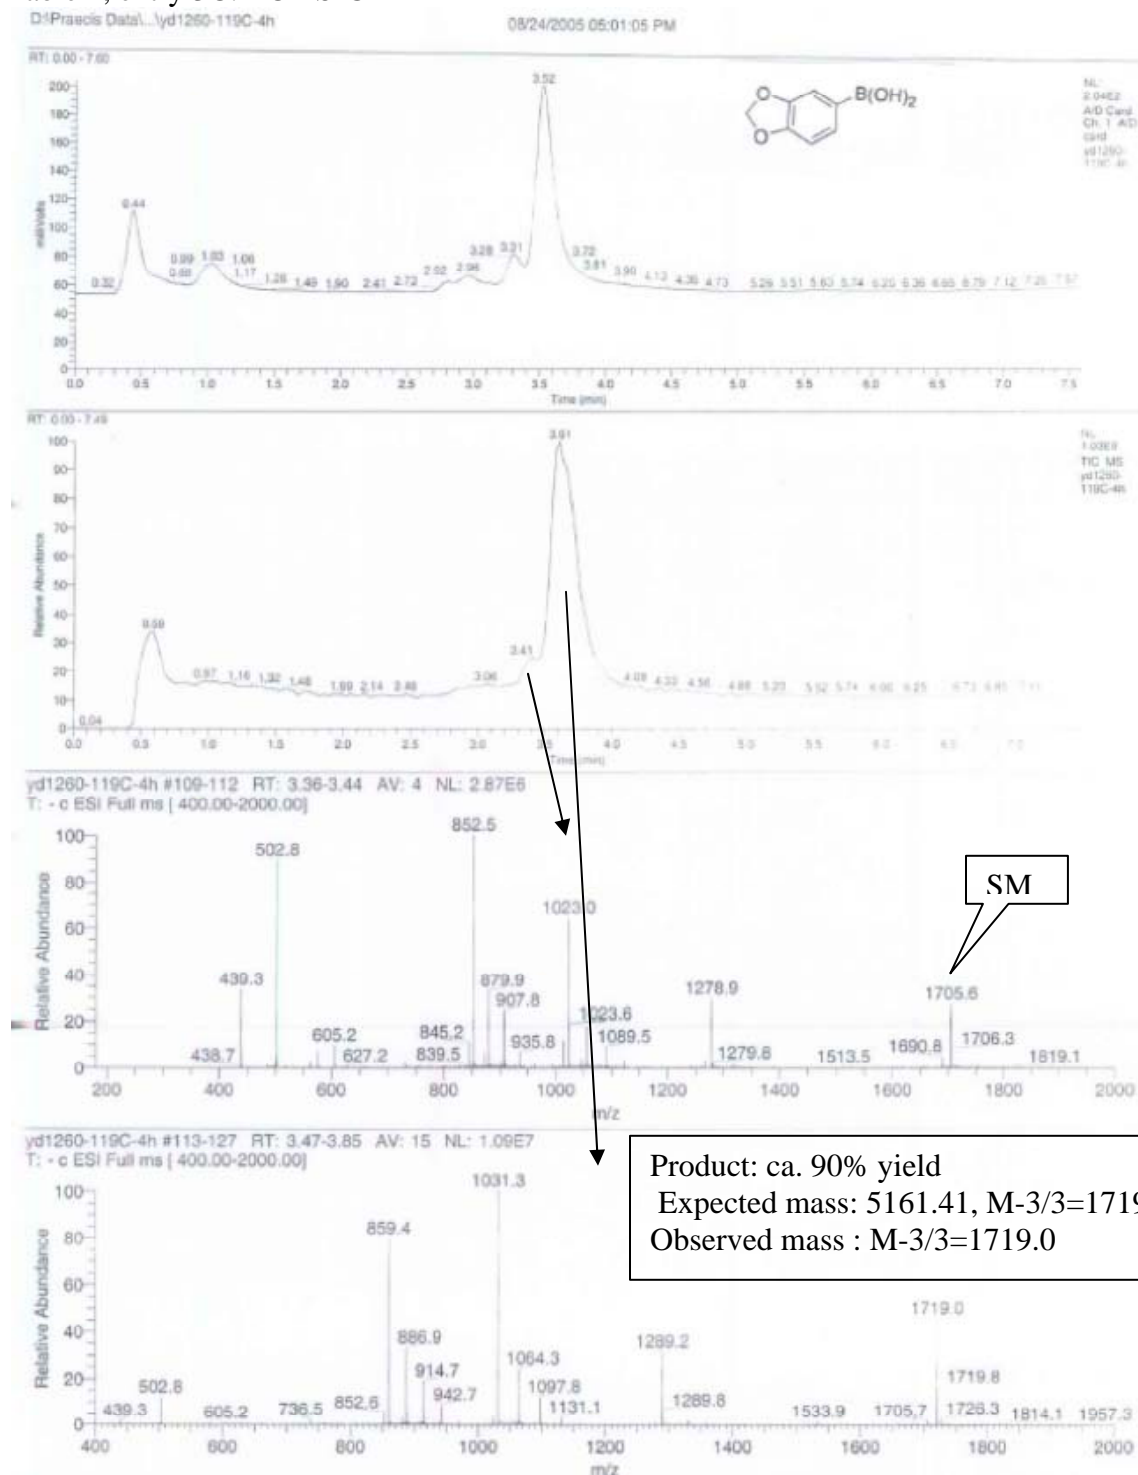

Table 1, entry 3C: LCMS @ 21 h

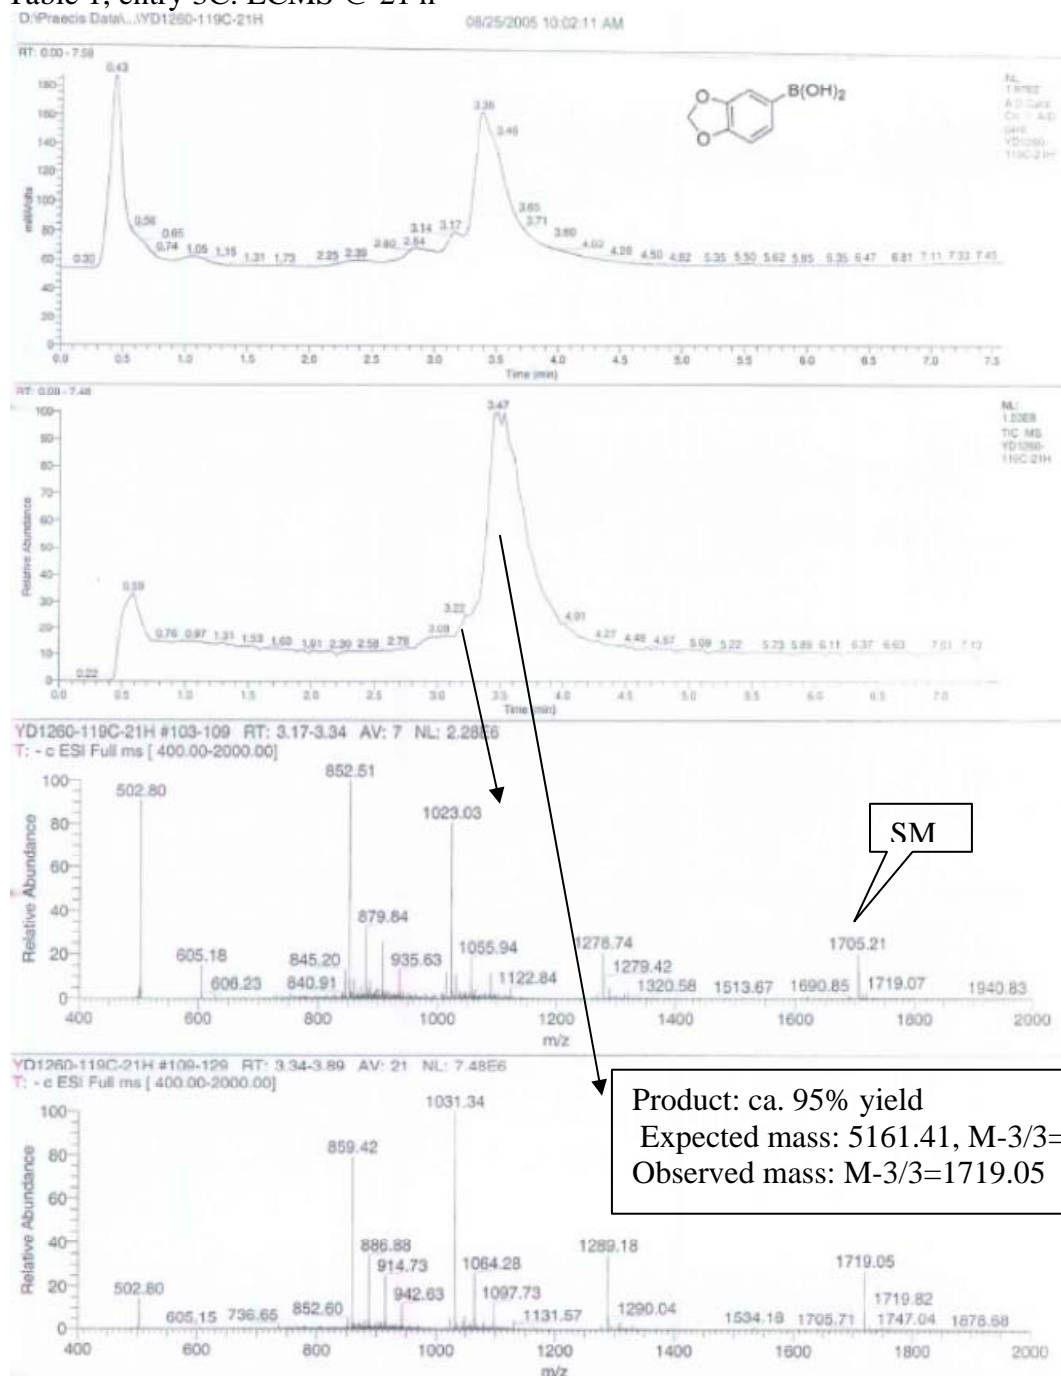

Table 1, entry 4C: LCMS @ 4 h

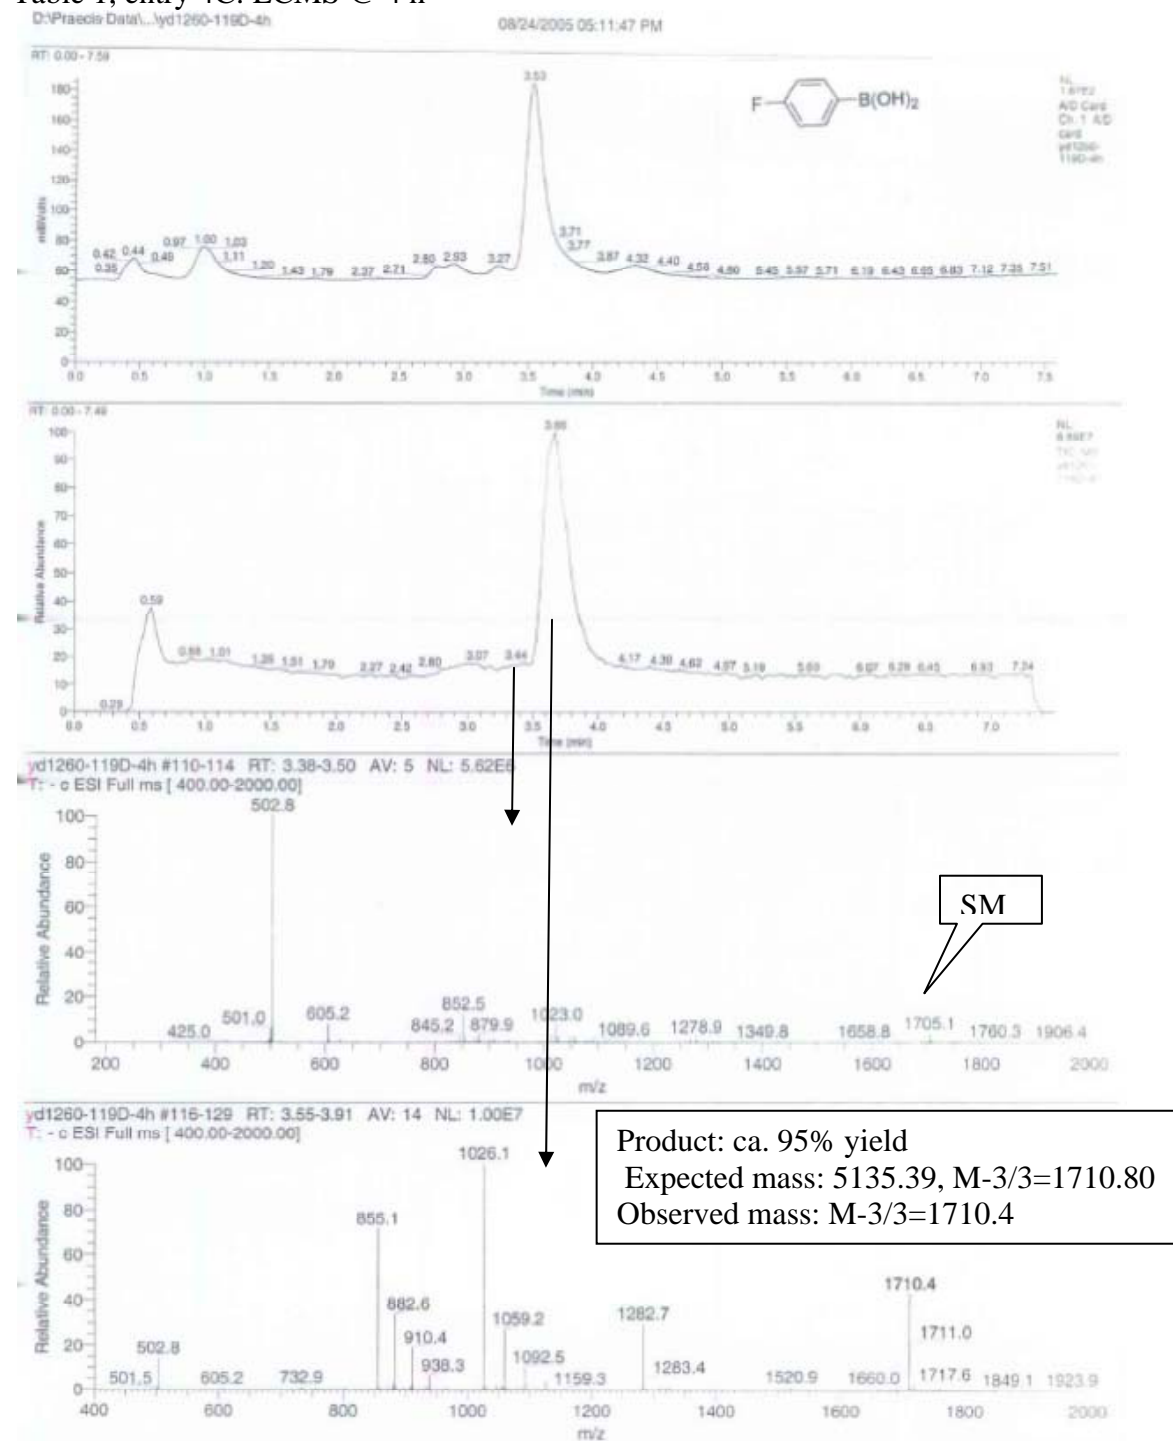

Table 1, entry 4C: LCMS @ 21 h

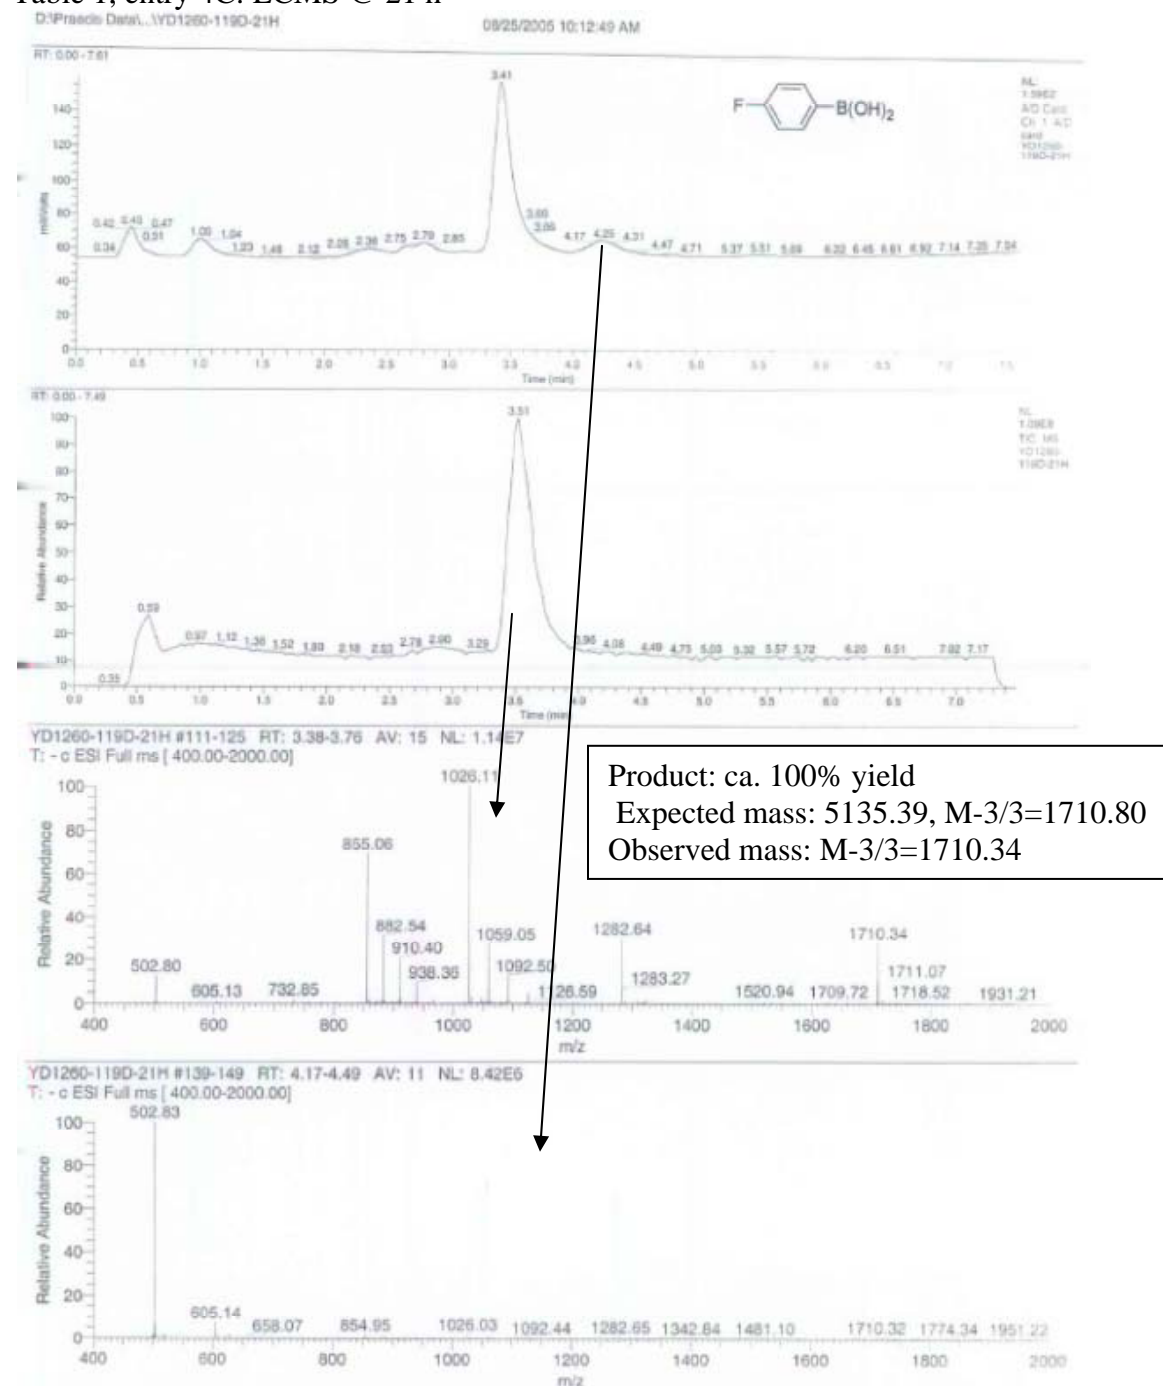



Table 1, entry 5C: LCMS @ 4 h

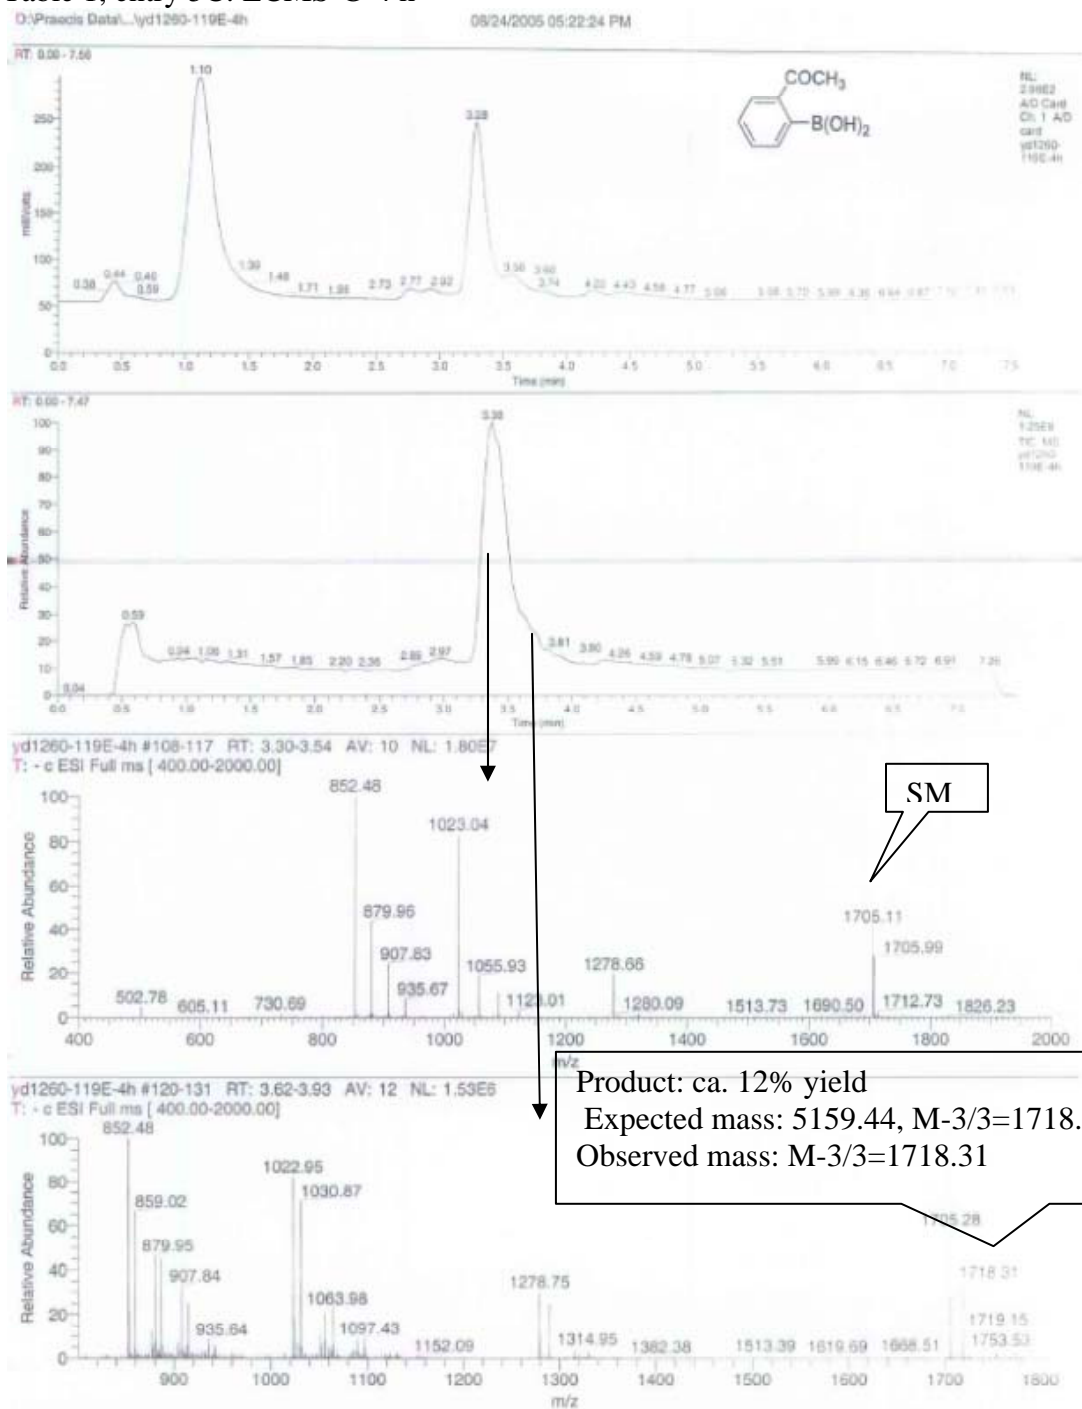

Table 1, entry 5C: LCMS @ 21 h

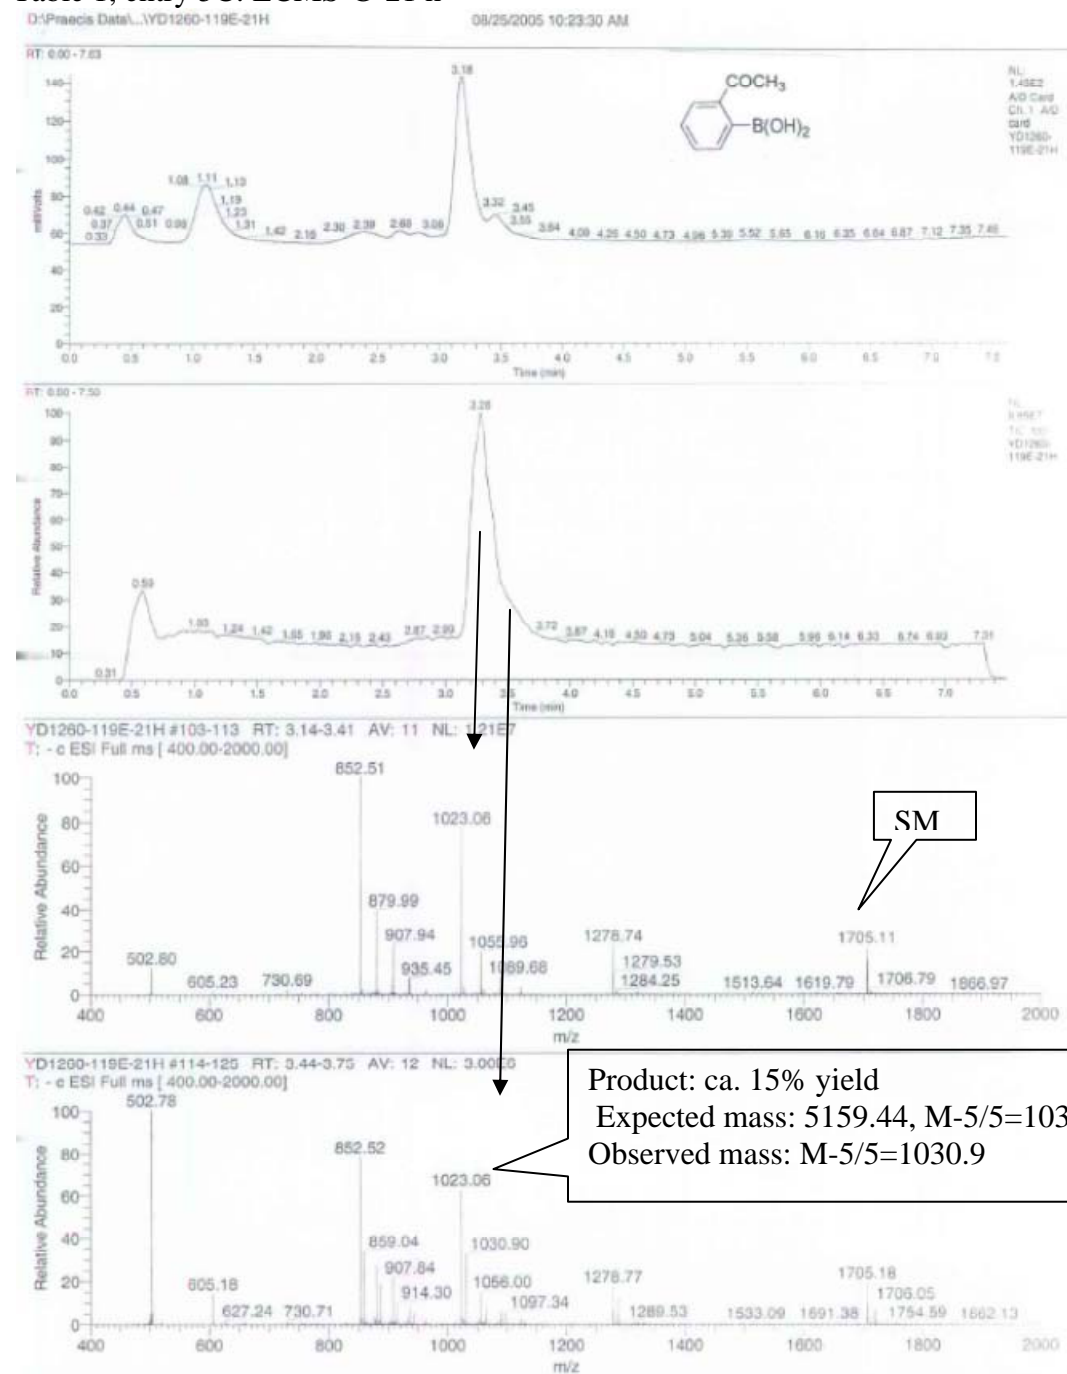



Table 1, entry 6C: LCMS @ 4 h

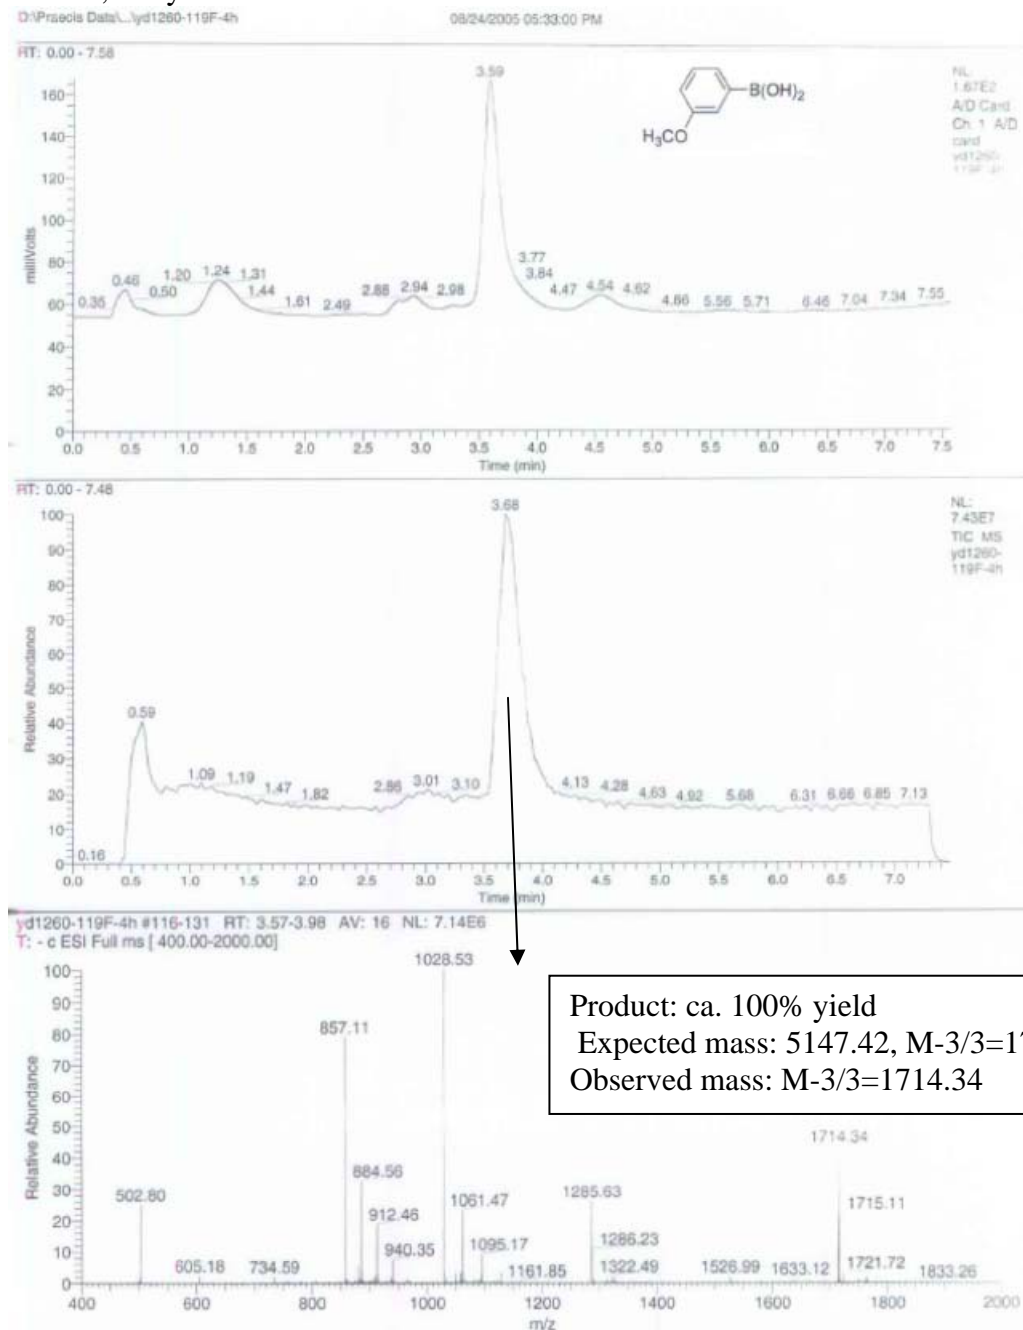

Table 3, entry 6: LCMS @ 21 h was very similar to LCMS @ 4 h

Table 1, entry 7C: LCMS @ 4 h

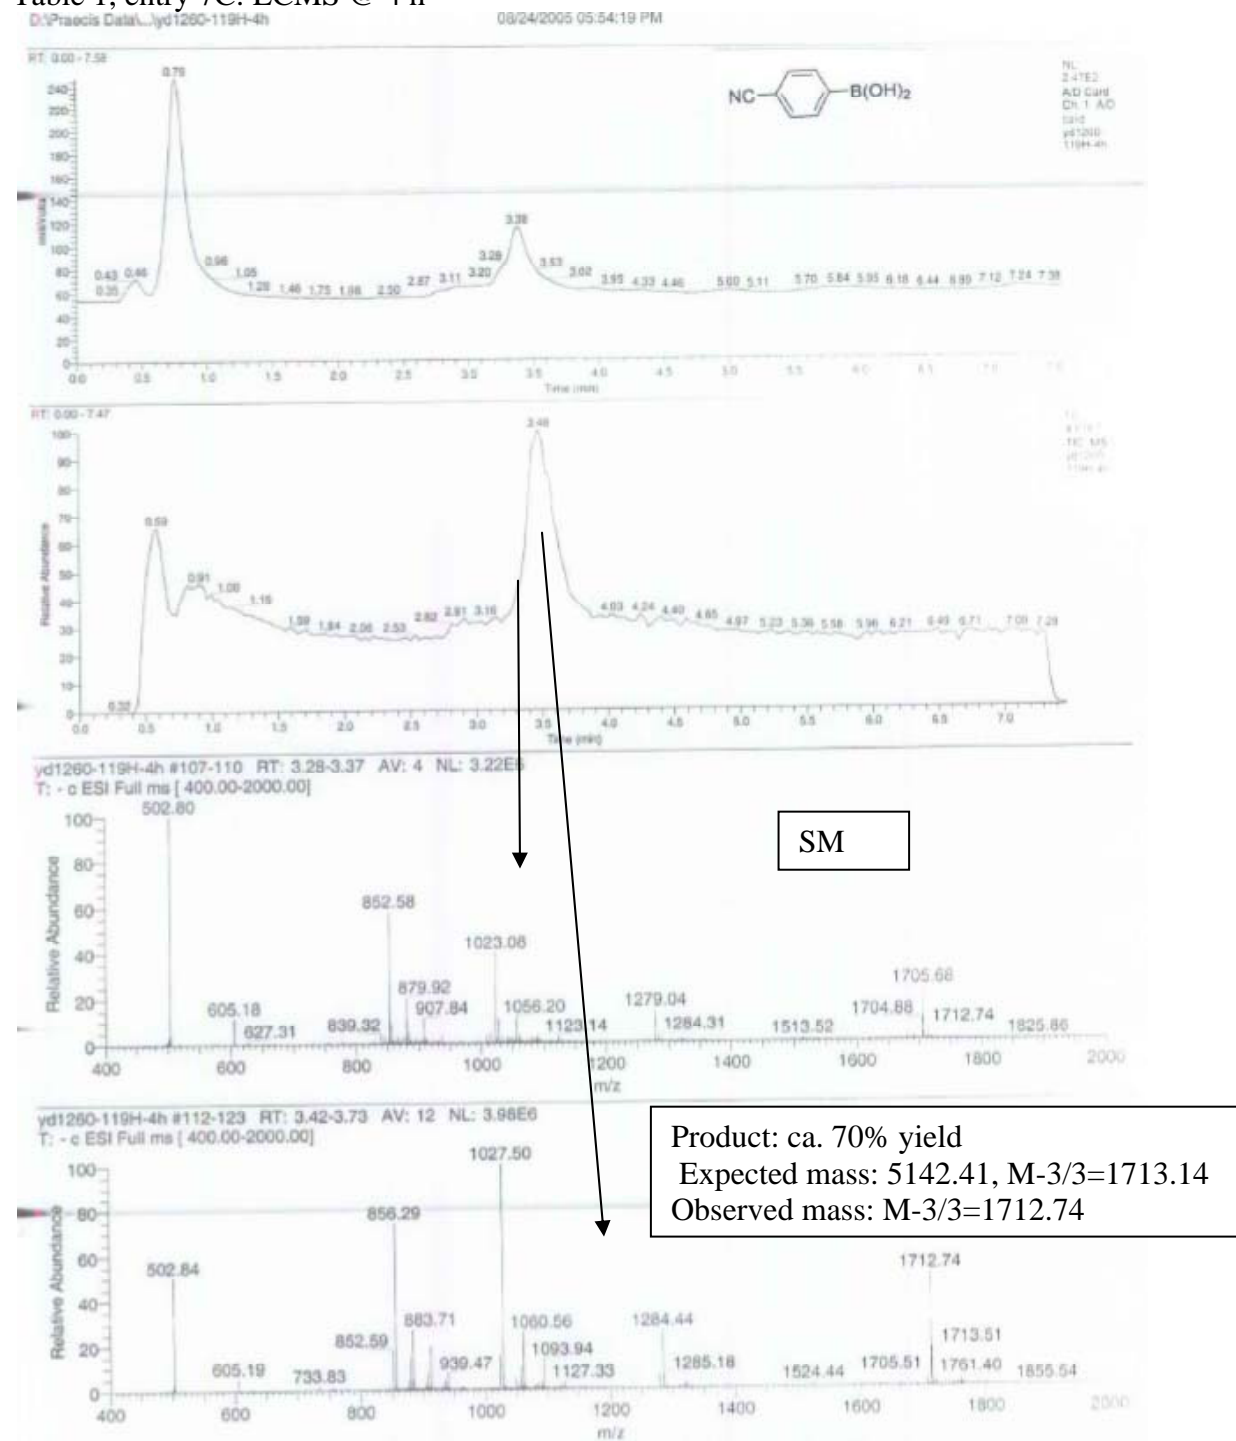

Table 1, entry 7C: LCMS @ 21 h

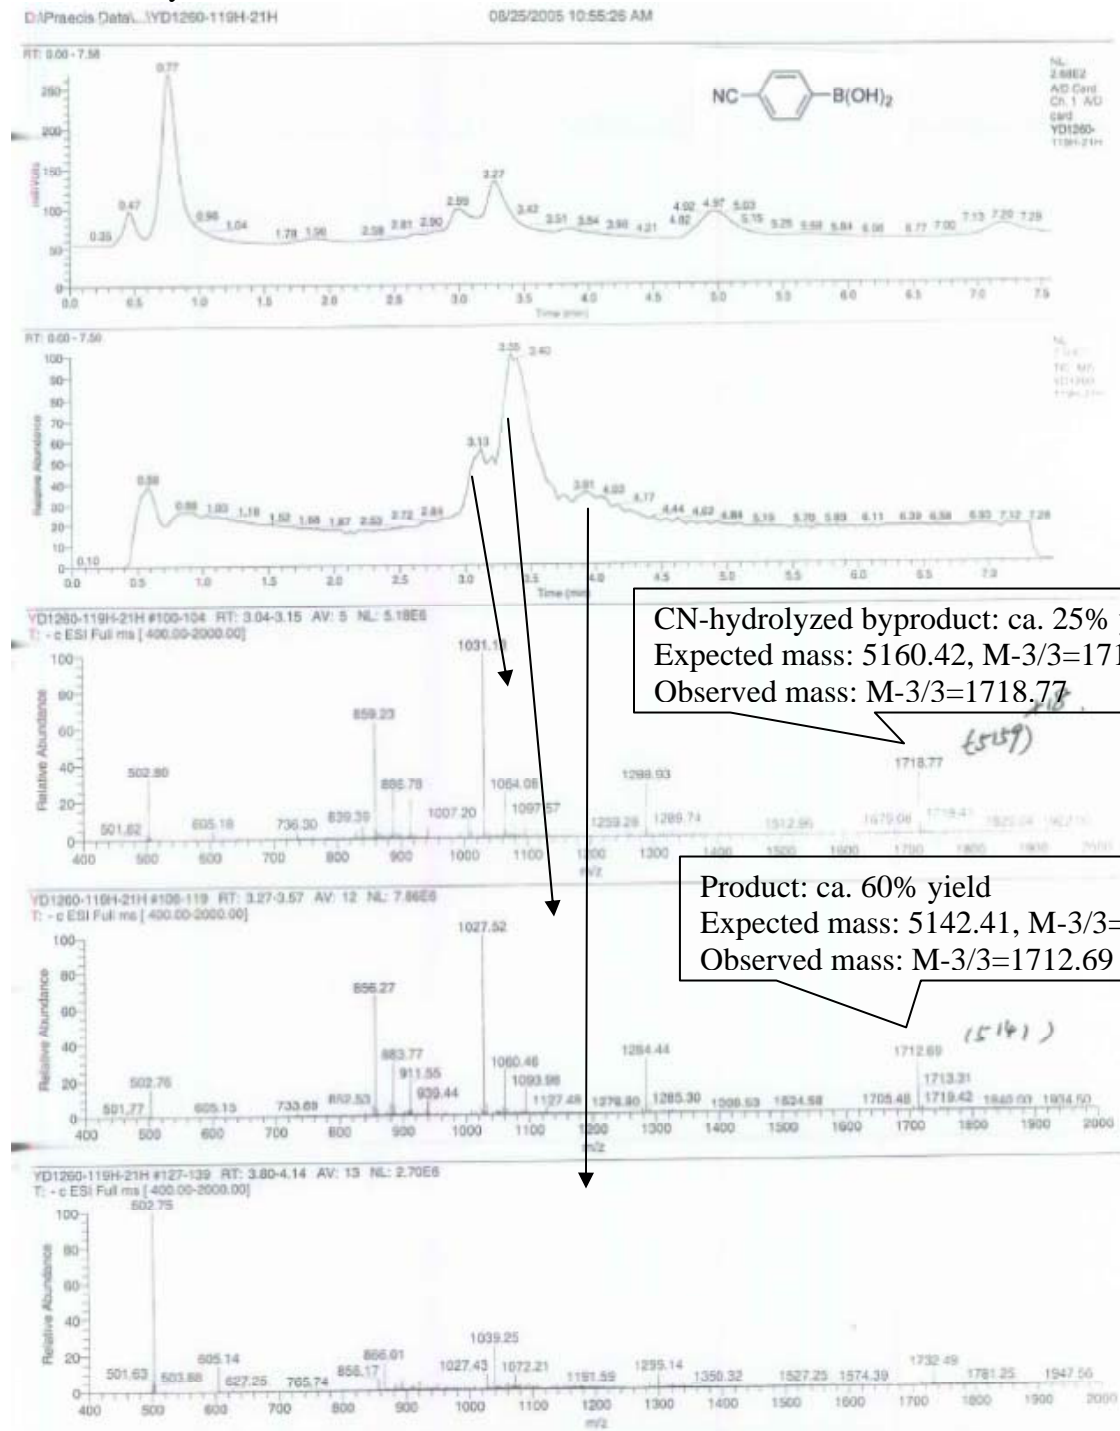

General procedure for the coupling of **HP-1** with boronic esters in Table 2.

A 1 mM solution of **HP-1** in water (20 nmol, 20  $\mu$ L) was added 20 equivalents of boronate (0.5  $\mu$ L, 800 mM in DMA) and 40 equivalents of  $\text{Na}_2\text{CO}_3$  (0.5  $\mu$ L, 1.6 M in water), followed by 0.5 equivalent of degassed  $\text{Pd}(\text{PPh}_3)_4$  (3  $\mu$ L, 3.5 mM in  $\text{CH}_3\text{CN}$ ). The reaction was allowed to proceed at 80  $^\circ\text{C}$  for 3 hours 20 mins.

Table 2, entry 1:

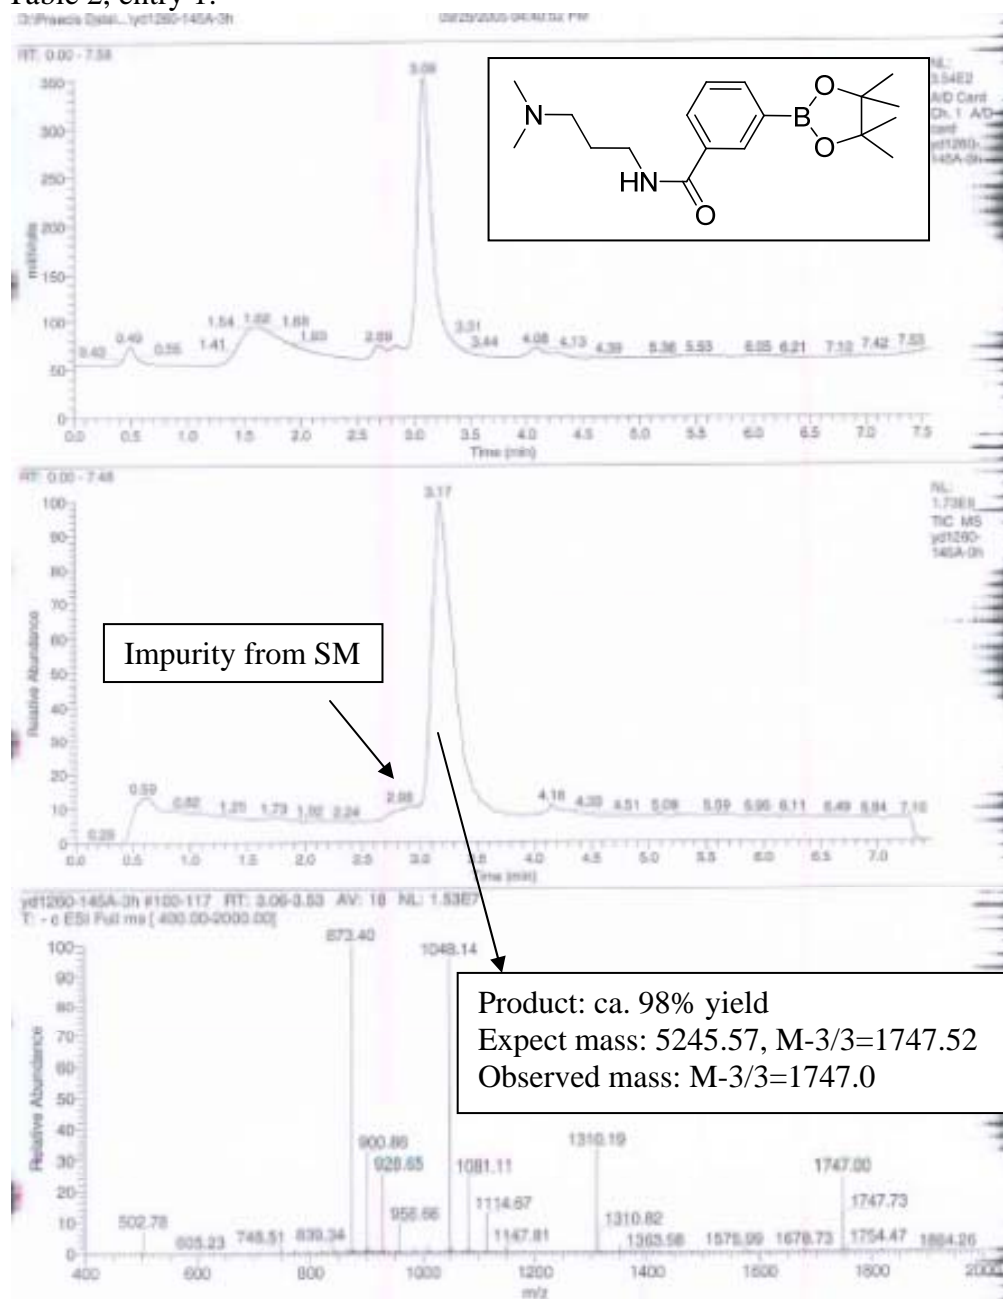

Table 2, entry 2:

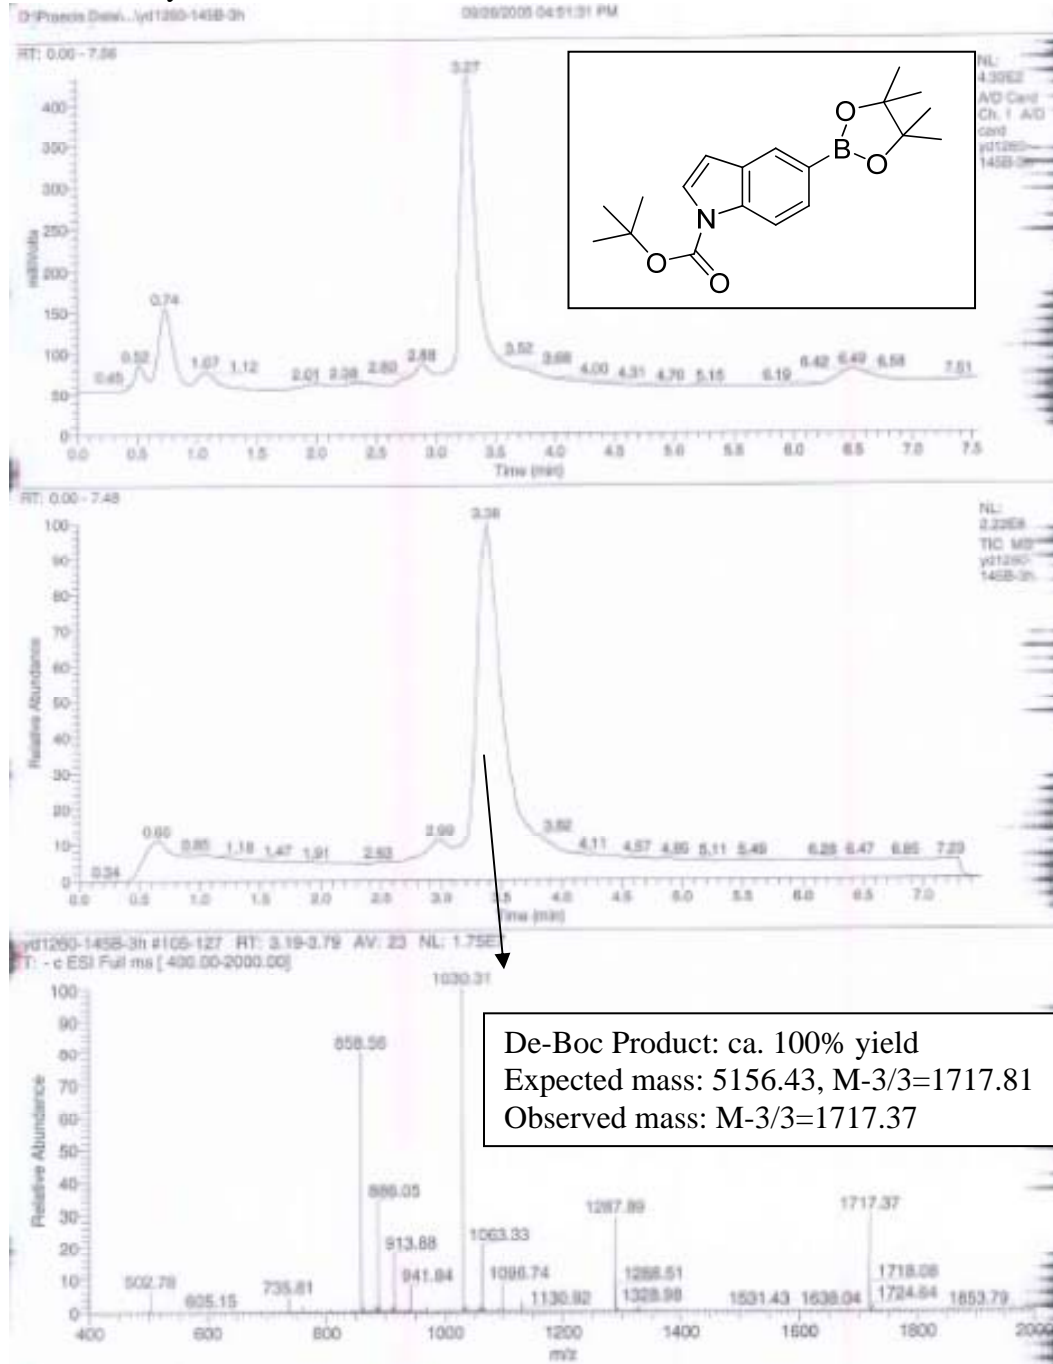

Table 2, entry 3:

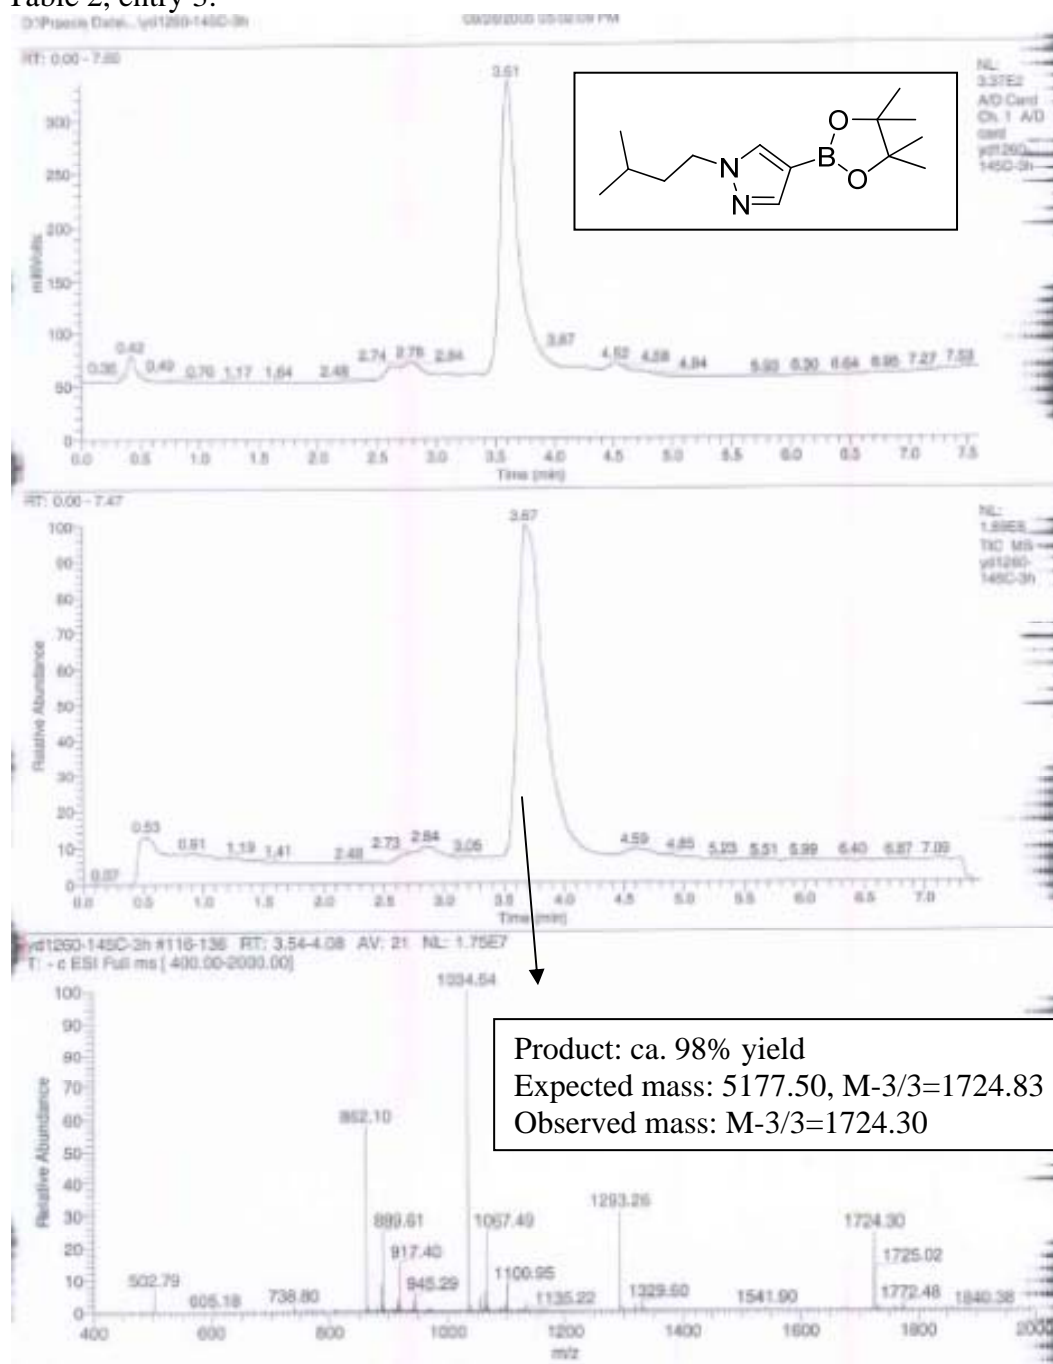



Prados Ochoa, J. / 145D-3n

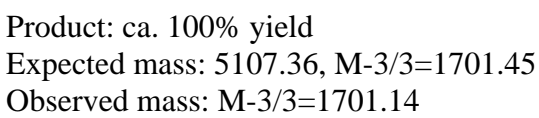

Table 2, entry 5:

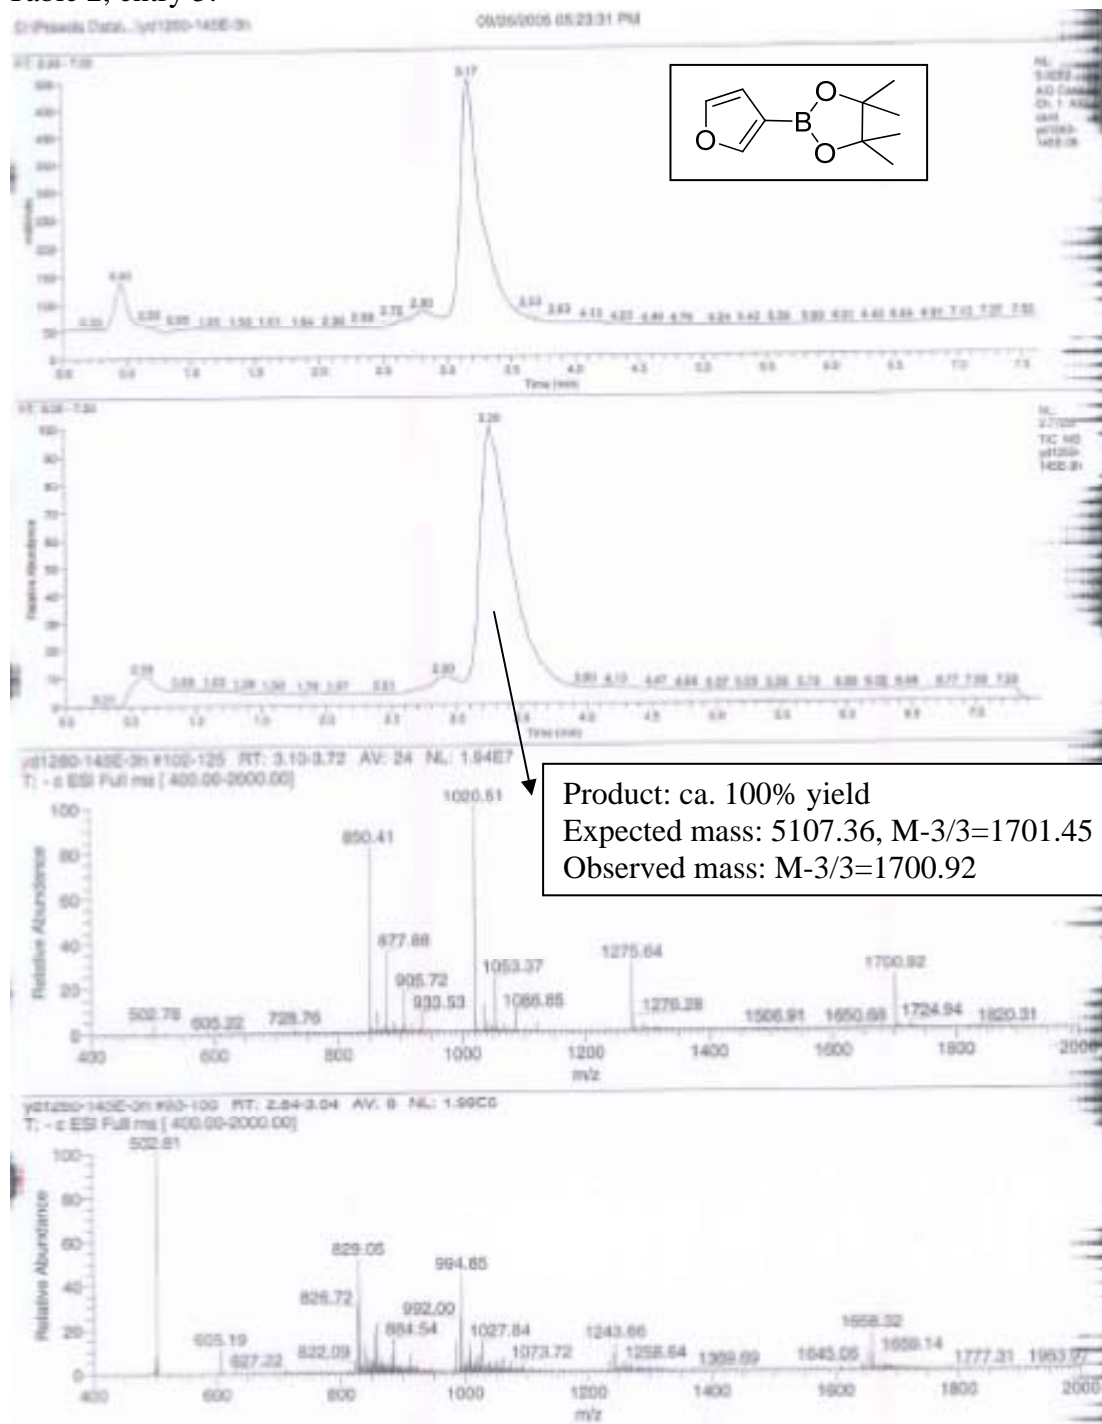

09/20/2009 05:34:12 PM

01:57:16:00 Data: \vd1280-145F-3n

0.00 0.05 0.10 0.15 0.20 0.25 0.30 0.35 0.40 0.45 0.50 0.55 0.60 0.65 0.70 0.75 0.80 0.85 0.90 0.95 1.00 1.05 1.10 1.15 1.20 1.25 1.30 1.35 1.40 1.45 1.50 1.55 1.60 1.65 1.70 1.75 1.80 1.85 1.90 1.95 2.00 2.05 2.10 2.15 2.20 2.25 2.30 2.35 2.40 2.45 2.50 2.55 2.60 2.65 2.70 2.75 2.80 2.85 2.90 2.95 3.00 3.05 3.10 3.15 3.20 3.25 3.30 3.35 3.40 3.45 3.50 3.55 3.60 3.65 3.70 3.75 3.80 3.85 3.90 3.95 4.00 4.05 4.10 4.15 4.20 4.25 4.30 4.35 4.40 4.45 4.50 4.55 4.60 4.65 4.70 4.75 4.80 4.85 4.90 4.95 5.00 5.05 5.10 5.15 5.20 5.25 5.30 5.35 5.40 5.45 5.50 5.55 5.60 5.65 5.70 5.75 5.80 5.85 5.90 5.95 6.00 6.05 6.10 6.15 6.20 6.25 6.30 6.35 6.40 6.45 6.50 6.55 6.60 6.65 6.70 6.75 6.80 6.85 6.90 6.95 7.00 7.05 7.10 7.15 7.20 7.25 7.30 7.35 7.40 7.45 7.50 7.55 7.60 7.65 7.70 7.75 7.80 7.85 7.90 7.95 8.00 8.05 8.10 8.15 8.20 8.25 8.30 8.35 8.40 8.45 8.50 8.55 8.60 8.65 8.70 8.75 8.80 8.85 8.90 8.95 9.00 9.05 9.10 9.15 9.20 9.25 9.30 9.35 9.40 9.45 9.50 9.55 9.60 9.65 9.70 9.75 9.80 9.85 9.90 9.95 10.00 10.05 10.10 10.15 10.20 10.25 10.30 10.35 10.40 10.45 10.50 10.55 10.60 10.65 10.70 10.75 10.80 10.85 10.90 10.95 11.00 11.05 11.10 11.15 11.20 11.25 11.30 11.35 11.40 11.45 11.50 11.55 11.60 11.65 11.70 11.75 11.80 11.85 11.90 11.95 12.00 12.05 12.10 12.15 12.20 12.25 12.30 12.35 12.40 12.45 12.50 12.55 12.60 12.65 12.70 12.75 12.80 12.85 12.90 12.95 13.00 13.05 13.10 13.15 13.20 13.25 13.30 13.35 13.40 13.45 13.50 13.55 13.60 13.65 13.70 13.75 13.80 13.85 13.90 13.95 14.00 14.05 14.10 14.15 14.20 14.25 14.30 14.35 14.40 14.45 14.50 14.55 14.60 14.65 14.70 14.75 14.80 14.85 14.90 14.95 15.00 15.05 15.10 15.15 15.20 15.25 15.30 15.35 15.40 15.45 15.50 15.55 15.60 15.65 15.70 15.75 15.80 15.85 15.90 15.95 16.00 16.05 16.10 16.15 16.20 16.25 16.30 16.35 16.40 16.45 16.50 16.55 16.60 16.65 16.70 16.75 16.80 16.85 16.90 16.95 17.00 17.05 17.10 17.15 17.20 17.25 17.30 17.35 17.40 17.45 17.50 17.55 17.60 17.65 17.70 17.75 17.80 17.85 17.90 17.95 18.00 18.05 18.10 18.15 18.20 18.25 18.30 18.35 18.40 18.45 18.50 18.55 18.60 18.65 18.70 18.75 18.80 18.85 18.90 18.95 19.00 19.05 19.10 19.15 19.20 19.25 19.30 19.35 19.40 19.45 19.50 19.55 19.60 19.65 19.70 19.75 19.80 19.85 19.90 19.95 20.00 20.05 20.10 20.15 20.20 20.25 20.30 20.35 20.40 20.45 20.50 20.55 20.60 20.65 20.70 20.75 20.80 20.85 20.90 20.95 21.00 21.05 21.10 21.15 21.20 21.25 21.30 21.35 21.40 21.45 21.50 21.55 21.60 21.65 21.70 21.75 21.80 21.85 21.90 21.95 22.00 22.05 22.10 22.15 22.20 22.25 22.30 22.35 22.40 22.45 22.50 22.55 22.60 22.65 22.70 22.75 22.80 22.85 22.90 22.95 23.00 23.05 23.10 23.15 23.20 23.25 23.30 23.35 23.40 23.45 23.50 23.55 23.60 23.65 23.70 23.75 23.80 23.85 23.90 23.95 24.00 24.05 24.10 24.15 24.20 24.25 24.30 24.35 24.40 24.45 24.50 24.55 24.60 24.65 24.70 24.75 24.80 24.85 24.90 24.95 25.00 25.05 25.10 25.15 25.20 25.25 25.30 25.35 25.40 25.45 25.50 25.55 25.60 25.65 25.70 25.75 25.80 25.85 25.90 25.95 26.00 26.05 26.10 26.15 26.20 26.25 26.30 26.35 26.40 26.45 26.50 26.55 26.60 26.65 26.70 26.75 26.80 26.85 26.90 26.95 27.00 27.05 27.10 27.15 27.20 27.25 27.30 27.35 27.40 27.45 27.50 27.55 27.60 27.65 27.70 27.75 27.80 27.85 27.90 27.95 28.00 28.05 28.10 28.15 28.20 28.25 28.30 28.35 28.40 28.45 28.50 28.55 28.60 28.65 28.70 28.75 28.80 28.85 28.90 28.95 29.00 29.05 29.10 29.15 29.20 29.25 29.30 29.35 29.40 29.45 29.50 29.55 29.60 29.65 29.70 29.75 29.80 29.85 29.90 29.95 30.00 30.05 30.10 30.15 30.20 30.25 30.30 30.35 30.40 30.45 30.50 30.55 30.60 30.65 30.70 30.75 30.80 30.85 30.90 30.95 31.00 31.05 31.10 31.15 31.20 31.25 31.30 31.35 31.40 31.45 31.50 31.55 31.60 31.65 31.70 31.75 31.80 31.85 31.90 31.95 32.00 32.05 32.10 32.15 32.20 32.25 32.30 32.35 32.40 32.45 32.50 32.55 32.60 32.65 32.70 32.75 32.80 32.85 32.90 32.95 33.00 33.05 33.10 33.15 33.20 33.25 33.30 33.35 33.40 33

# HP-1 for entry 7-12:

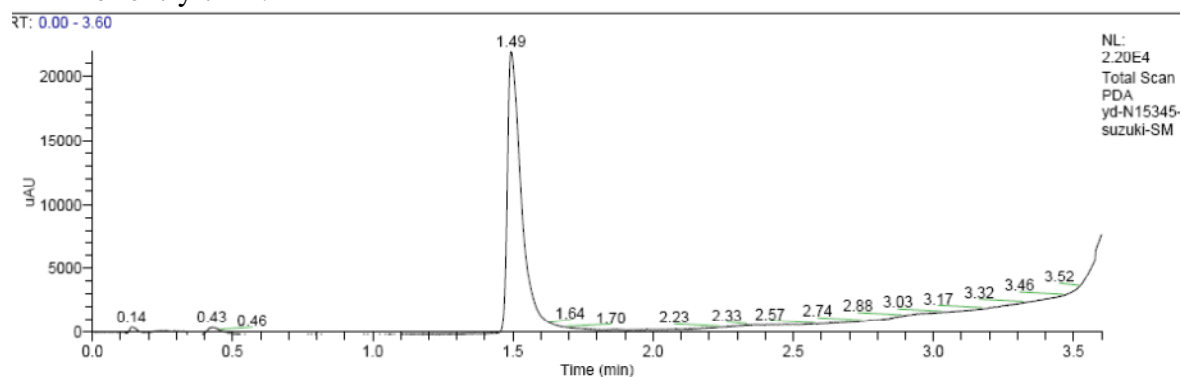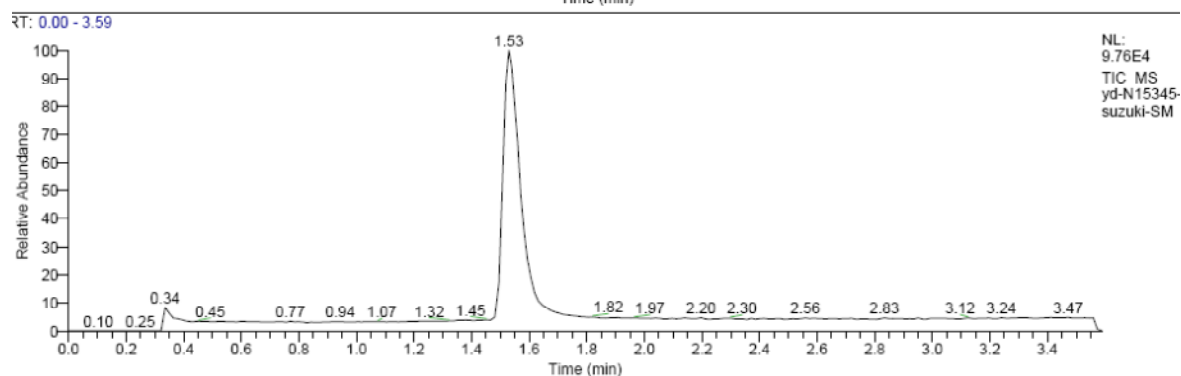

d-N15345-suzuki-SM #103-121 RT: 1.48-1.70 AV: 19 NL: 9.18E3  
f: ITMS - c ESI Full ms [600.00-2000.00]

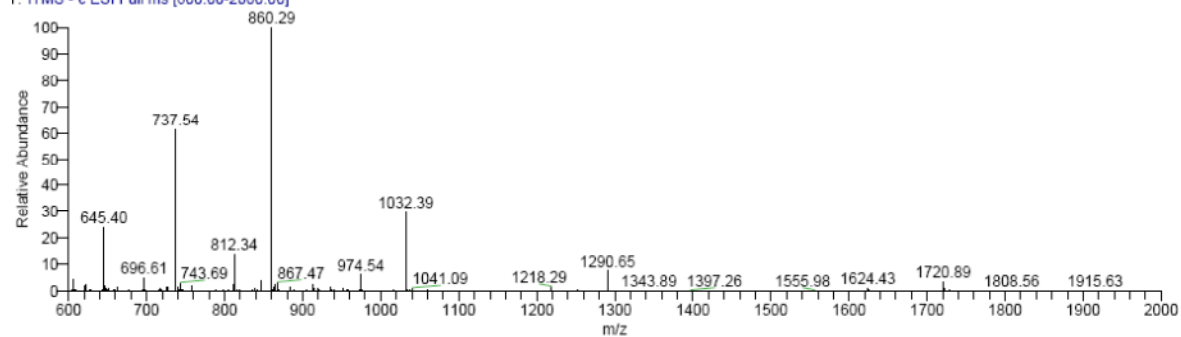

d-N15345-suzuki-SM #103-121 RT: 1.48-1.70 AV: 19 NL: 9.18E3  
f: ITMS - c ESI Full ms [600.00-2000.00]

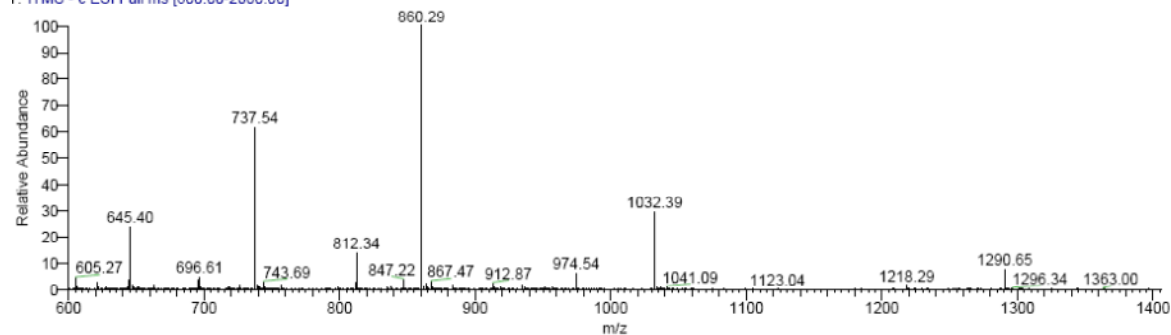

Table 2, entry 7:  
yd-N15345-23-80C3h20m-A2

RT: 0.00 - 3.60

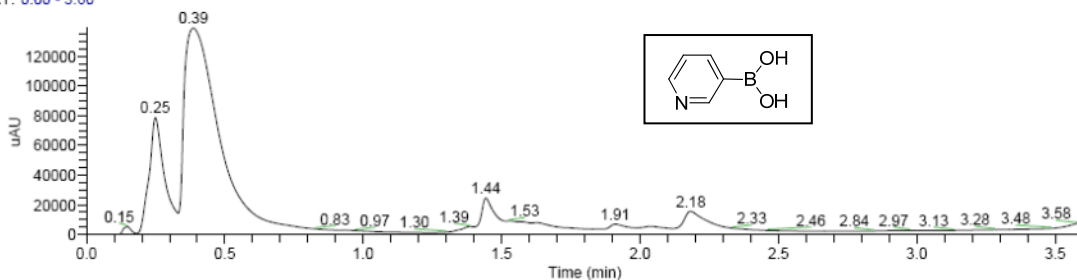

NL:  
1.39E5  
Total Scan  
PDA  
yd-N15345-  
23-  
80C3h20m-  
A2

RT: 0.00 - 3.59

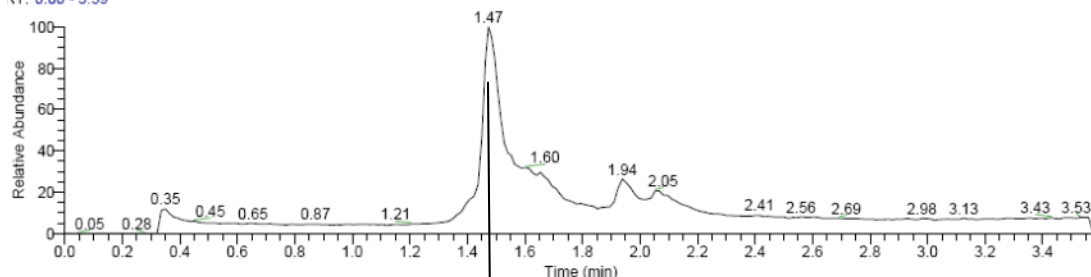

NL:  
6.25E4  
TIC MS  
yd-N15345-  
23-  
80C3h20m-  
A2

yd-N15345-23-80C3h20m-A2 #101-108 RT: 1.45-1.53 AV: 8 NL: 9.4ME3  
T: ITMS - c ESI Full ms [600.00-2000.00]

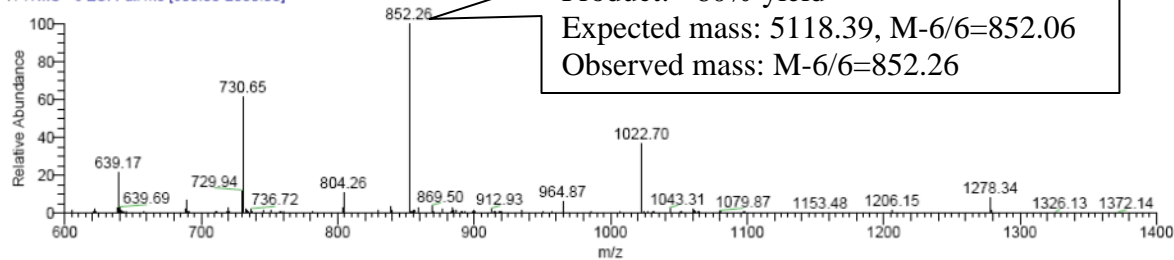

Product: ~60% yield  
Expected mass: 5118.39,  $M-6/6=852.06$   
Observed mass:  $M-6/6=852.26$

yd-N15345-23-80C3h20m-A2 #112-124 RT: 1.58-1.74 AV: 13 NL: 3.93E2  
T: ITMS - c ESI Full ms [600.00-2000.00]

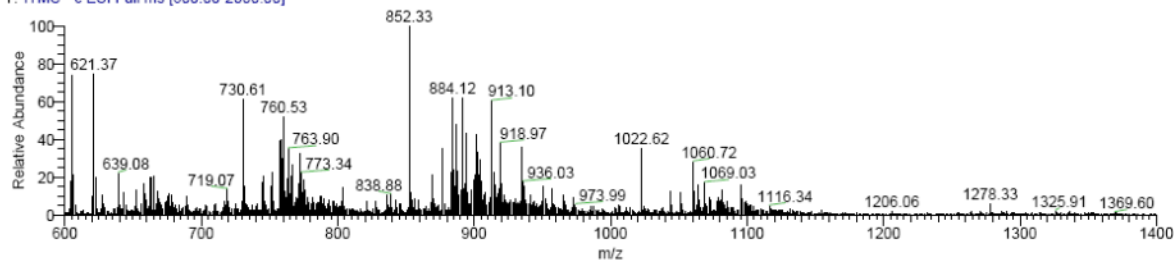

yd-N15345-23-80C3h20m-A2 #136-151 RT: 1.91-2.13 AV: 16 NL: 8.25E2  
T: ITMS - c ESI Full ms [600.00-2000.00]

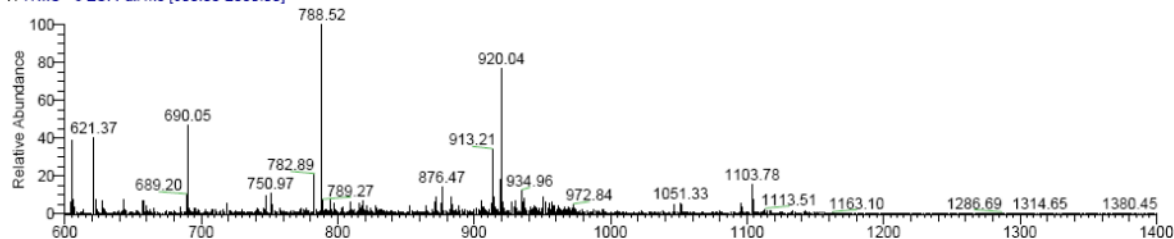

Table 2, entry 7, LCMS @ 16 hrs:

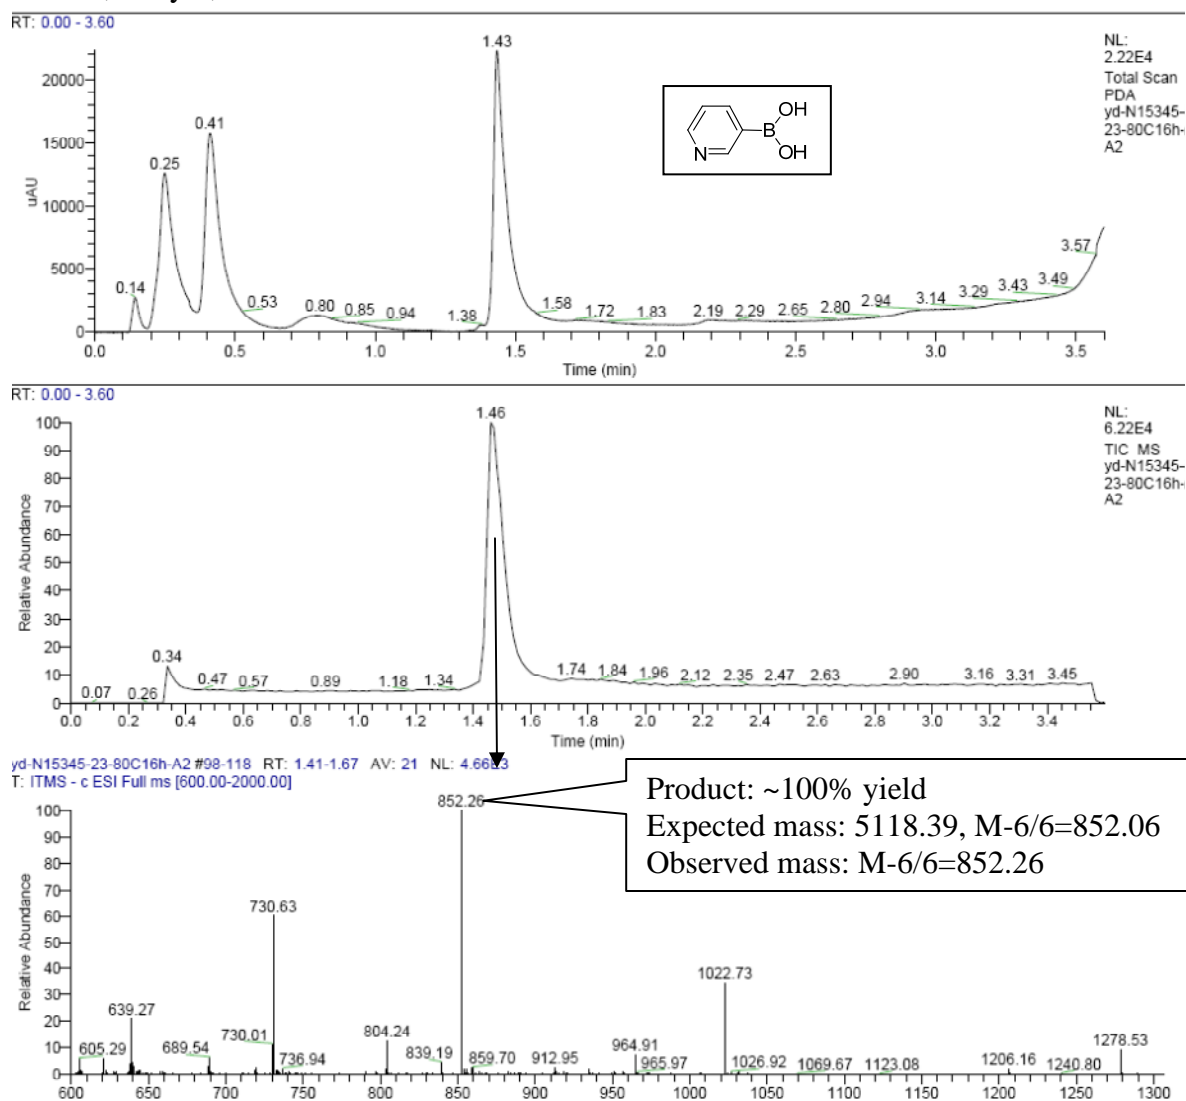

Table 2, entry 8:

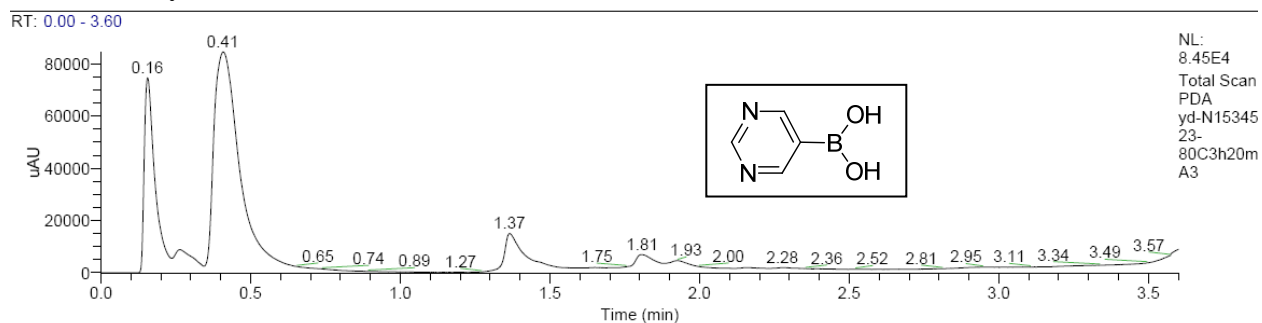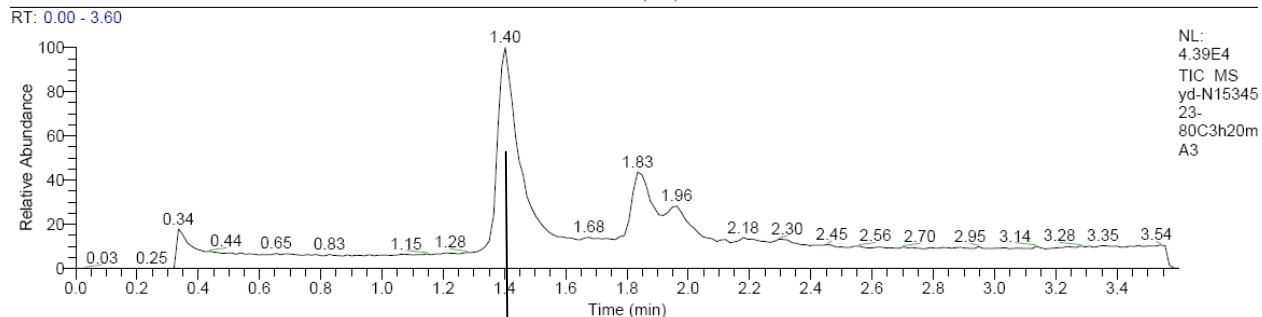

yd-N15345-23-80C3h20m-A3 #94-112 RT: 1.35-1.59 AV: 19 NL: 2.72E3  
T: ITMS - c ESI Full ms [600.00-2000.00]

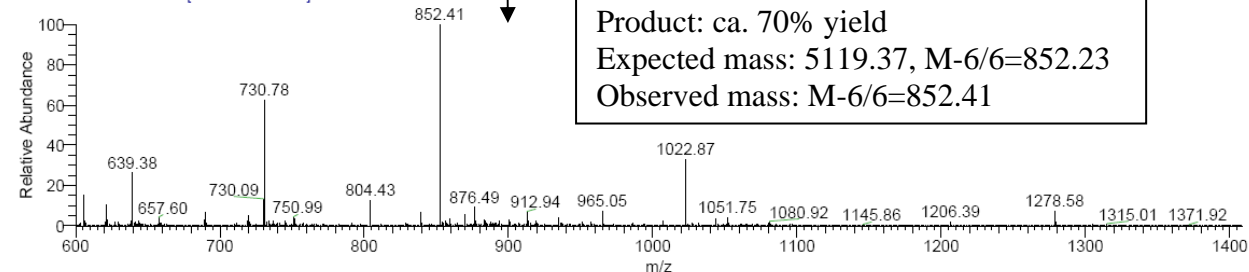

yd-N15345-23-80C3h20m-A3 #127-133 RT: 1.81-1.89 AV: 7 NL: 1.52E3  
T: ITMS - c ESI Full ms [600.00-2000.00]

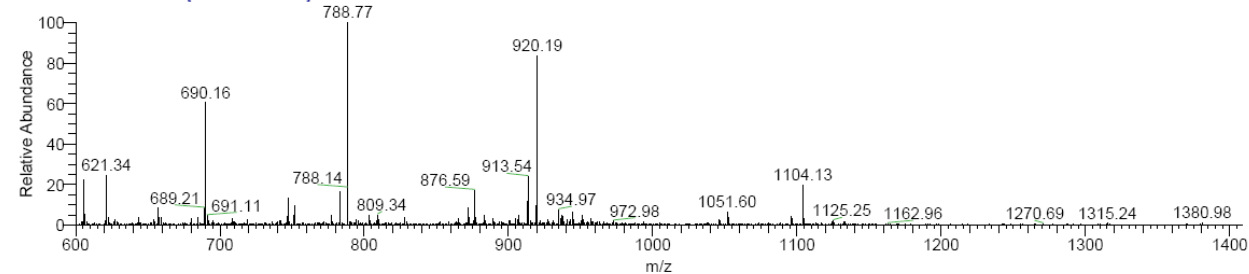

yd-N15345-23-80C3h20m-A3 #136-143 RT: 1.93-2.03 AV: 8 NL: 6.04E2  
T: ITMS - c ESI Full ms [600.00-2000.00]

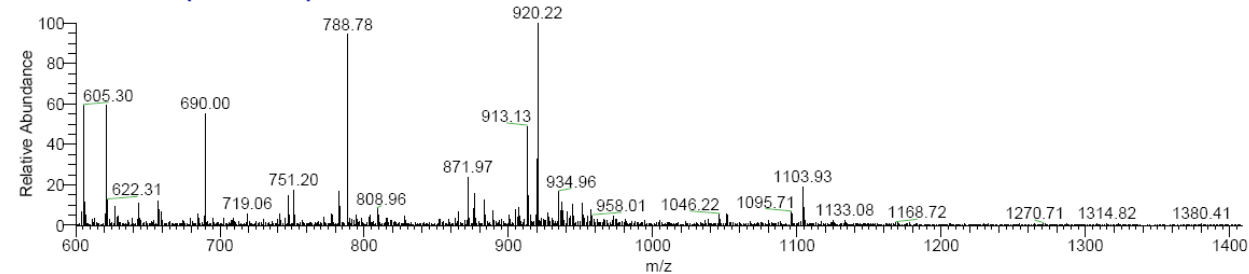



Table 2, entry 8, LCM @ 16 hrs:

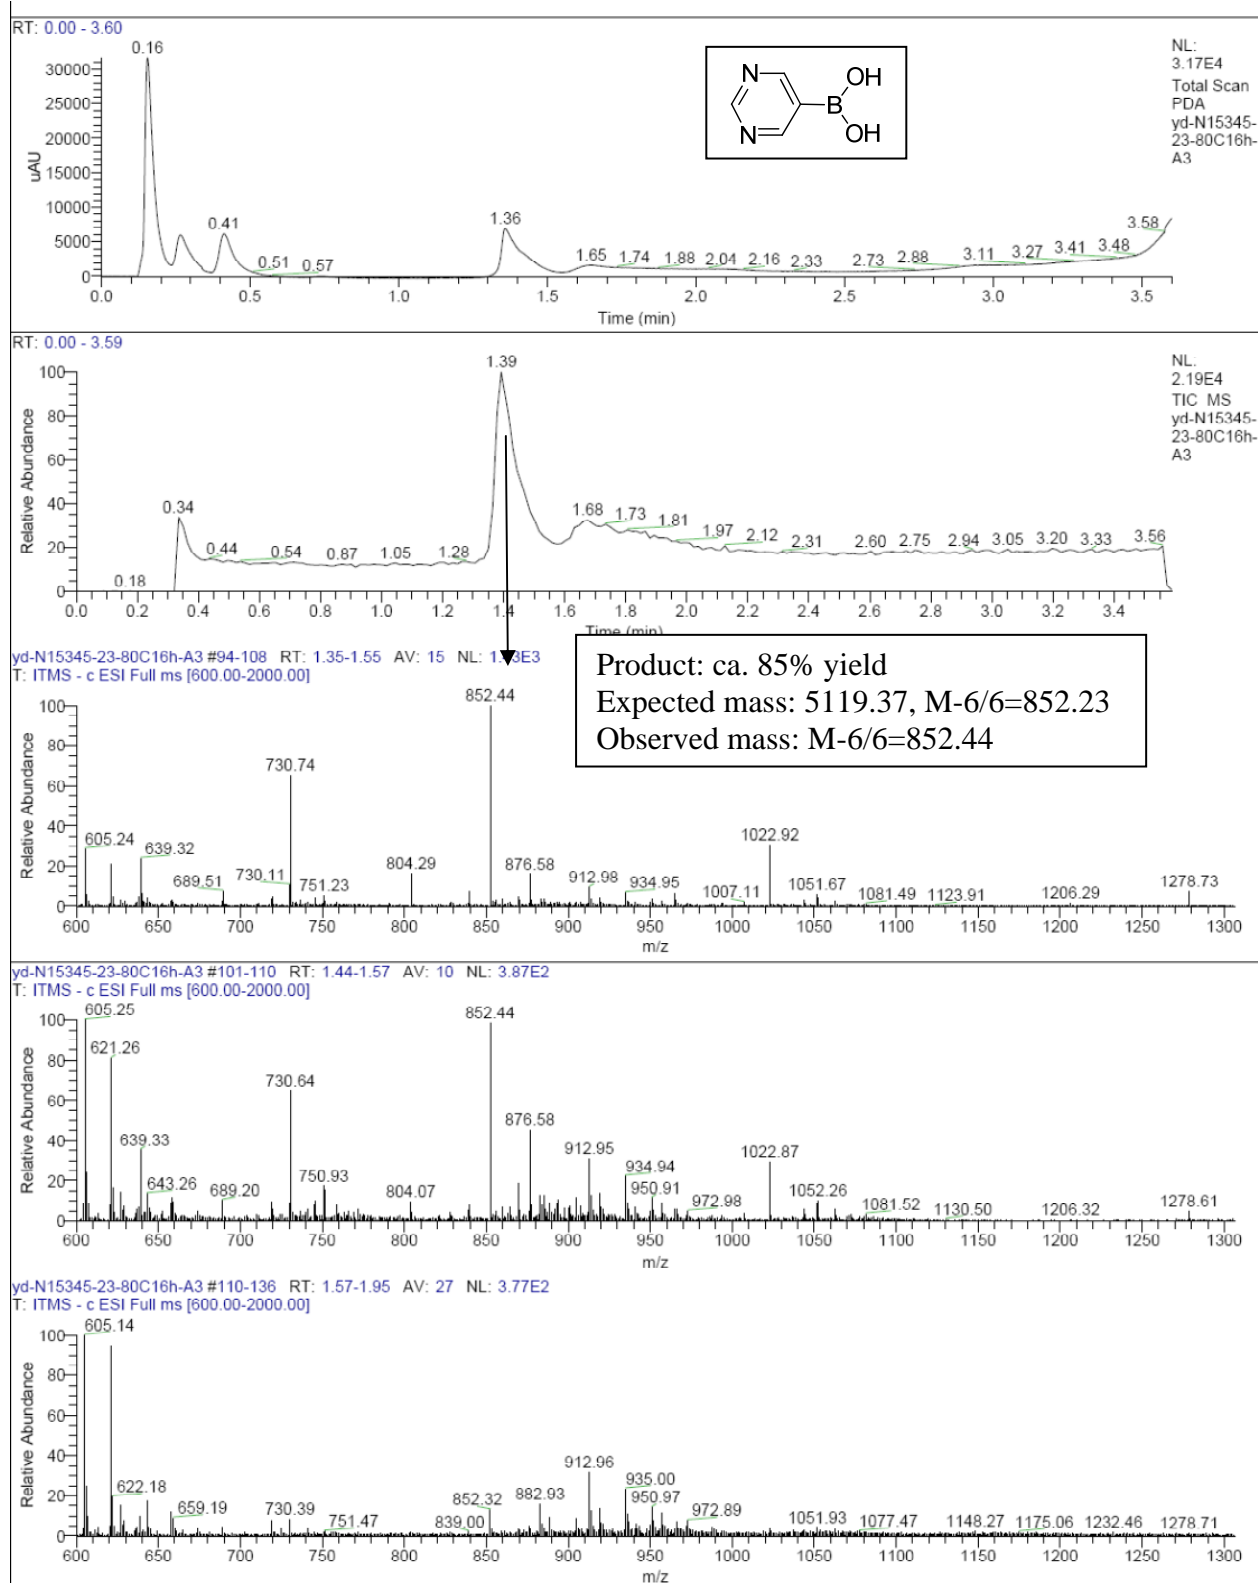

Table 2, entry 9:

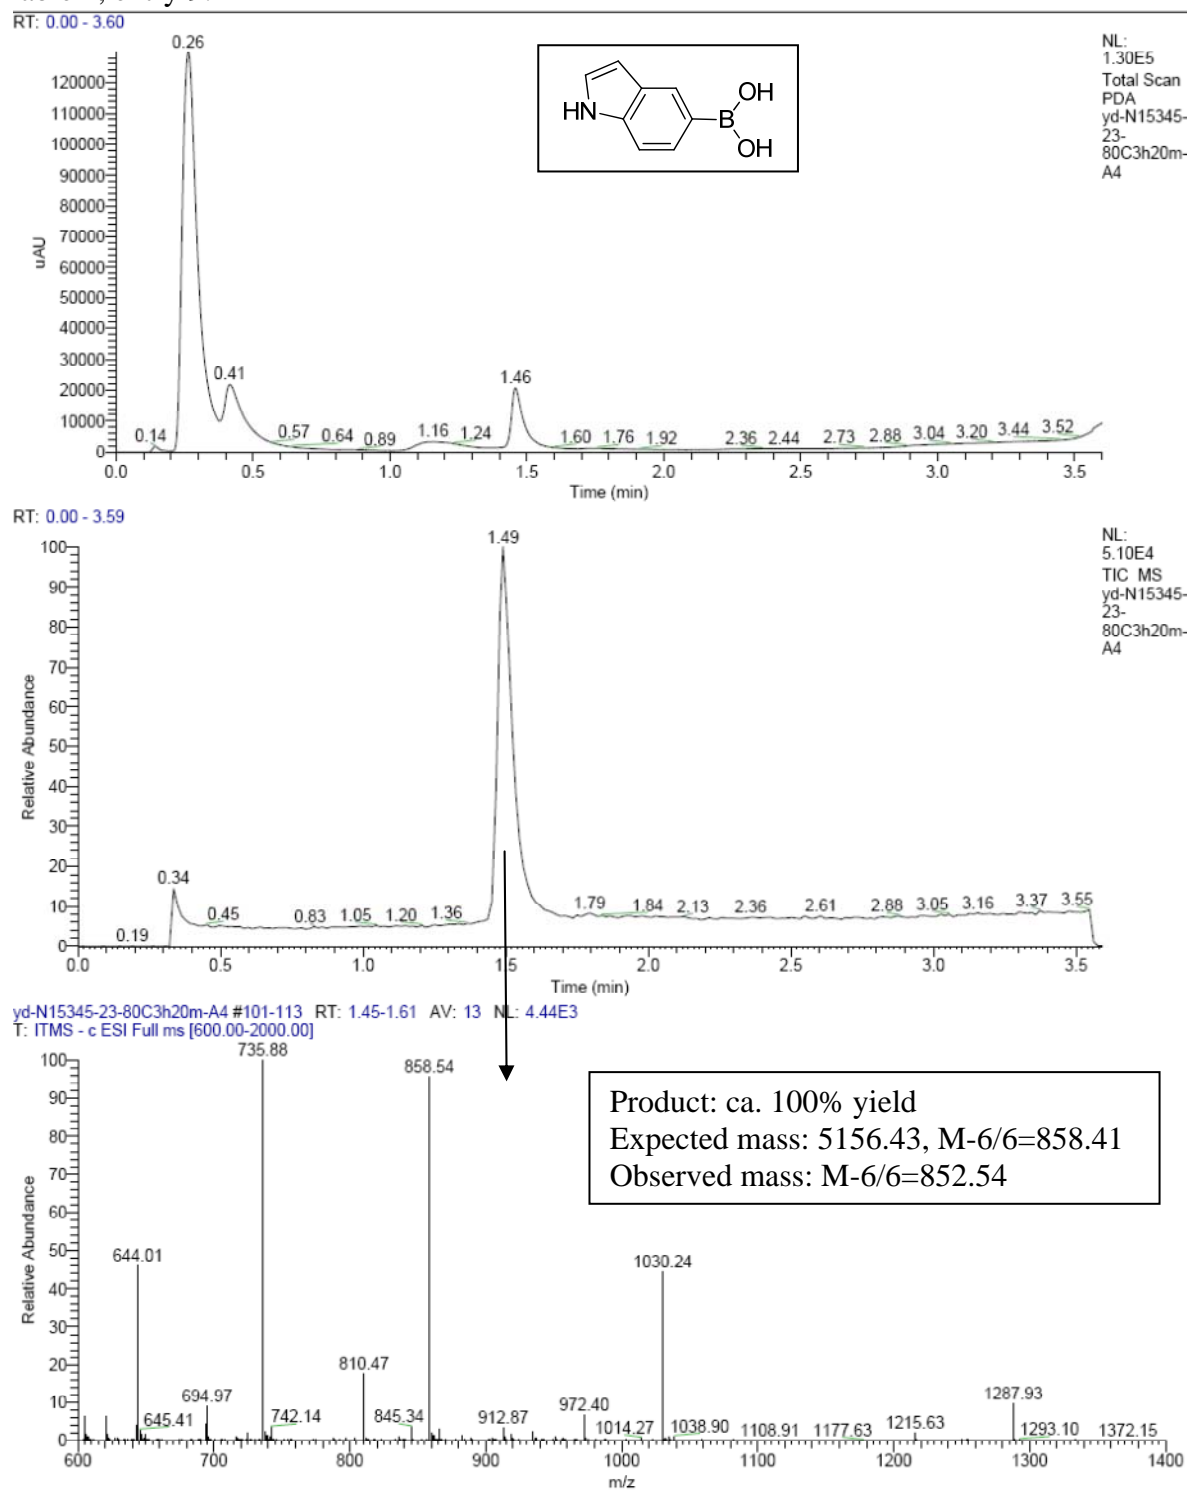

Table 2, entry 10:

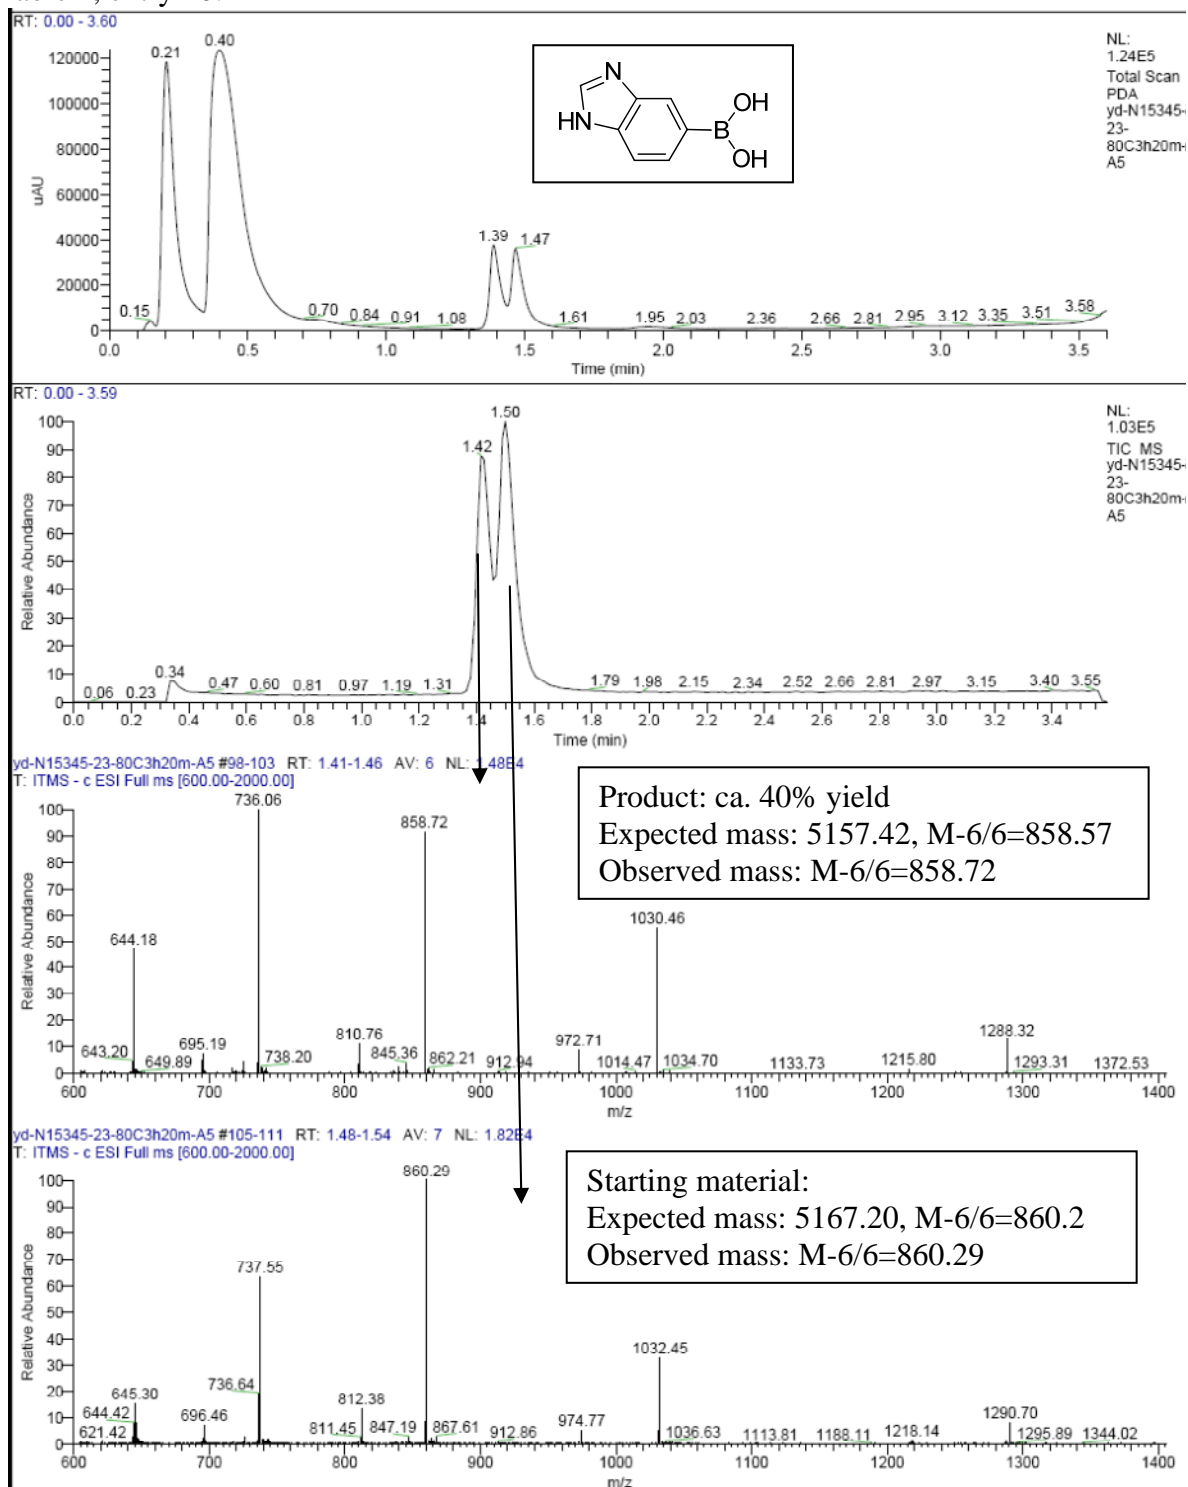

Table 2, entry 10, LCMS @ 16 hrs:

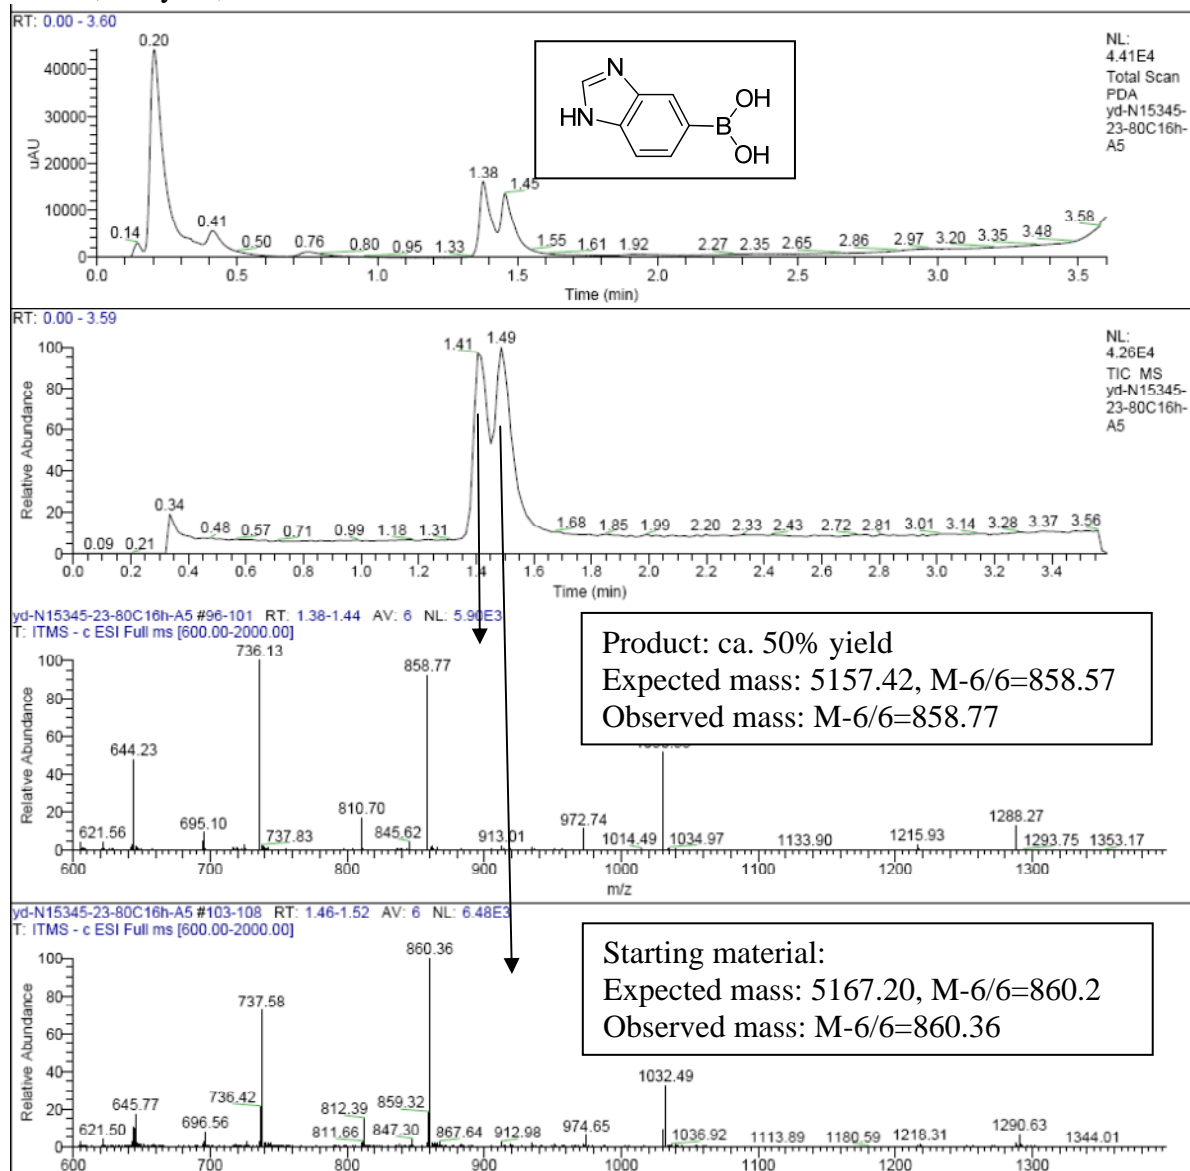

Table 2, entry 11:

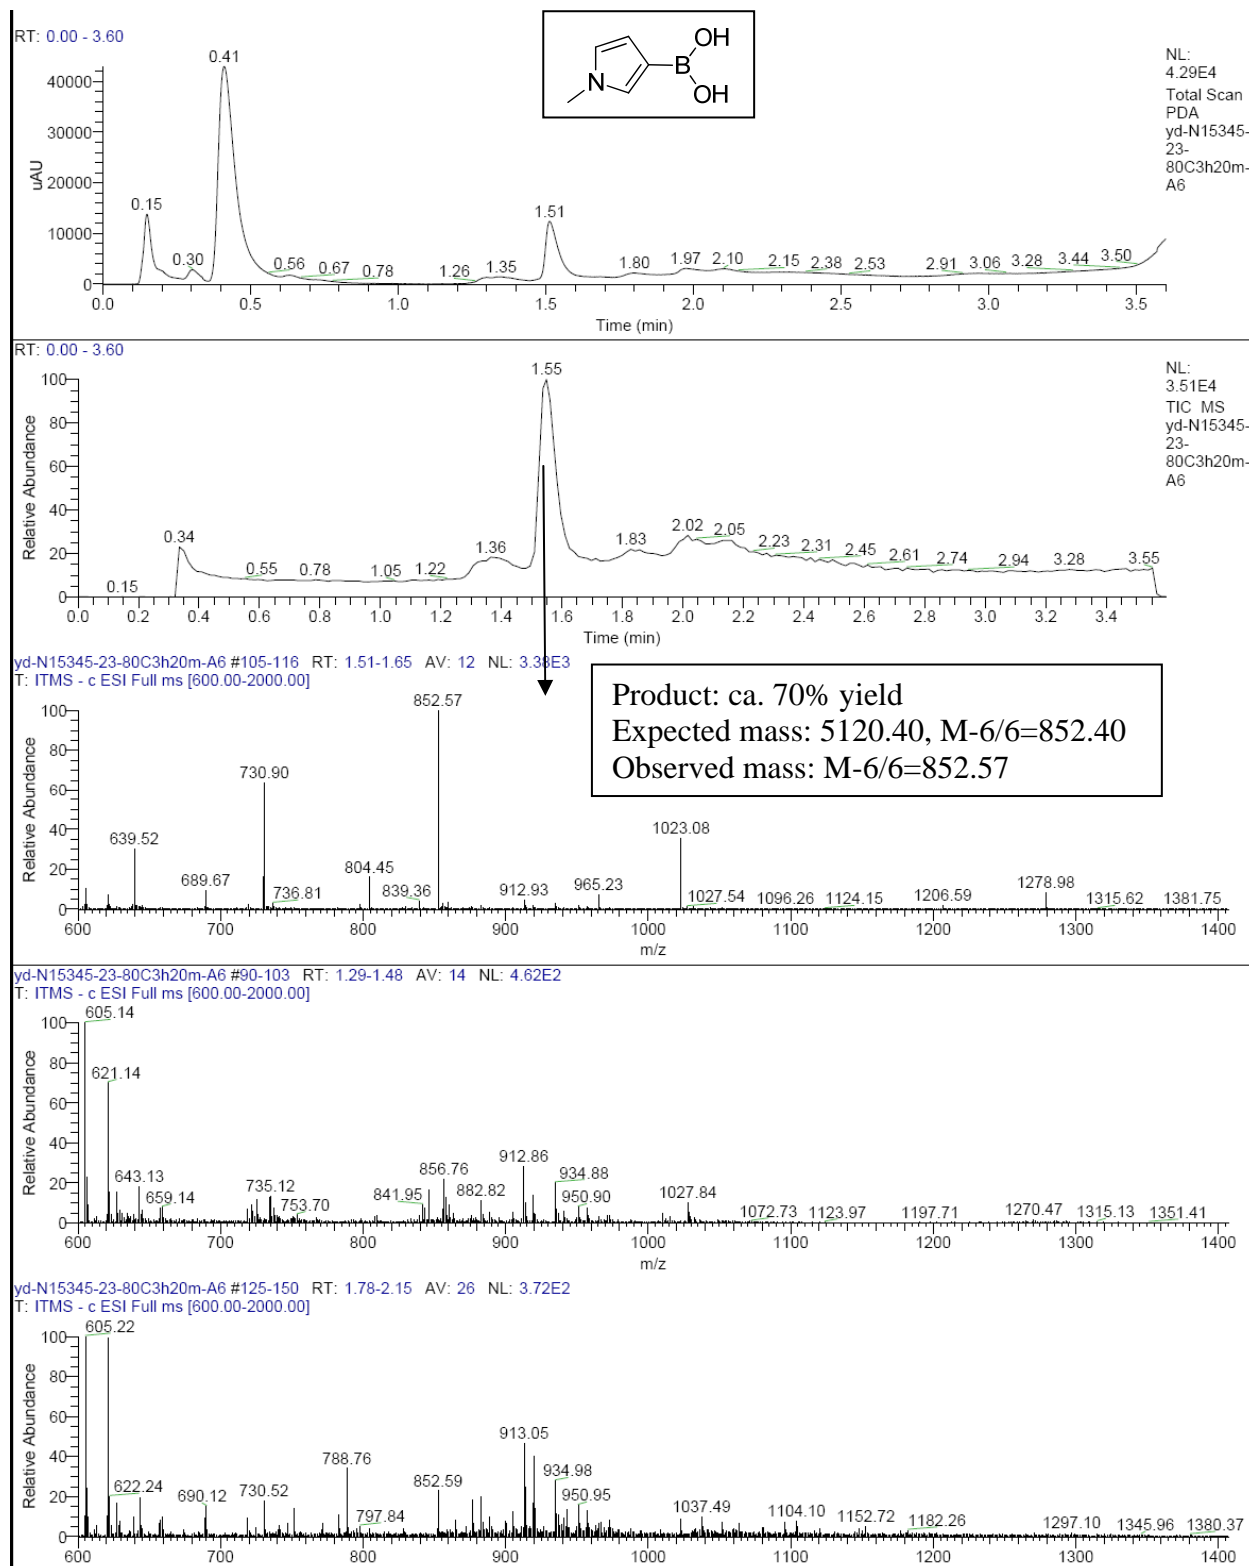

Table 2, entry 12:

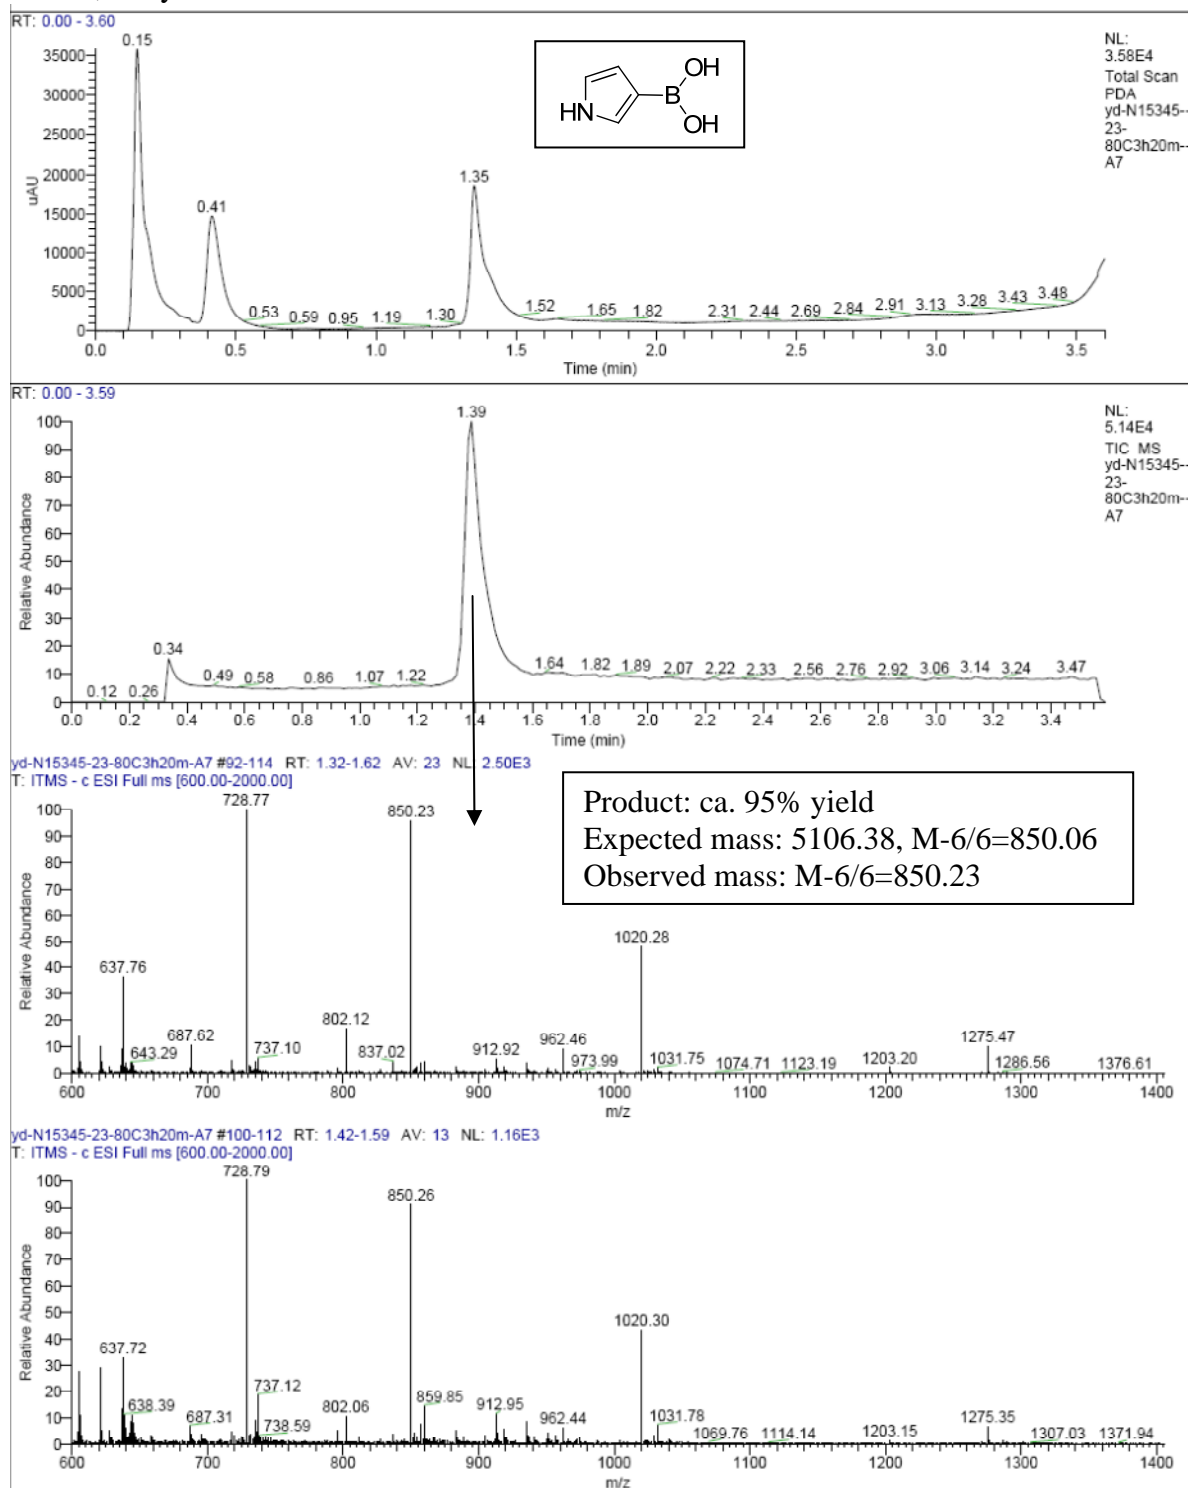

### Preparation of **HP-5**, **6** & **7**

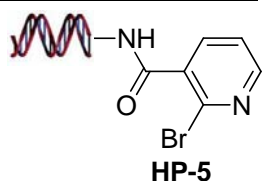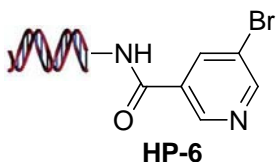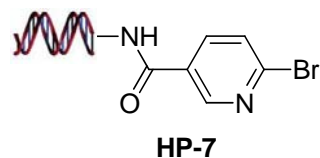

A solution of HP in pH9.4 borate buffer (250 mM) (1  $\mu$ mol, 300  $\mu$ L) was added at cold 40 equivalents of bromo-nicotinic acid (8.1 mg in 70  $\mu$ L of DMF), followed by 40 equivalents of DMT-MM (10.9 mg in 70  $\mu$ L of water). The pH of the reaction solution was adjusted to around 9 with NaOH. The reaction was allowed to proceed at cold overnight. 10% piperidine (44  $\mu$ L) was added to the reaction. After 15 minutes, the reaction was precipitated by adding 10% 5 N NaCl water solution and 2.5 times volume of absolute EtOH. The pellet was redissolved in water (400  $\mu$ L), and purified with reverse-phase HPLC (10-40% solvent B).

### General procedure for the coupling of **HP-5**, **6** & **7** with boronic acids in Table 3.

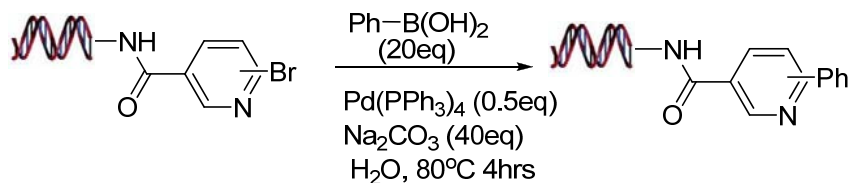

A 1 mM solution of **HP-5**, **-6**, or **-7** in water (20 nmol, 20  $\mu$ L) was added 20 equivalents of boronate (0.5  $\mu$ L, 800 mM in DMA) and 40 equivalents of Na<sub>2</sub>CO<sub>3</sub> (0.5  $\mu$ L, 1.6 M in water), followed by 0.33 equivalent of degassed Pd(PPh<sub>3</sub>)<sub>4</sub> (2  $\mu$ L, 3.3 mM in CH<sub>3</sub>CN). The reaction was allowed to proceed at 80 °C for 5 h.



Table 3, entry 1A:

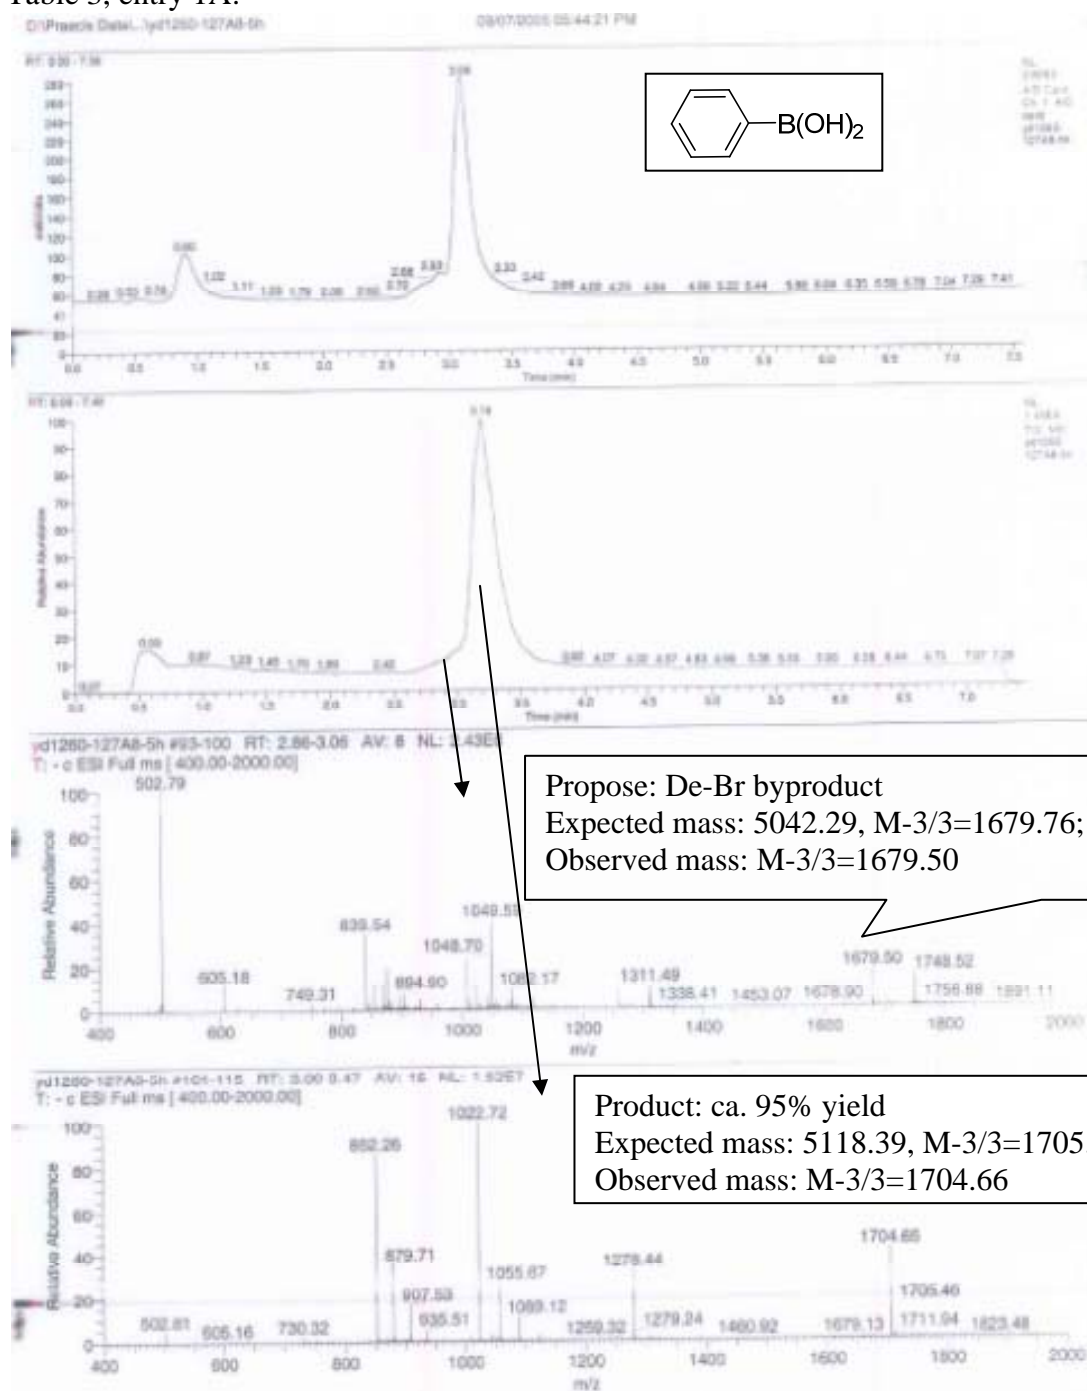

Table 3, entry 2A:

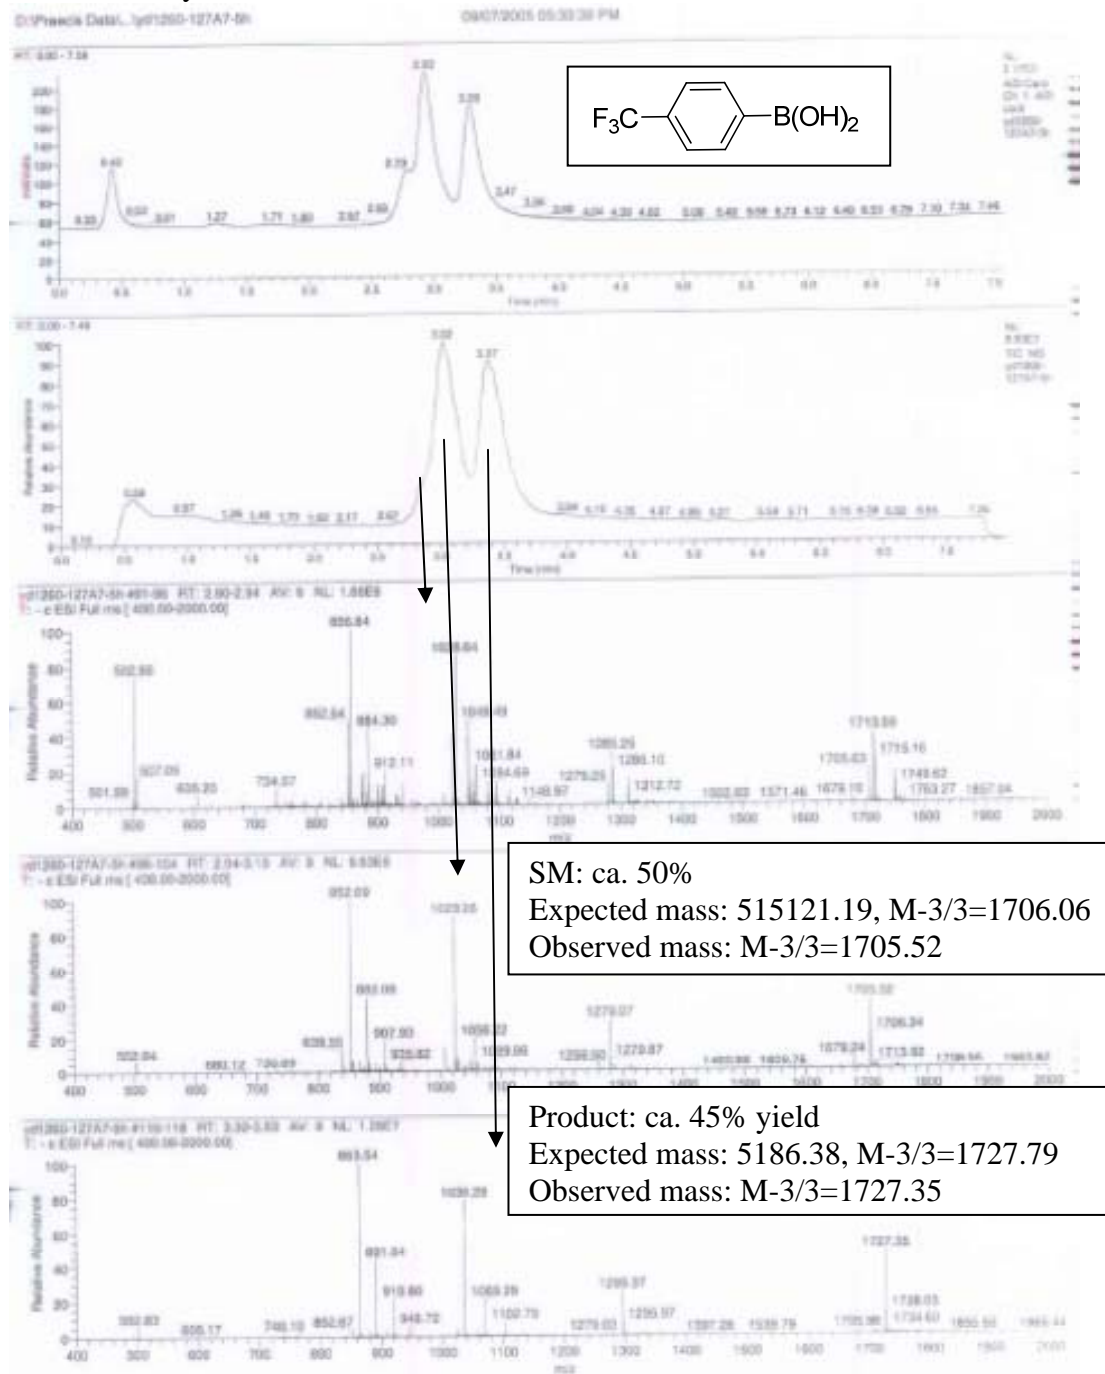

Table 3, entry 3A:

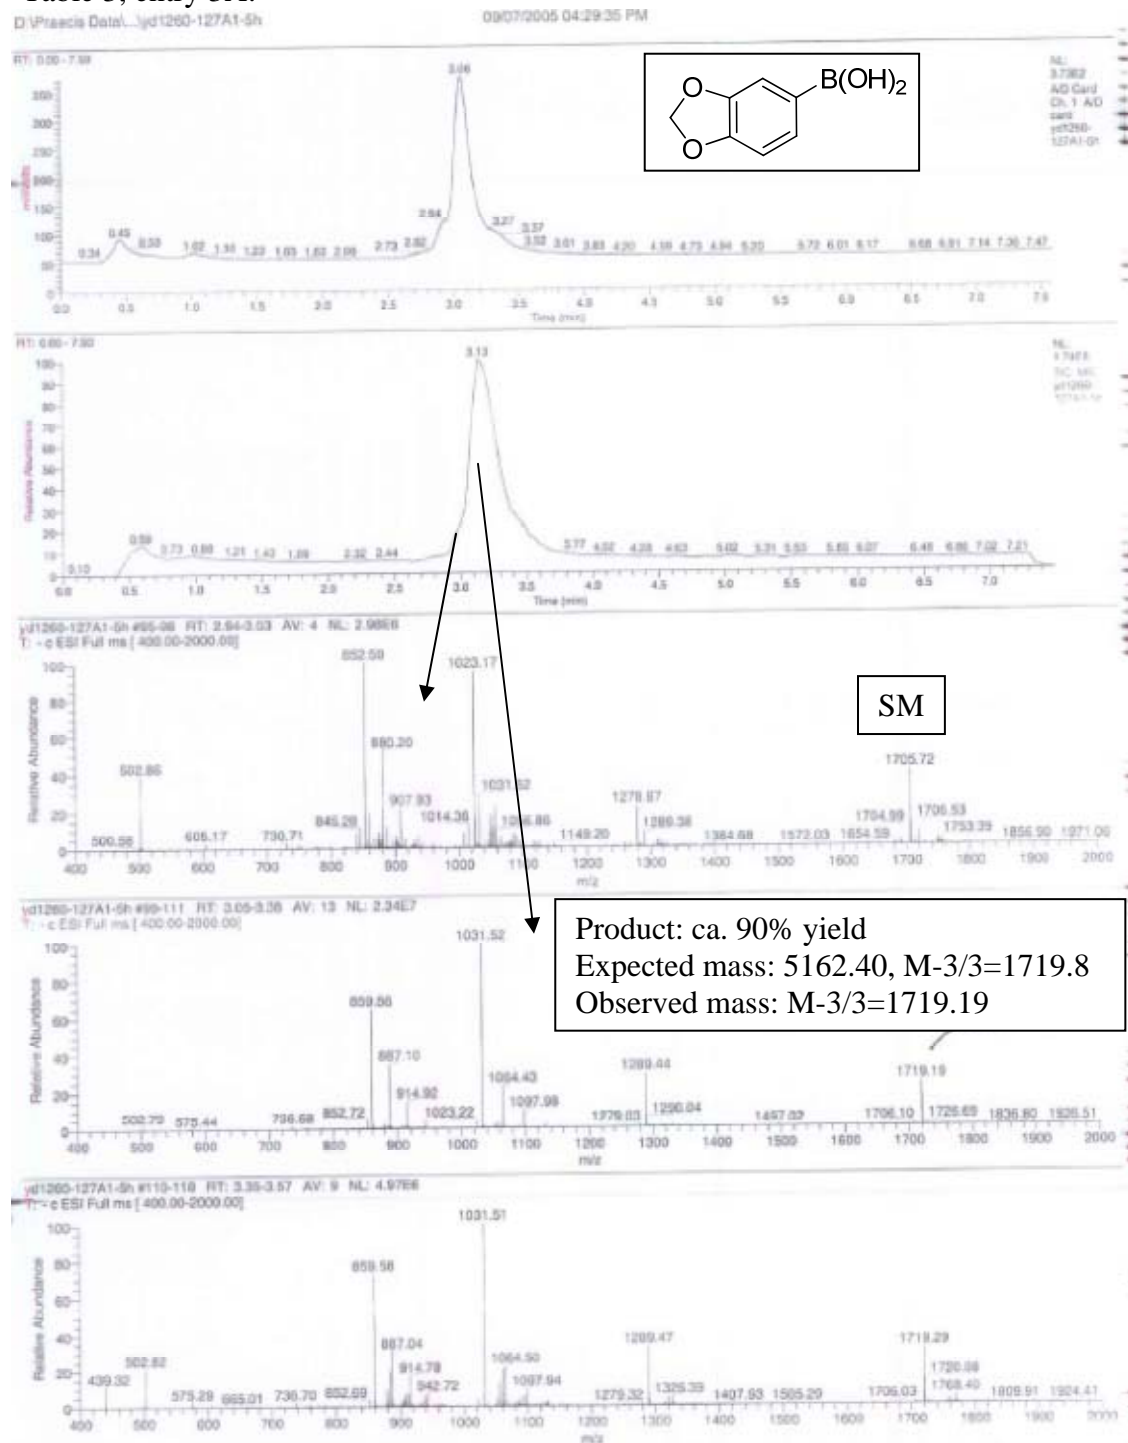

Table 3, entry 4A:

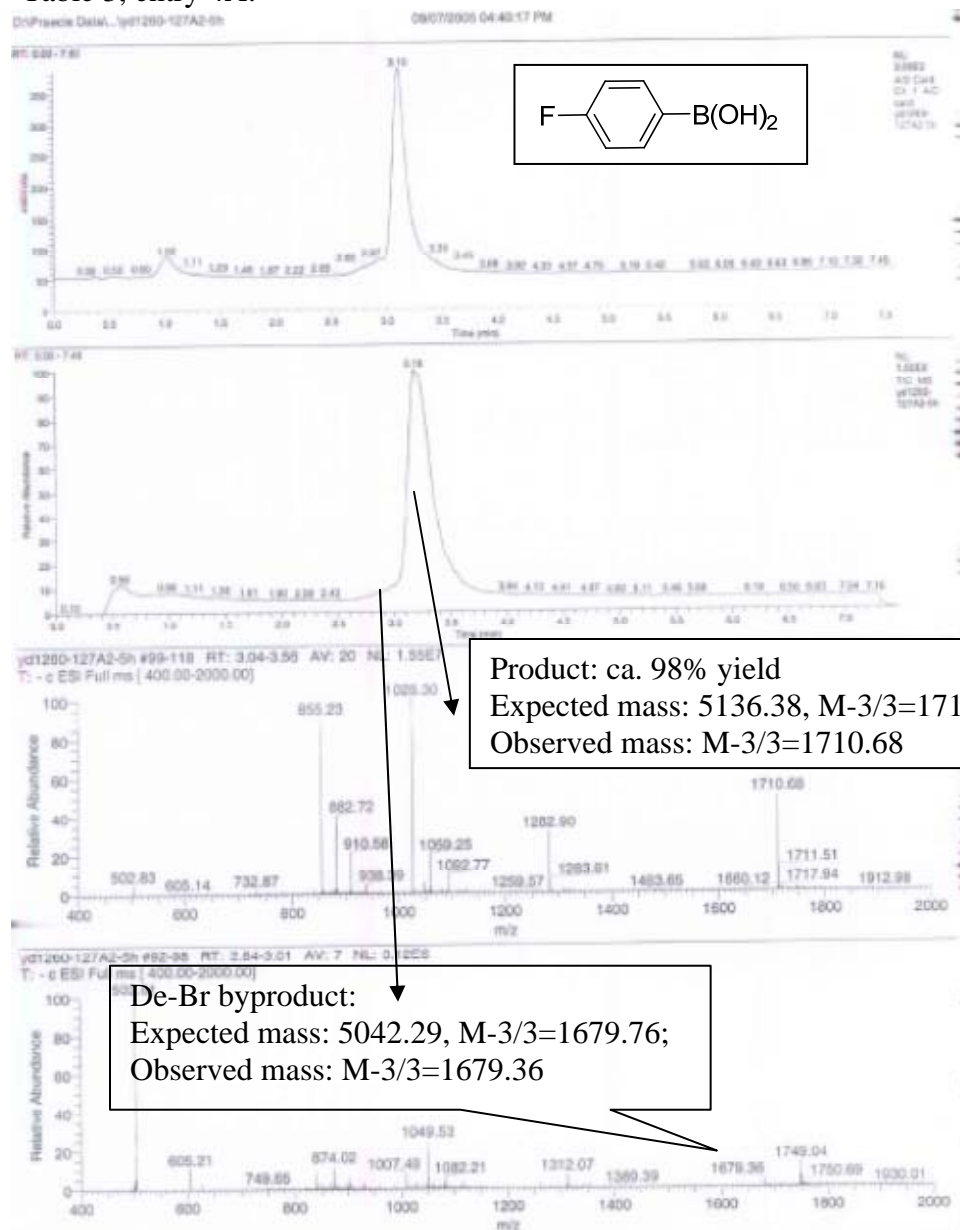

Table 3, entry 5A:

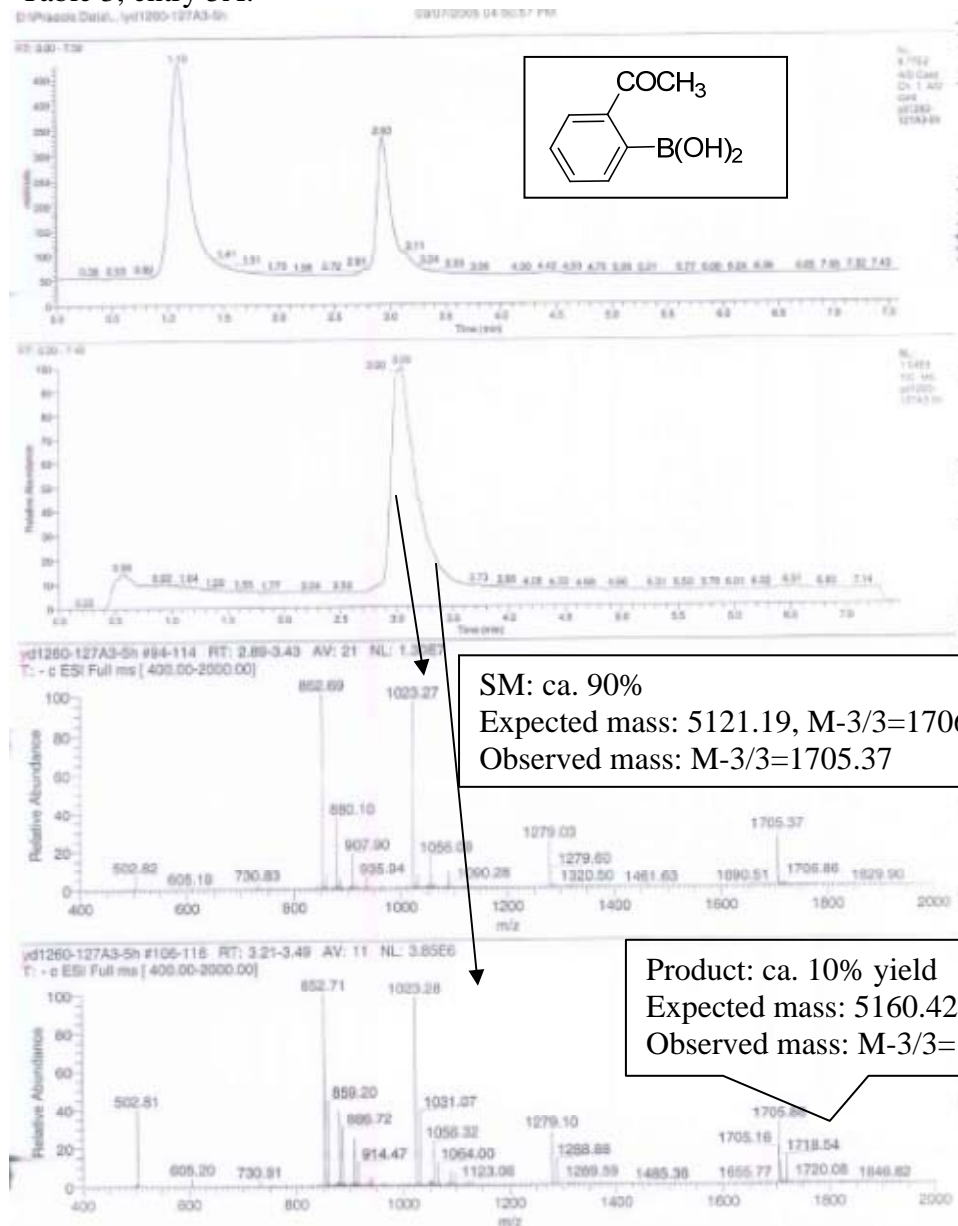

Table 3, entry 6A:

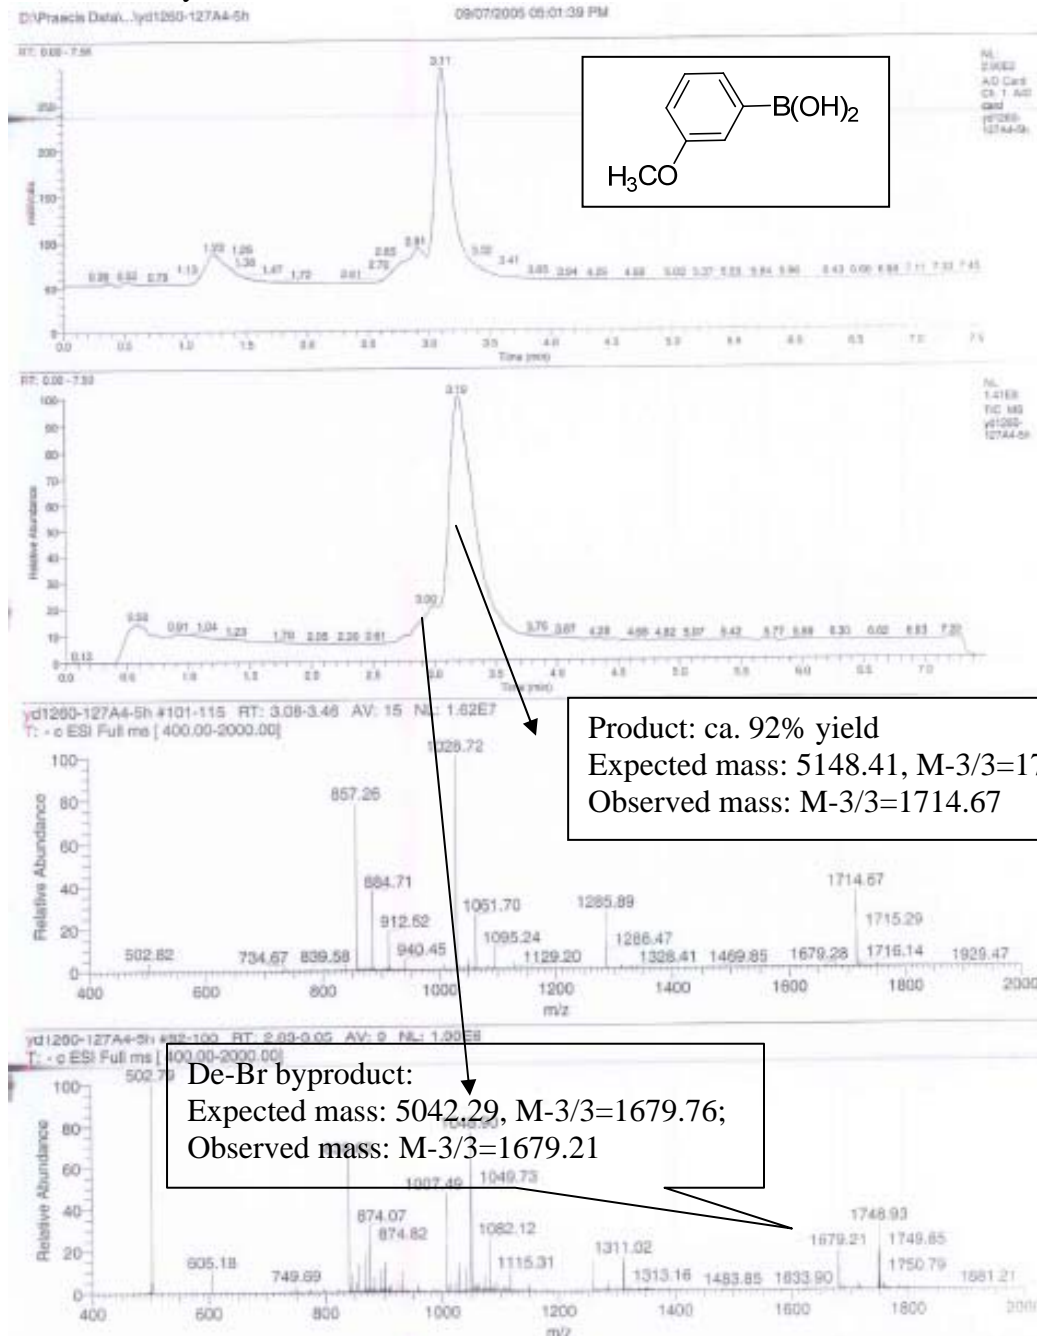

Table 3, entry 7A:

D:\V-Profiles Data\...y1210-121A6-5H

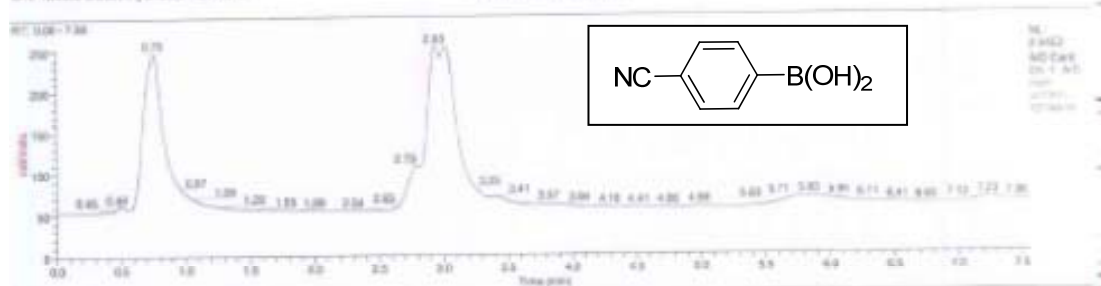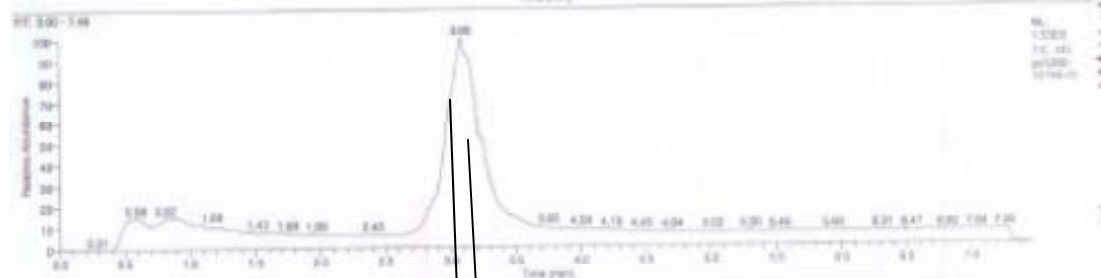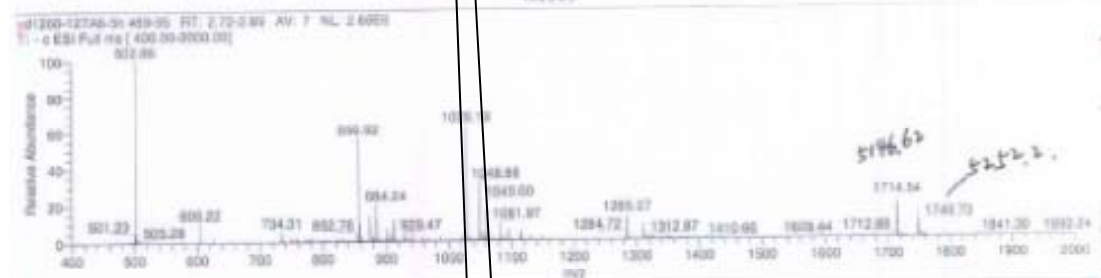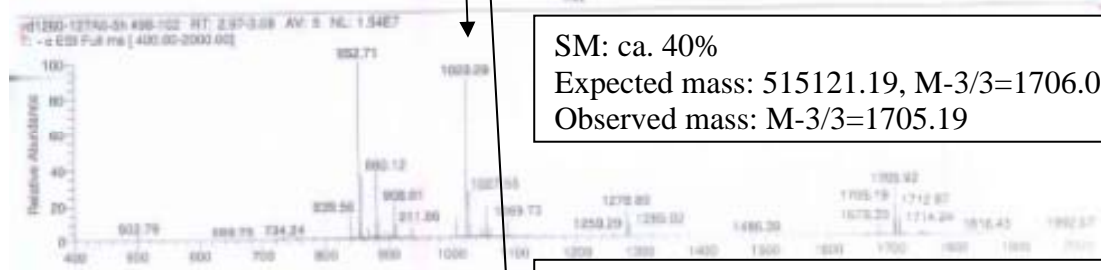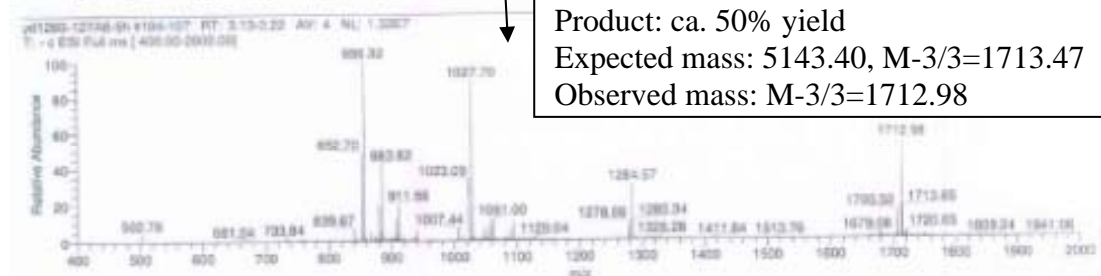

SM: ca. 40%  
Expected mass: 515121.19,  $M-3/3=1706.06$   
Observed mass:  $M-3/3=1705.19$

Product: ca. 50% yield  
Expected mass: 5143.40,  $M-3/3=1713.47$   
Observed mass:  $M-3/3=1712.98$



Table 3, entry 8A:

RT: 0.00 - 1.20

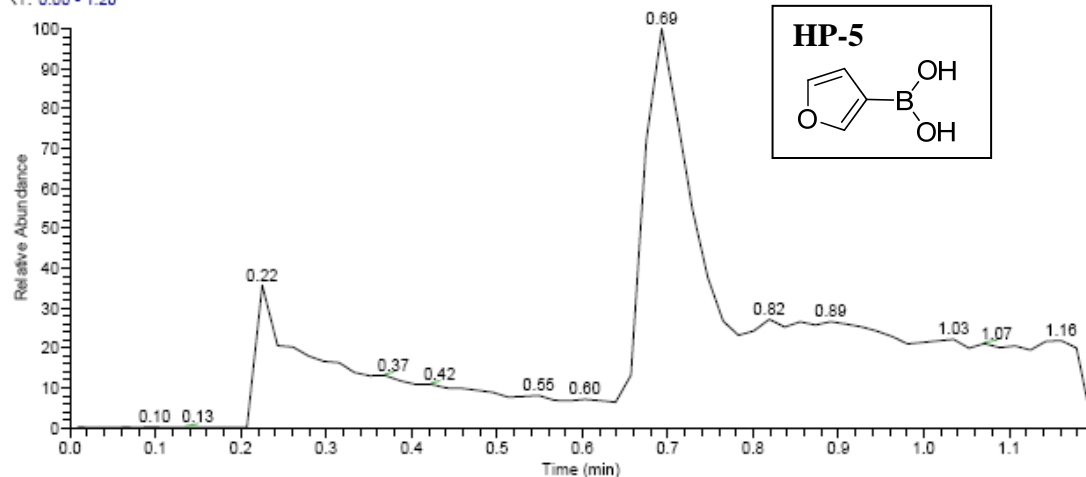

NL: 6.98E3  
TIC MS  
yd-suzuki-  
2stepreat-  
25

rd-suzuki-2stepreat-25 #36-54 RT: 0.64-0.96 AV: 19 NL: 2.24E2  
T: ITMS - c ESI Full ms [525.00-1950.00]

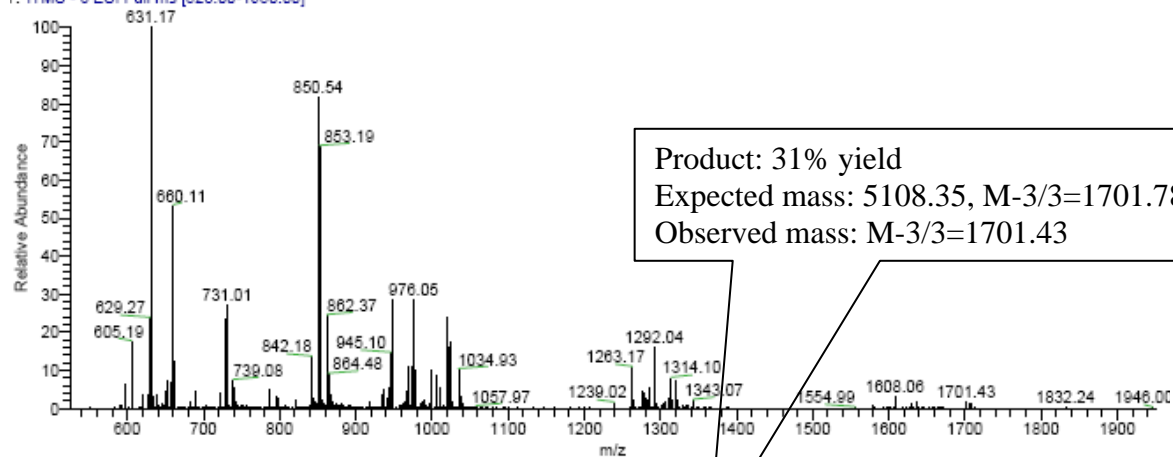

rd-suzuki-2stepreat-25 #36-48 RT: 0.64-0.85 AV: 13 NL: 6.21  
T: ITMS - c ESI Full ms [525.00-1950.00]

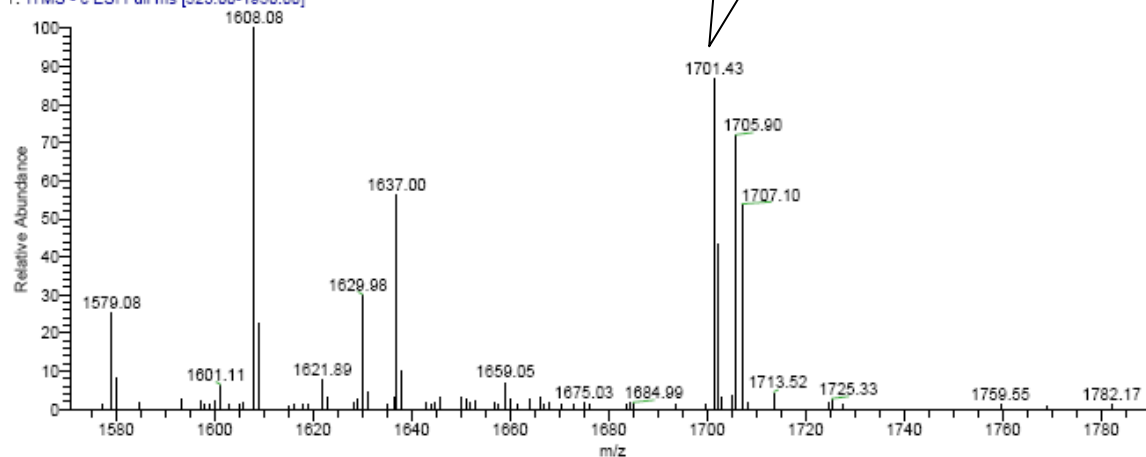

Table 3, entry 9A:

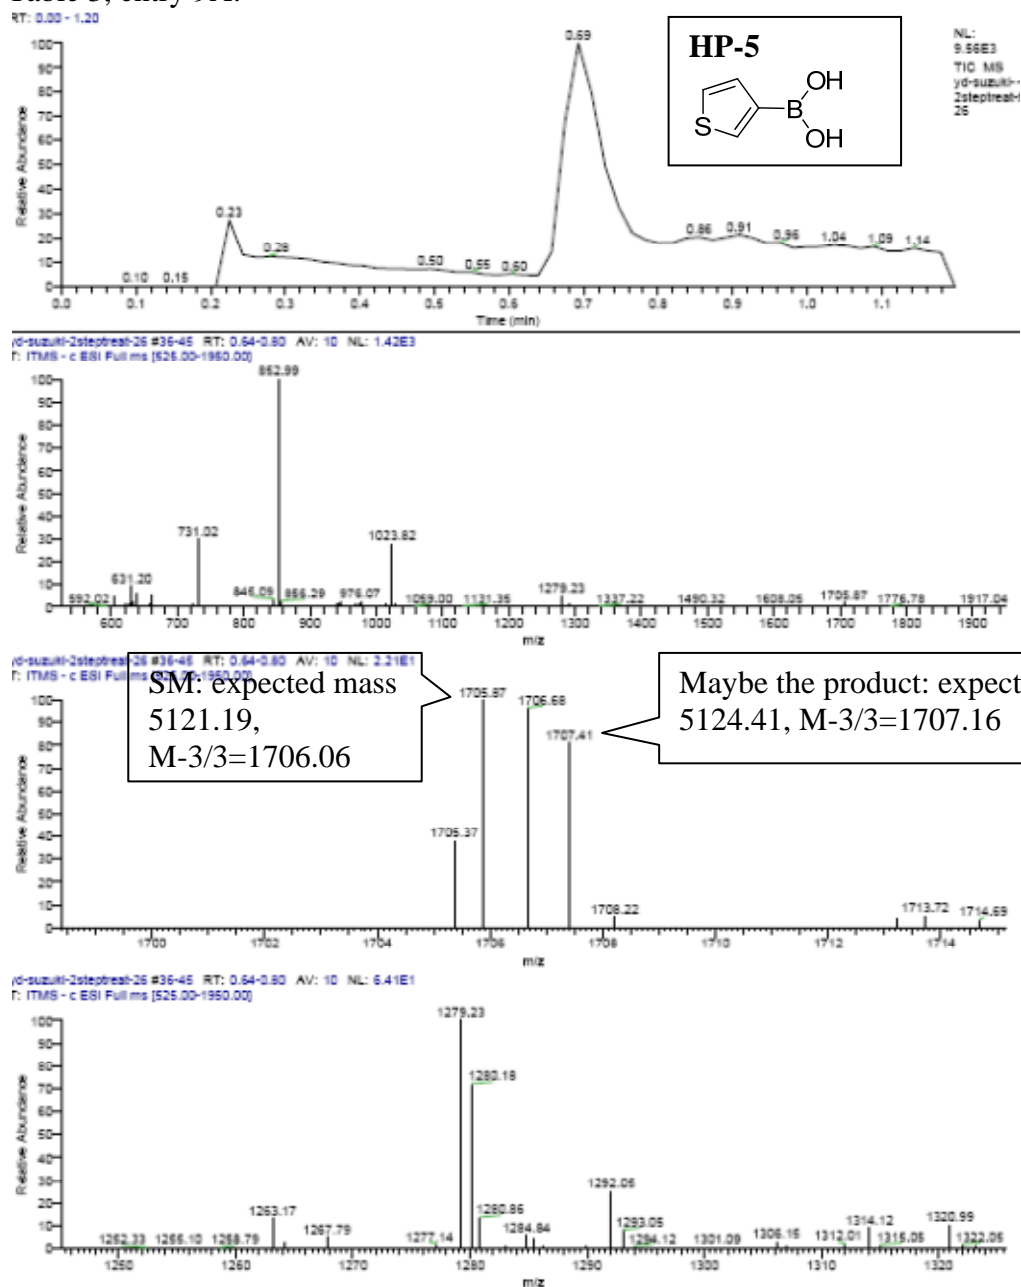

Table 3, entry 10A:

IT: 0.00 - 1.20

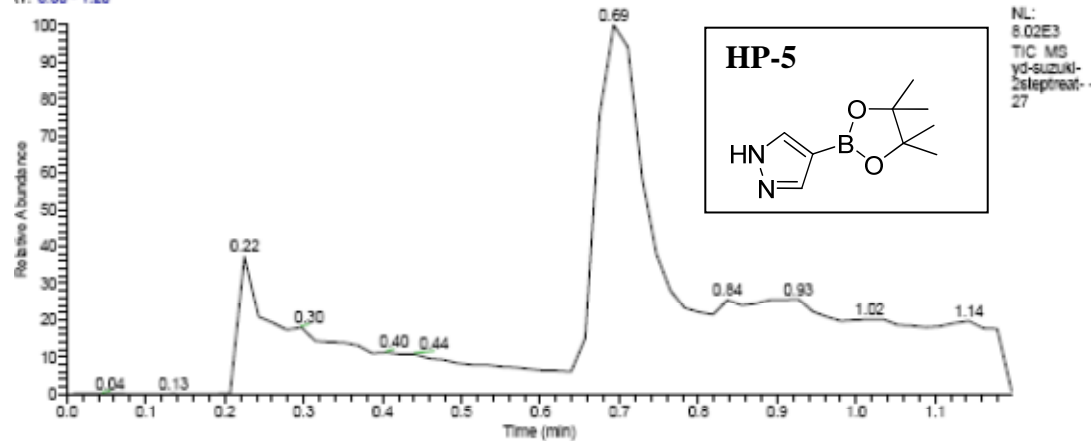

d-suzuki-2septreat-27 #36-52 RT: 0.64-0.93 AV: 17 NL: 7.42E2

ITMS - c ESI Full ms [525.00-1950.00]

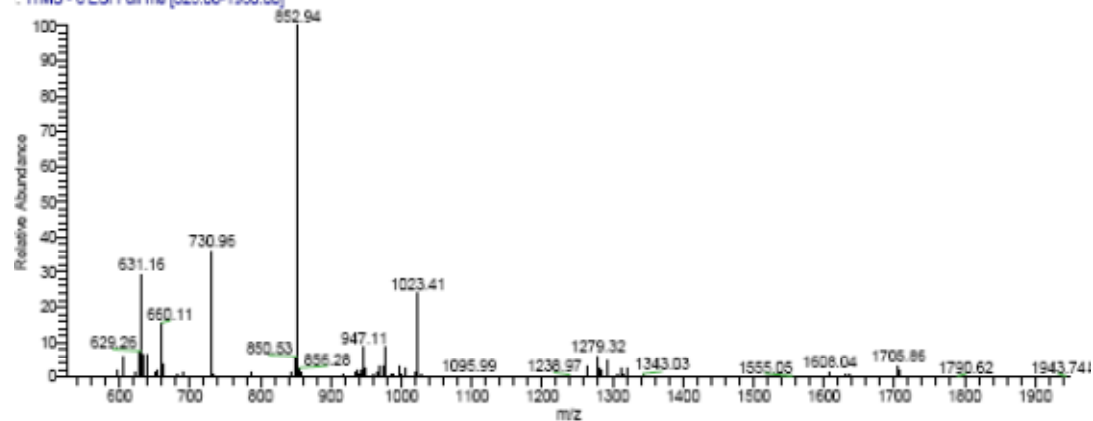

d-suzuki-2septreat-27 #36-54 RT: 0.64-0.96 AV: 19 NL: 2.05E1

ITMS - c ESI Full ms [525.00-1950.00]

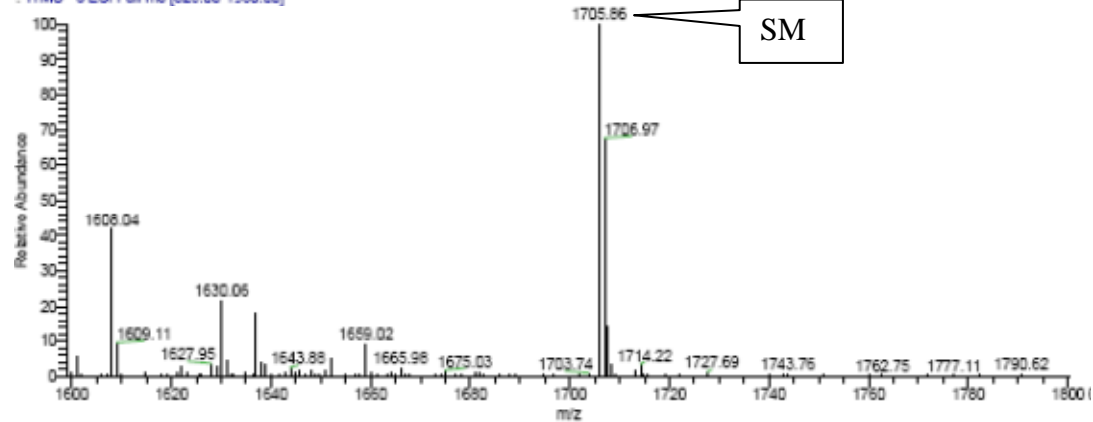

Table 3, entry 11A:

RT: 0.00 - 1.20

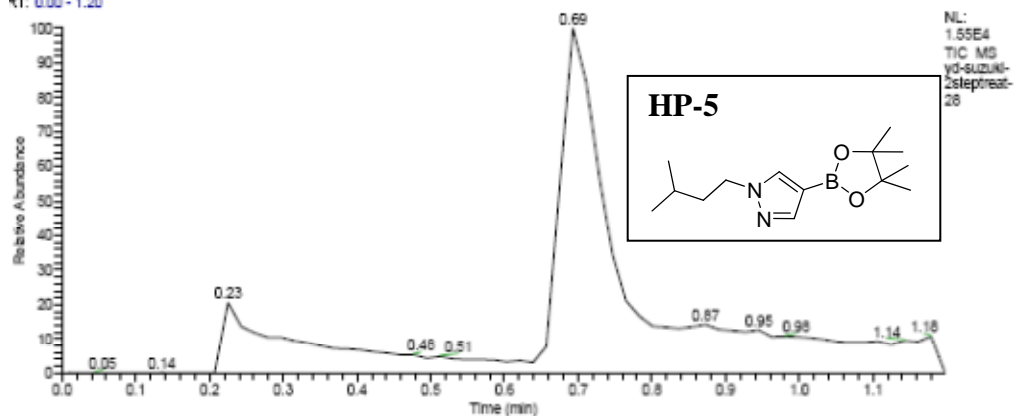

yd-suzuki-2stepreat-28 #36-51 RT: 0.64-0.91 AV: 16 NL: 8.91E2  
T: ITMS - c ESI Full ms [525.00-1950.00]

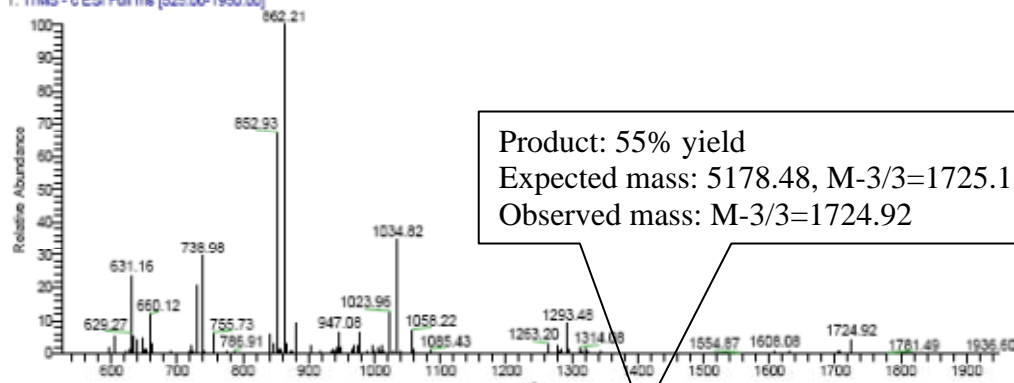

yd-suzuki-2stepreat-28 #36-47 RT: 0.64-0.84 AV: 12 NL: 4.85E1  
T: ITMS - c ESI Full ms [525.00-1950.00]

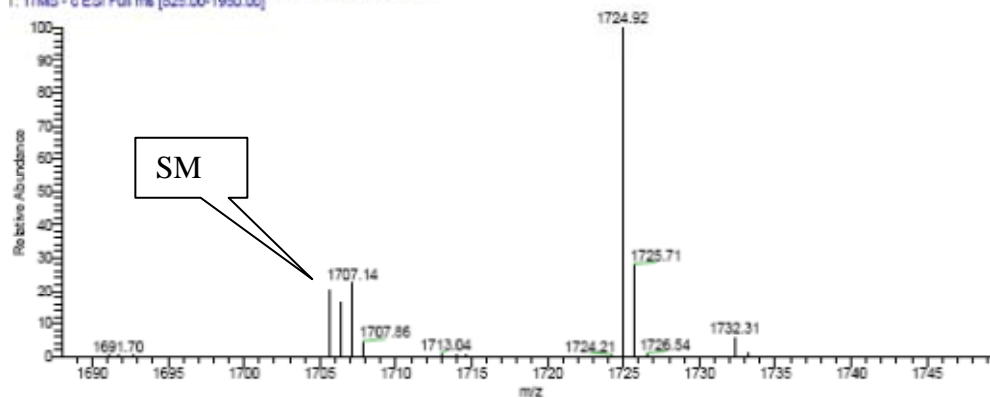

DT: Precursor Data: yd1260-127B0-5h 09/07/2009 7:09:47 PM

c1ccccc1B(O)O

RT: 3.39-7.39

RT: 3.39-3.49

yd1260-127B0-5h #95-102 RT: 3.37-3.14 AV: 7 NL: 3.87E5  
T: -c ES1 Full ms [400.00-2000.00]

De-Br byproduct:  
Expected mass: 5042.29,  $M-3/3=1679.28$   
Observed mass:  $M-3/3=1679.28$

yd1260-127B0-5h #105-125 RT: 3.23-3.77 AV: 21 NL: 1.62E7  
T: -c ES1 Full ms [400.00-2000.00]

Product: ca. 95% yield  
Expected mass: 5118.39,  $M-3/3=1704.66$   
Observed mass:  $M-3/3=1704.66$

Table 3, entry 2B:

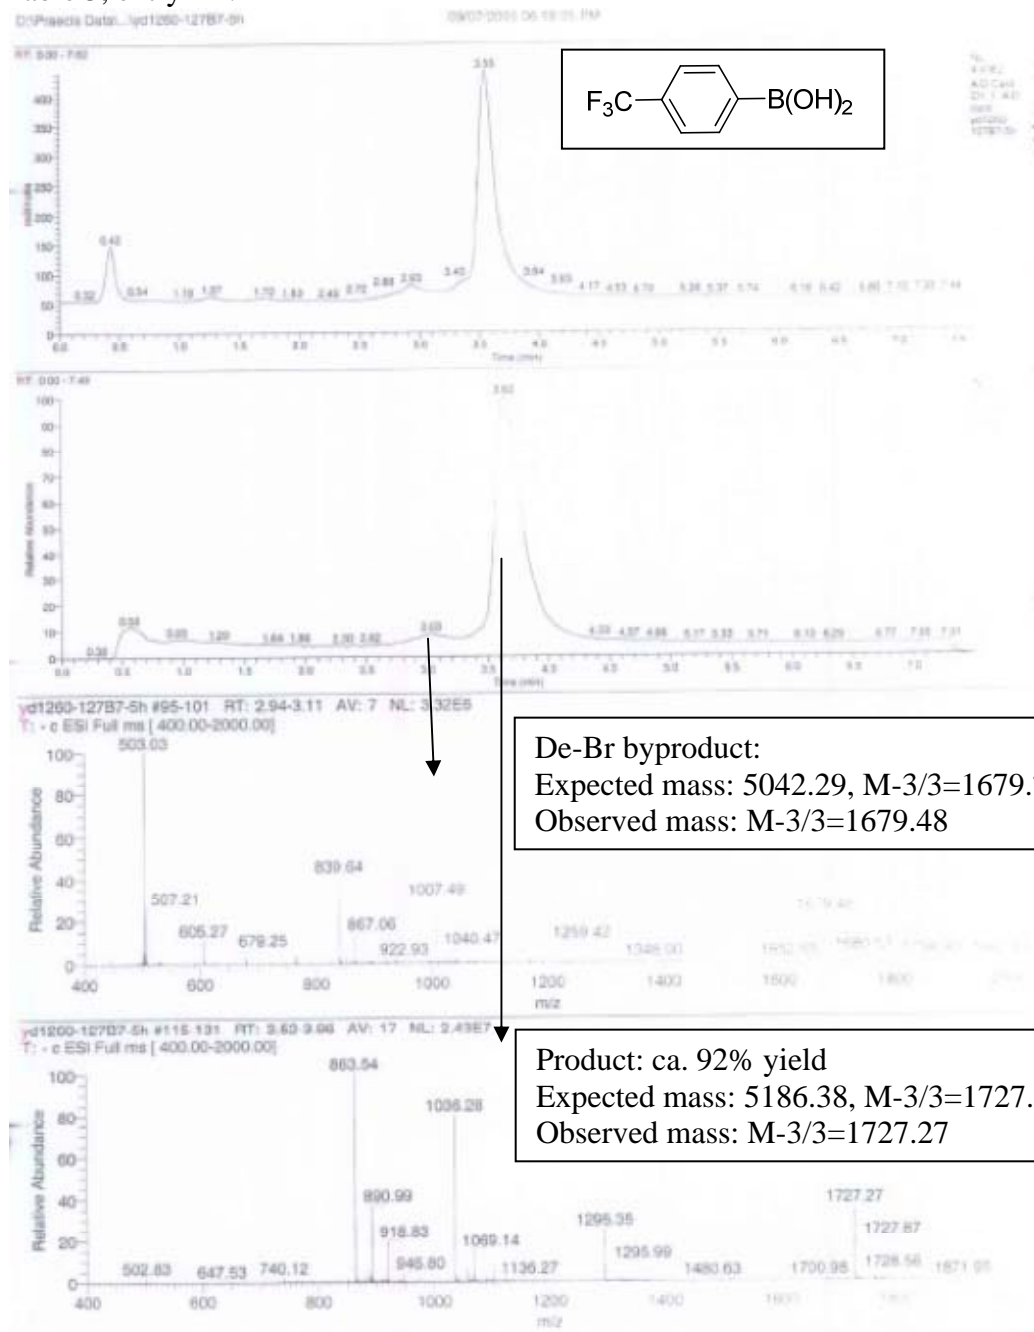

Table 3, entry 3B:

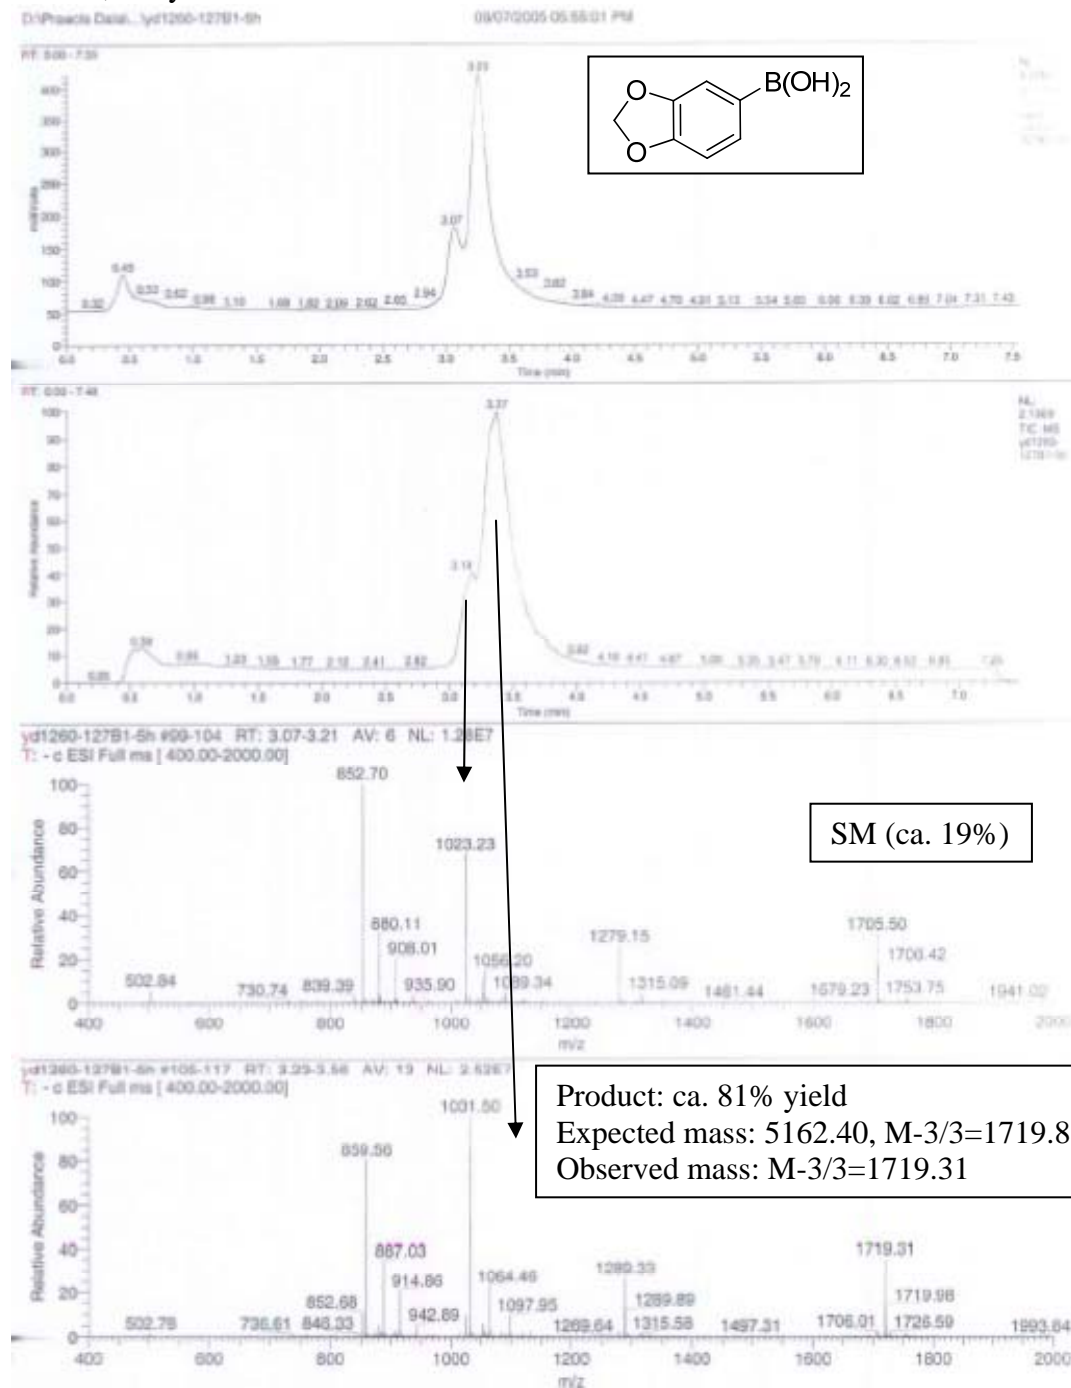



Table 3, entry 4B:

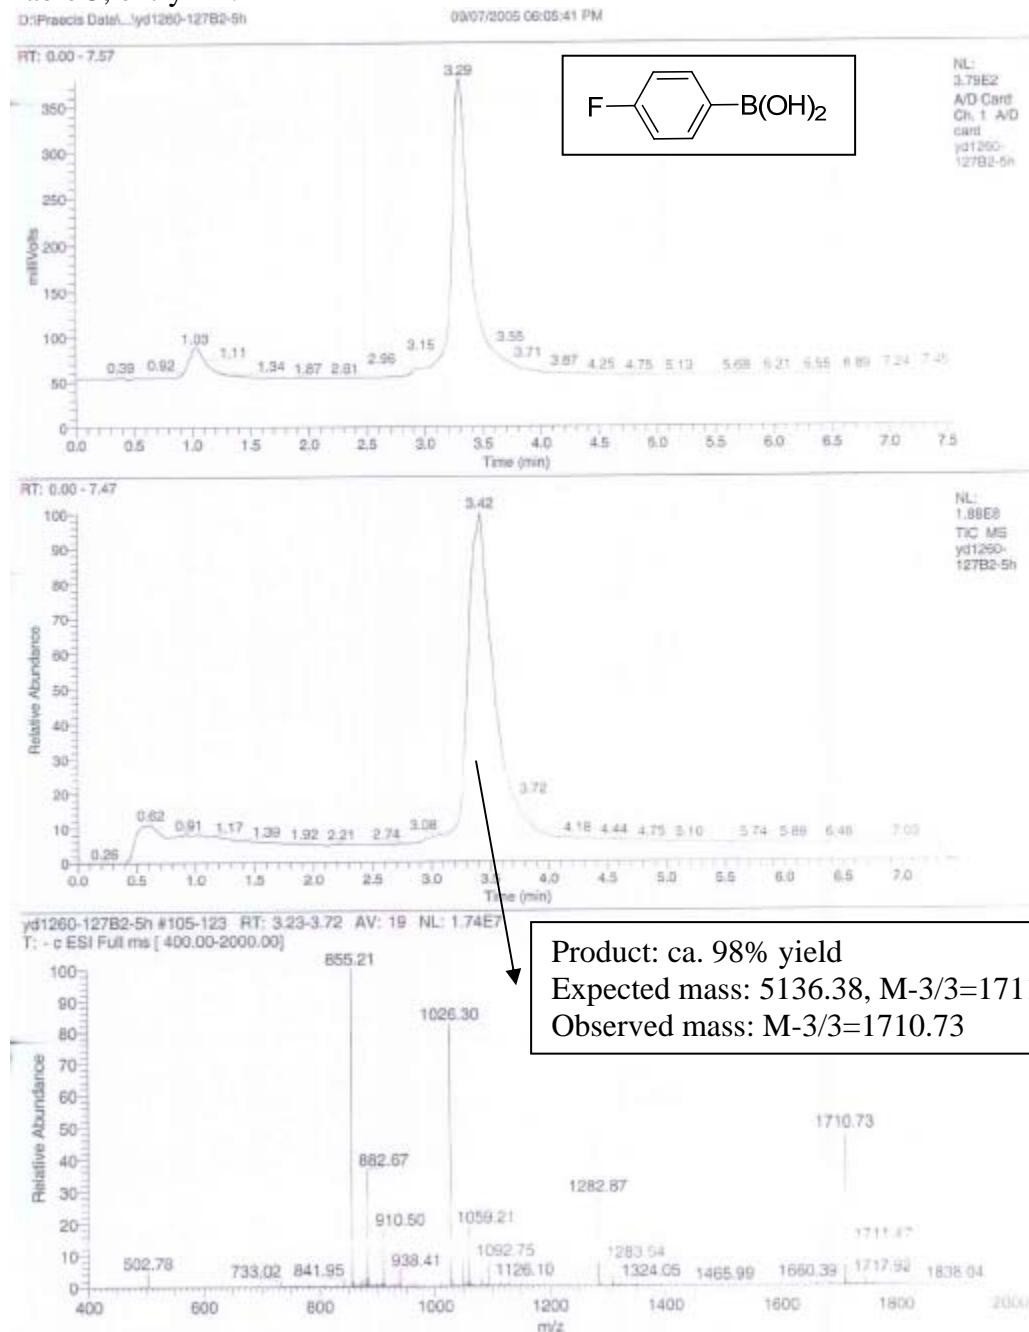

Table 3, entry 5B:

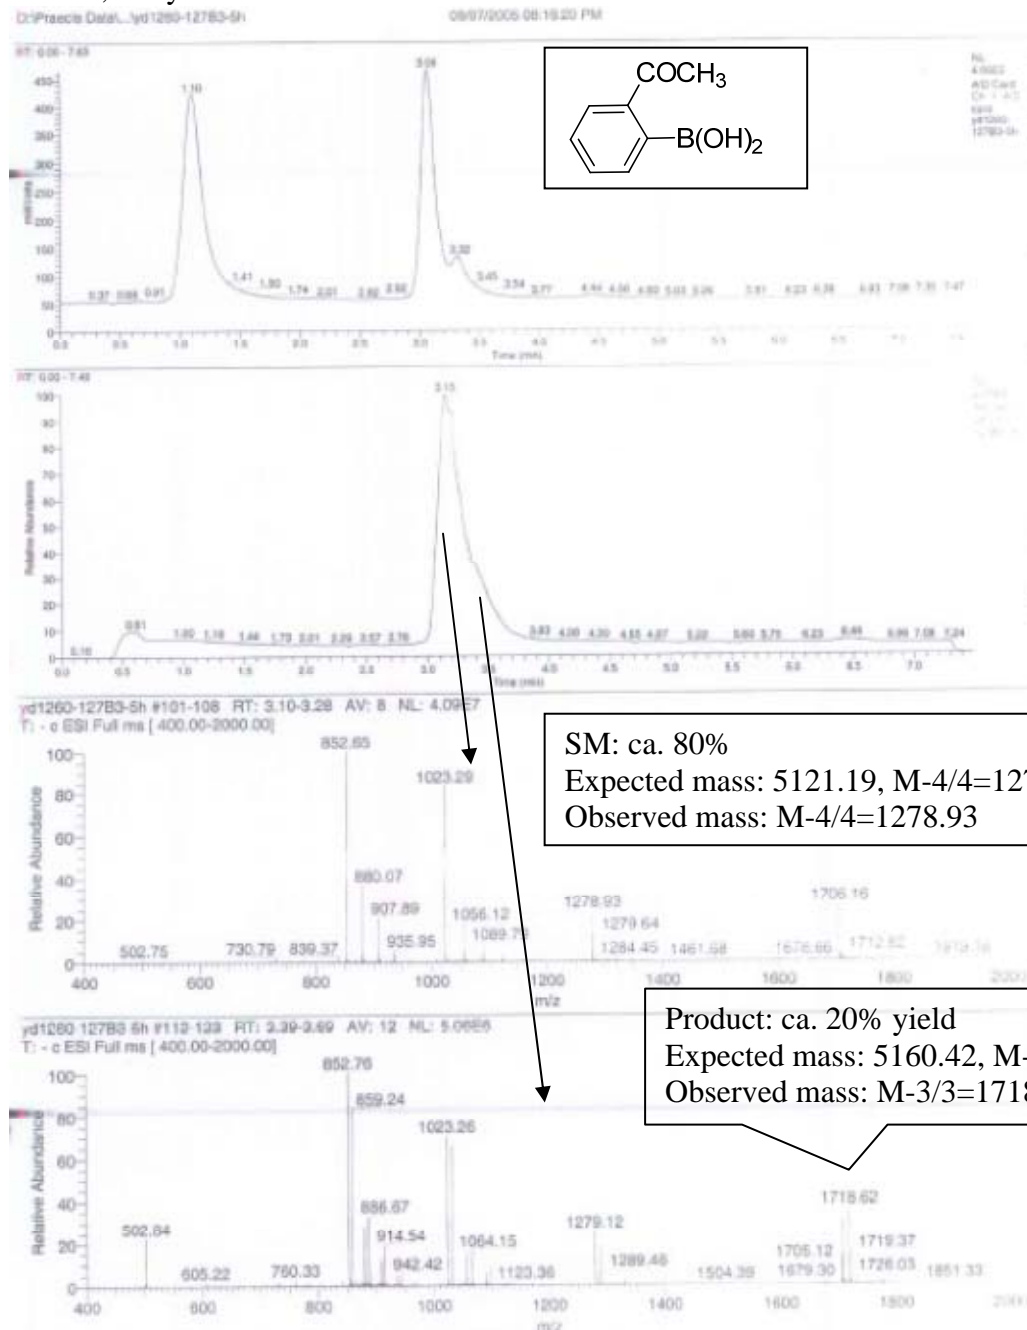

Table 3, entry 6B:

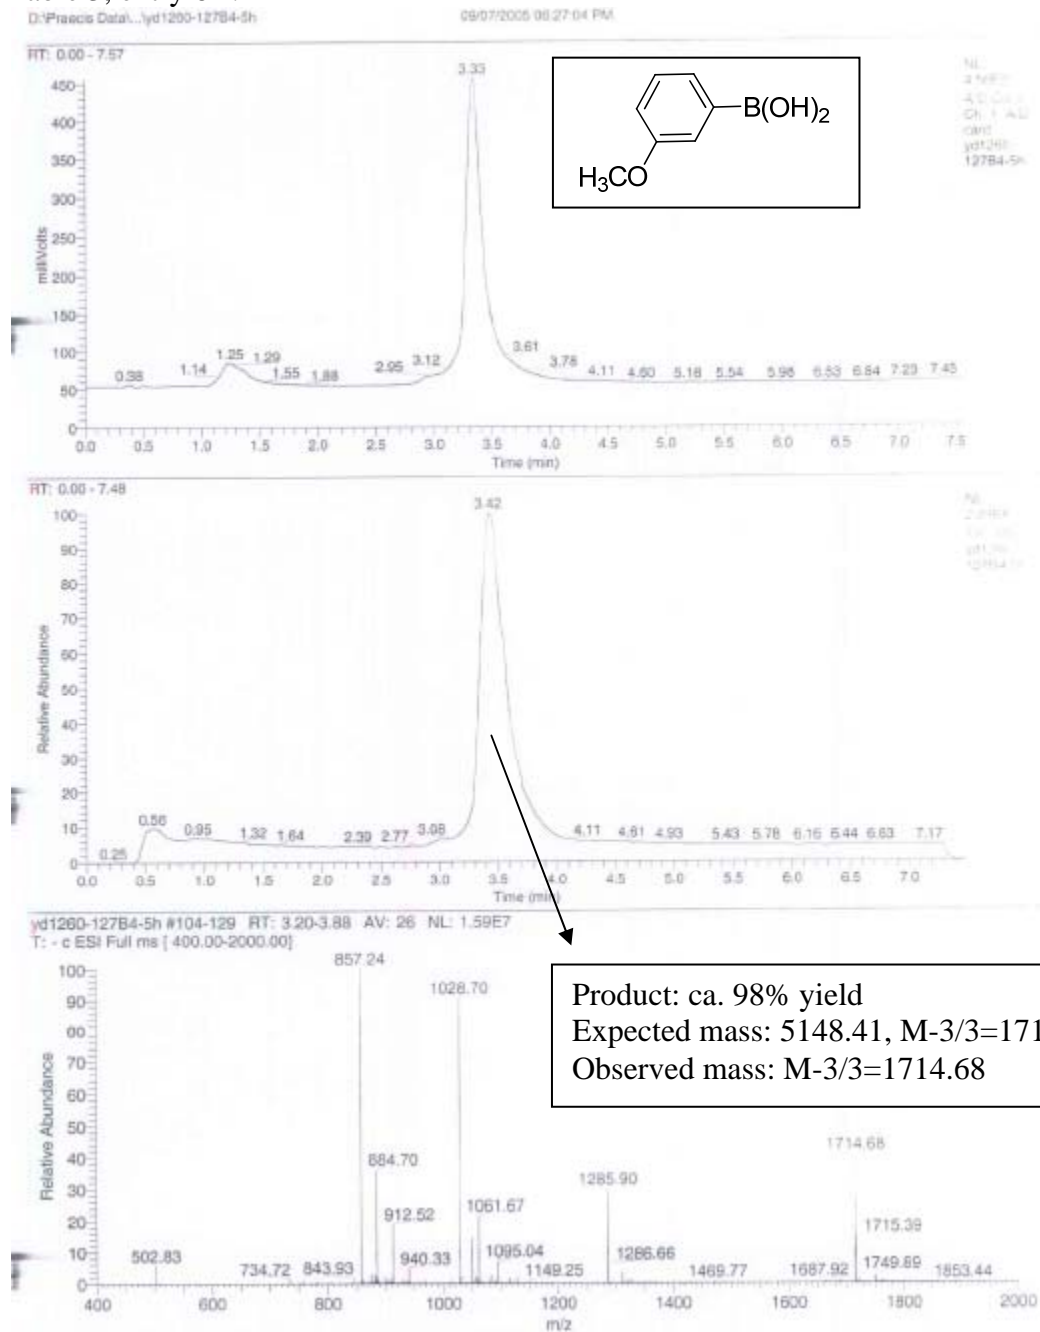

Table 3, entry 7B:

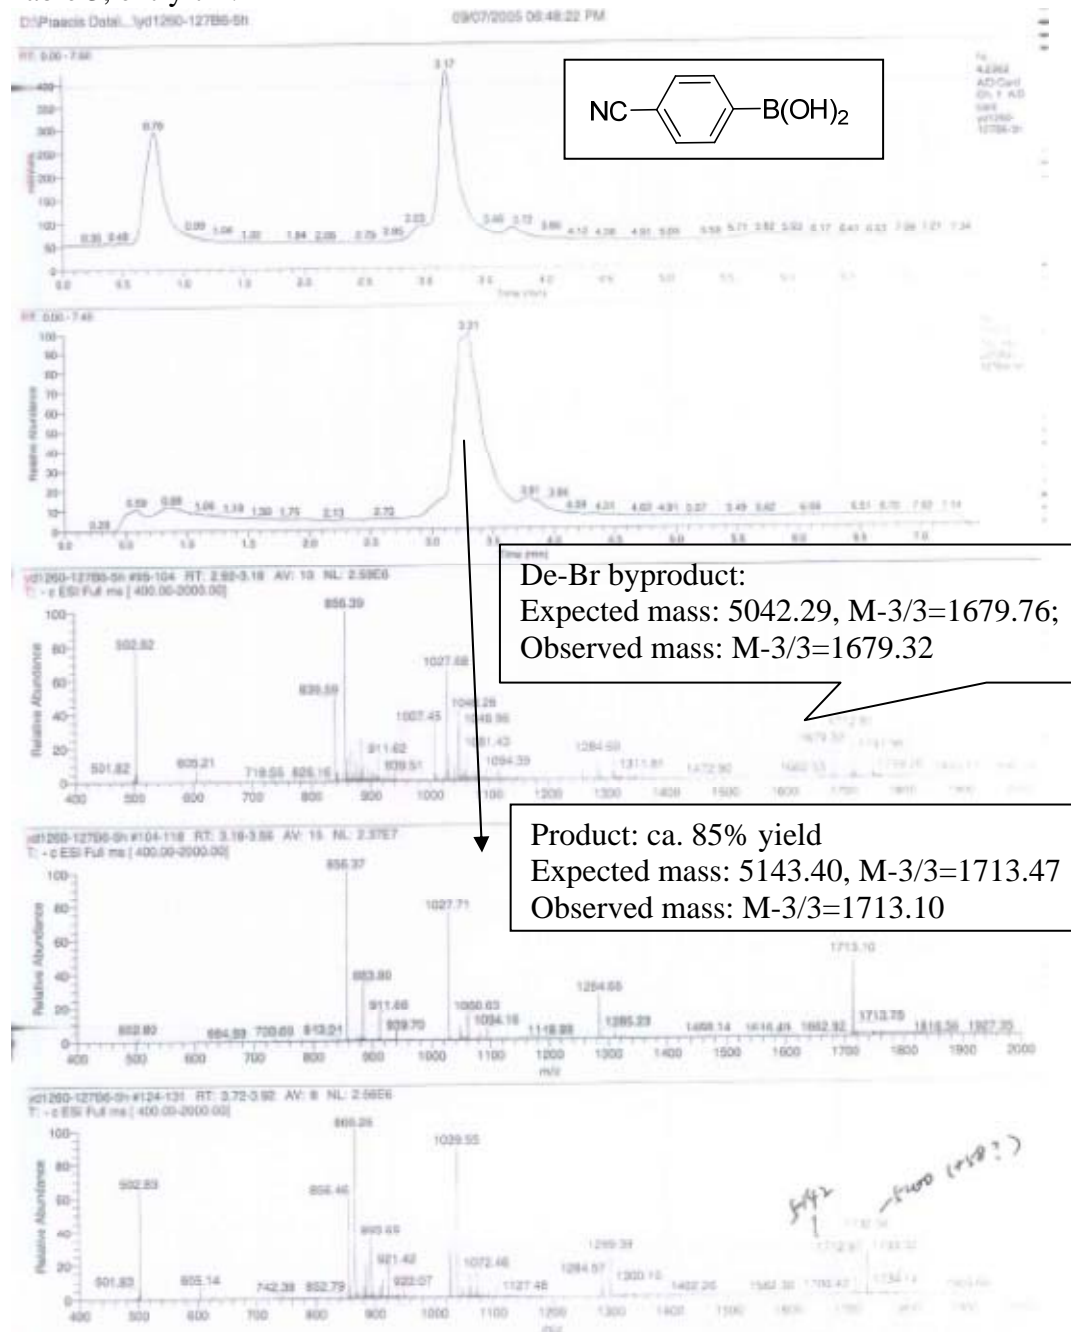

Table 3, entry 8B:

RT: 0.00 - 1.20

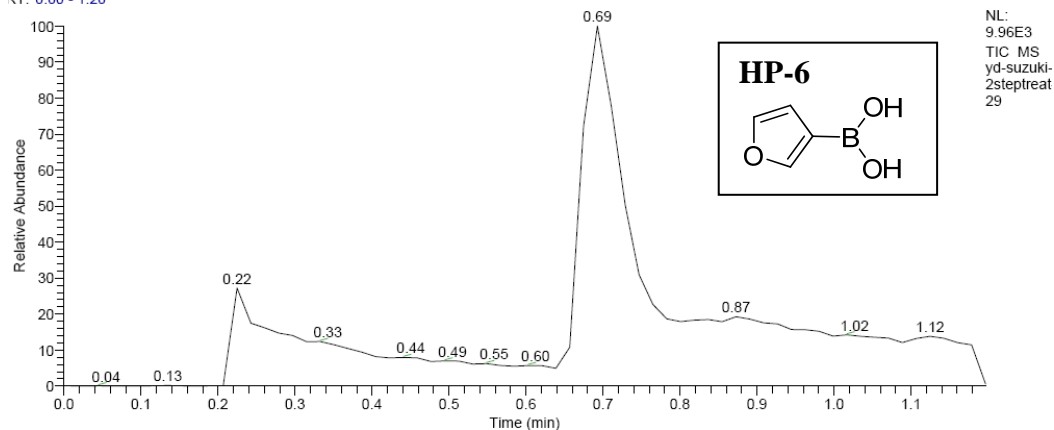

yd-suzuki-2septreat-29 #36-54 RT: 0.64-0.96 AV: 19 NL: 4.62E2  
T: ITMS - c ESI Full ms [525.00-1950.00]

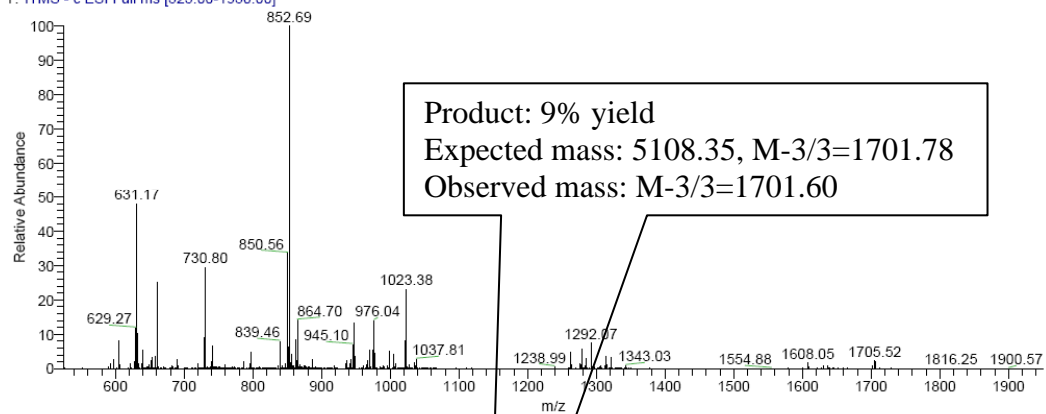

yd-suzuki-2septreat-29 #36-49 RT: 0.64-0.87 AV: 14 NL: 1.37E1  
T: ITMS - c ESI Full ms [525.00-1950.00]

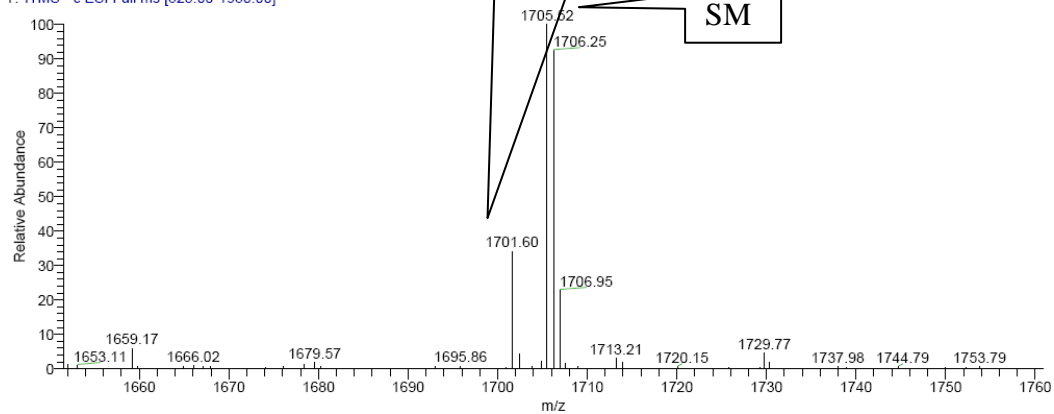

Table 3, entry 9B:

RT: 0.00 - 1.20

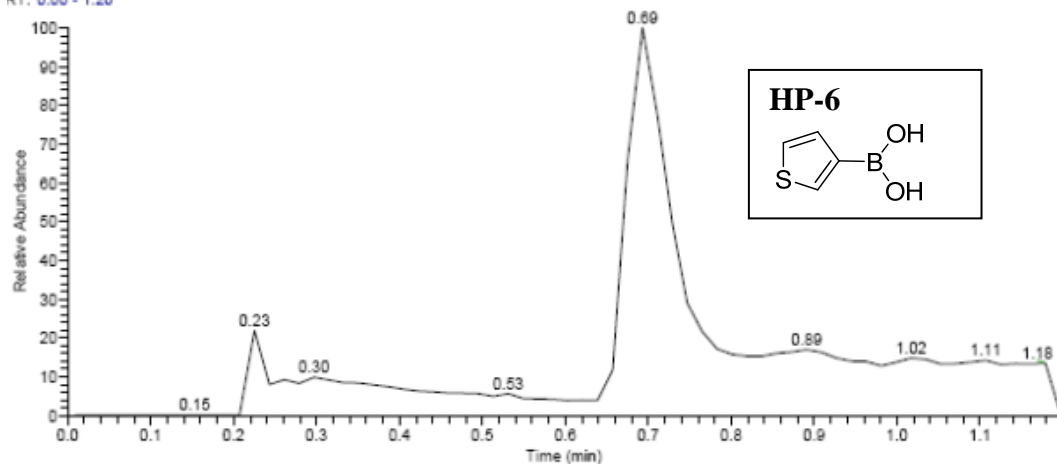

**HP-6**

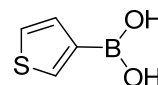

NL: 1.28E4  
TIC MS  
yd-suzuki-  
2septreat-  
30

yd-suzuki-2septreat-30 #36-46 RT: 0.64-0.82 AV: 11 NL: 1.95E3

T: ITMS - c ESI Full ms [525.00-1950.00]

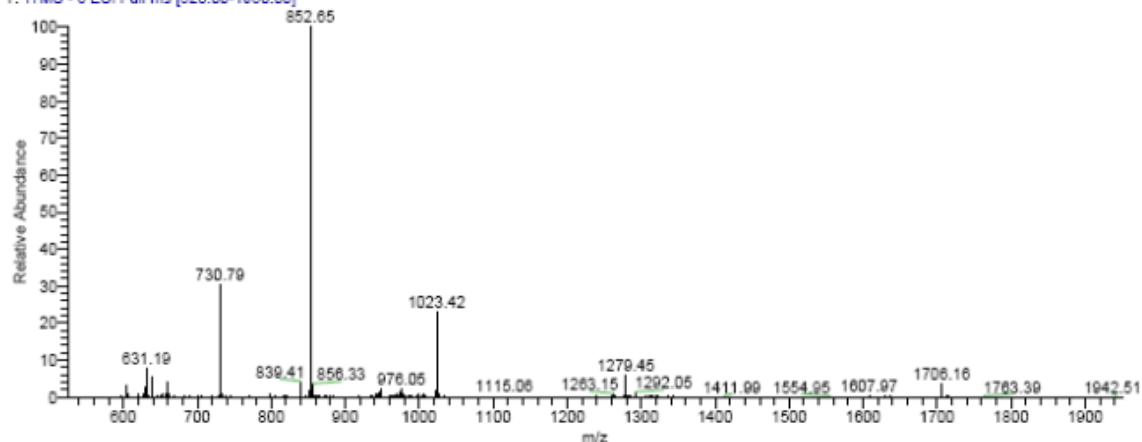

yd-suzuki-2septreat-30 #36-54 RT: 0.64-0.96 AV: 19 NL: 4.24E1

T: ITMS - c ESI Full ms [525.00-1950.00]

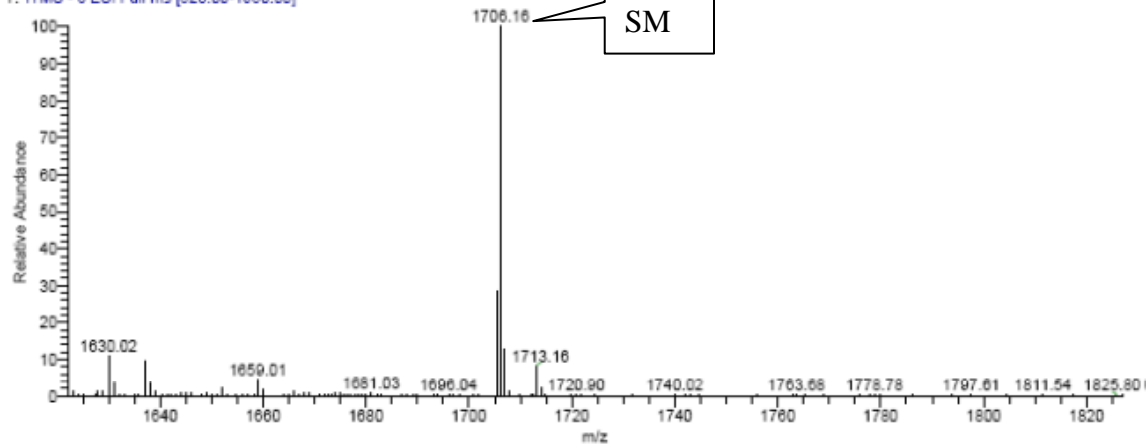

Table 3, entry 10B:

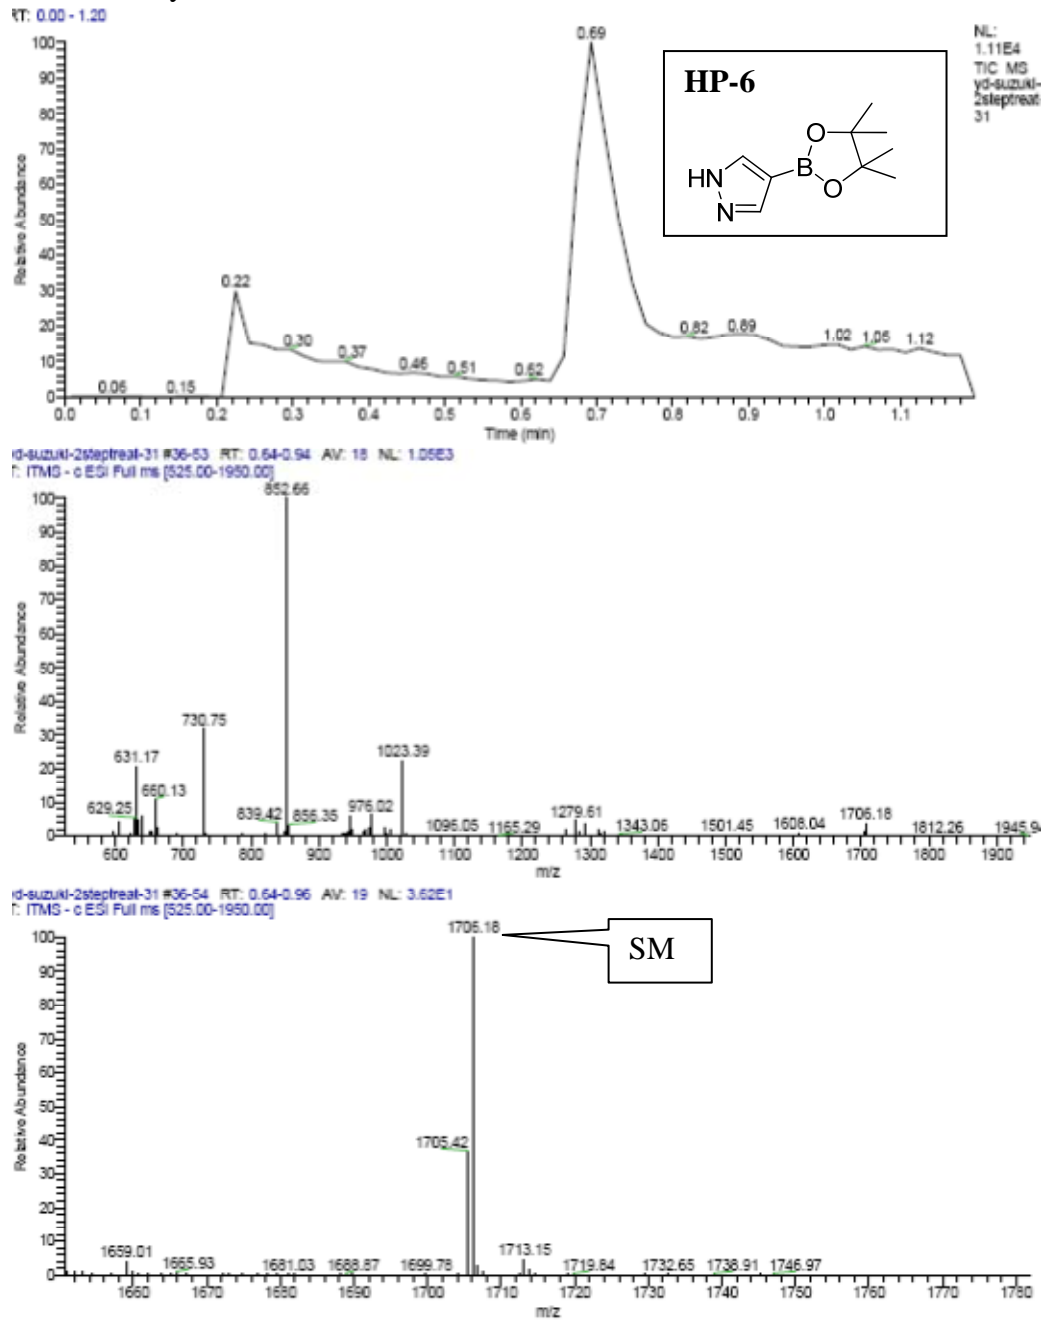



Table 3, entry 11B:

RT: 0.00 - 1.20

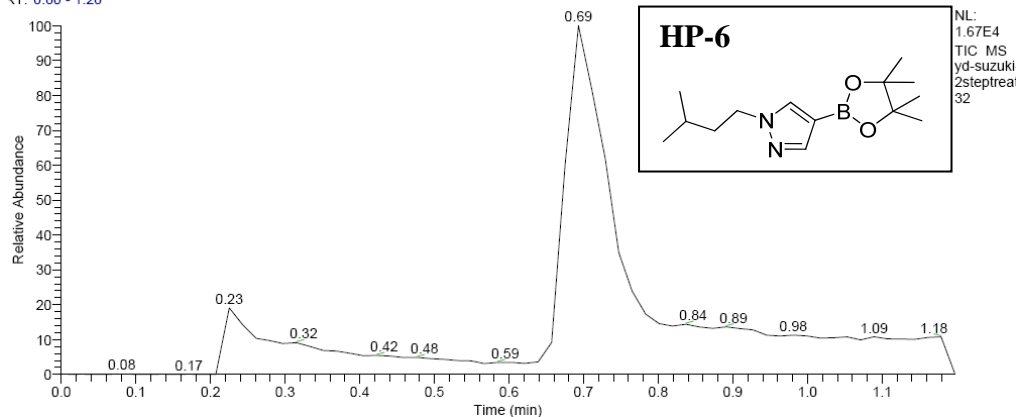

/d-suzuki-2steprea-32 #36-51 RT: 0.64-0.91 AV: 16 NL: 1.42E3  
T: ITMS - c ESI Full ms [525.00-1950.00]

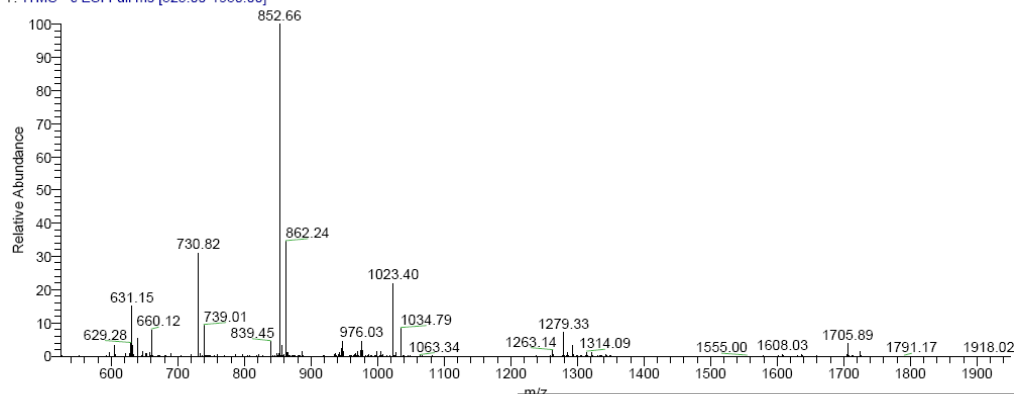

/d-suzuki-2steprea-32 #35-53 RT: 0.62-0.95 AV: 19 NL: 4.48E1  
T: ITMS - c ESI Full ms [525.00-1950.00]

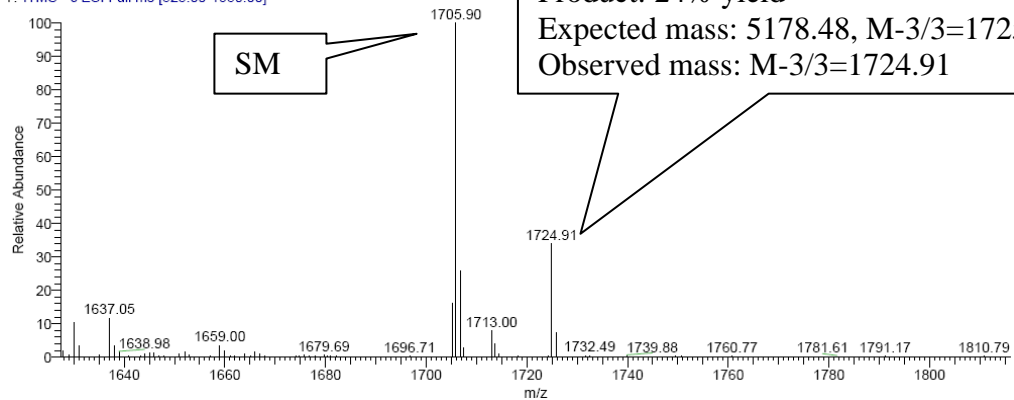

Table 3, entry 1C:

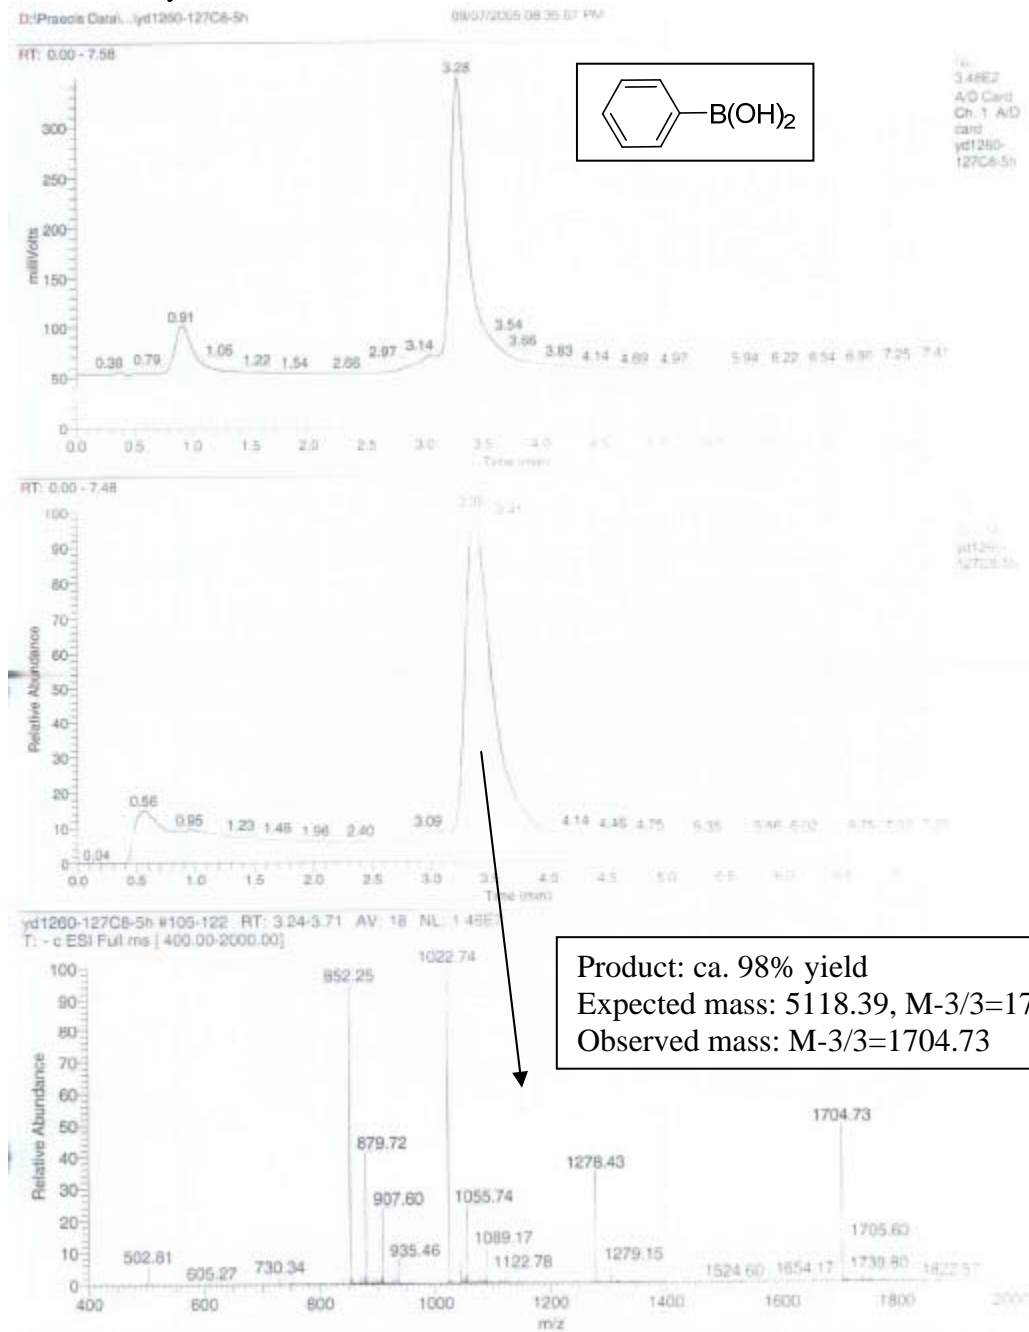

Table 3, entry 2C:

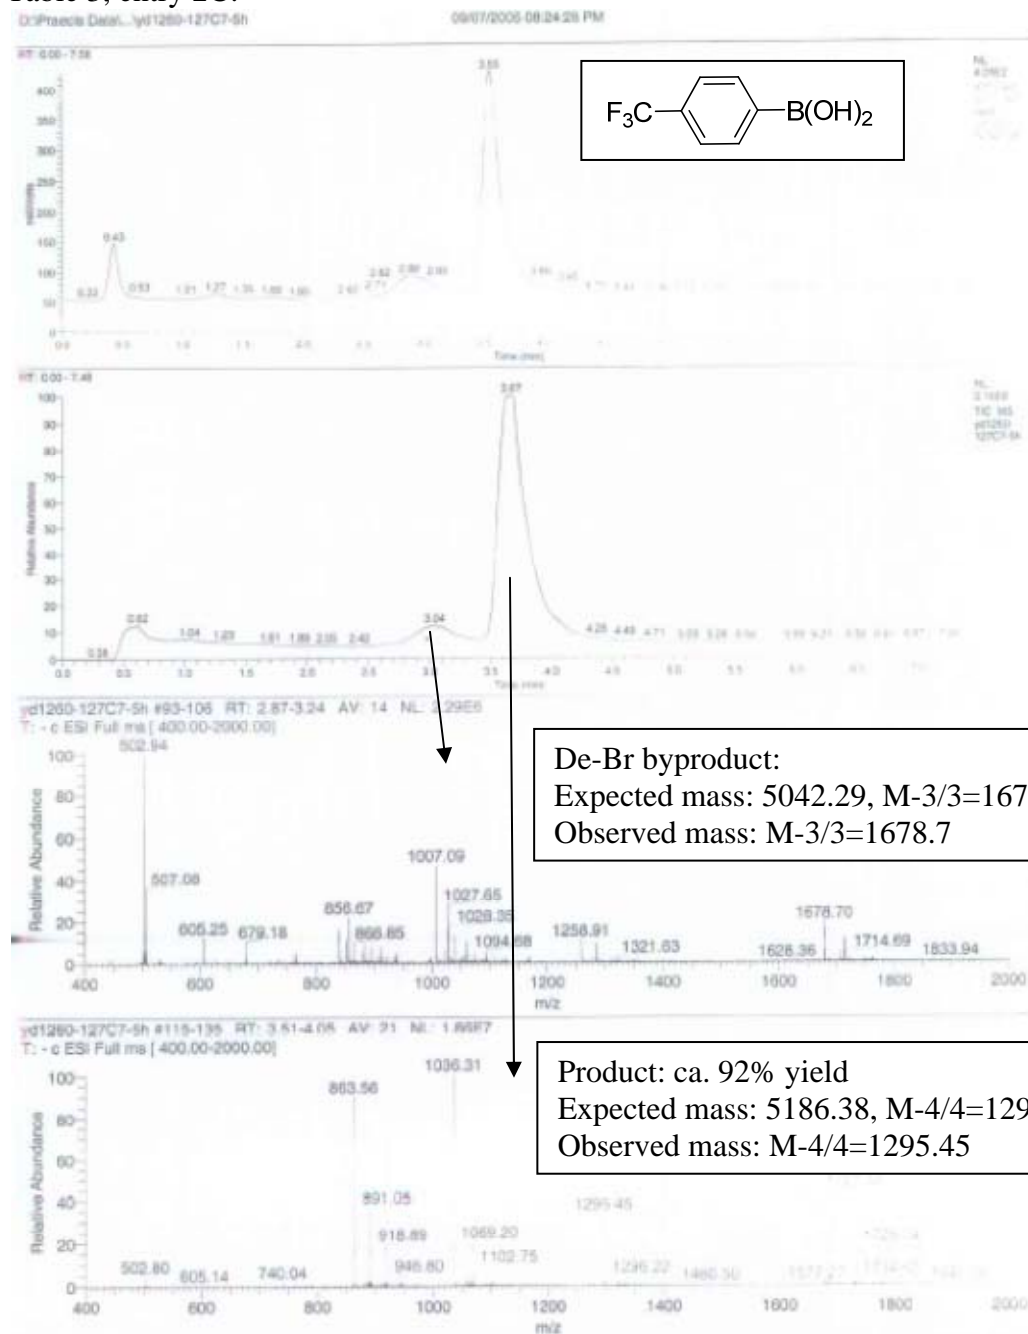

Table 3, entry 3C:

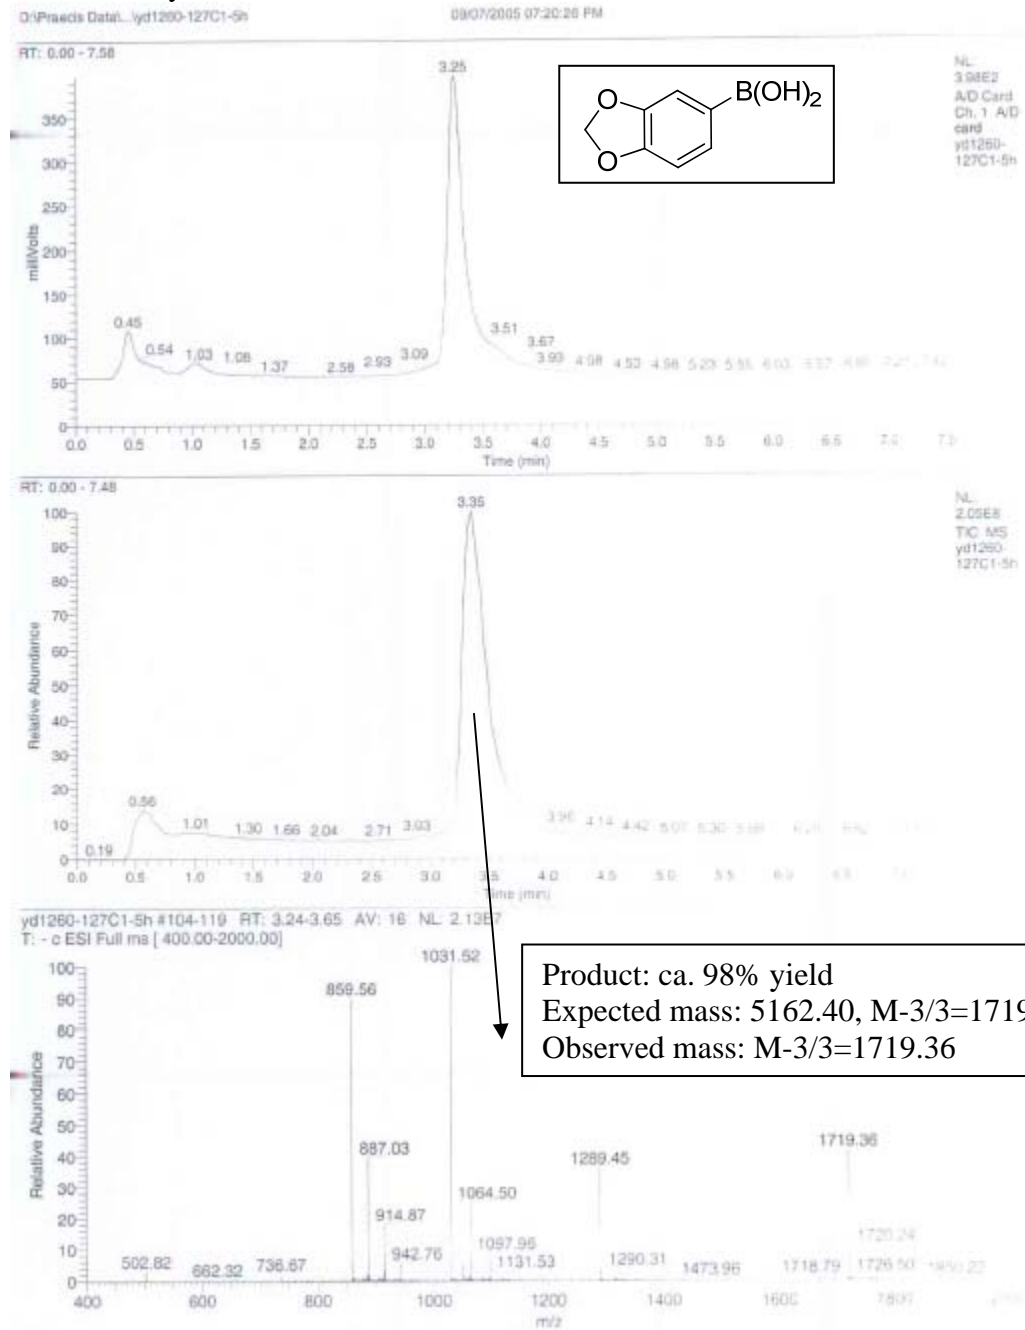

Table 3, entry 4C:

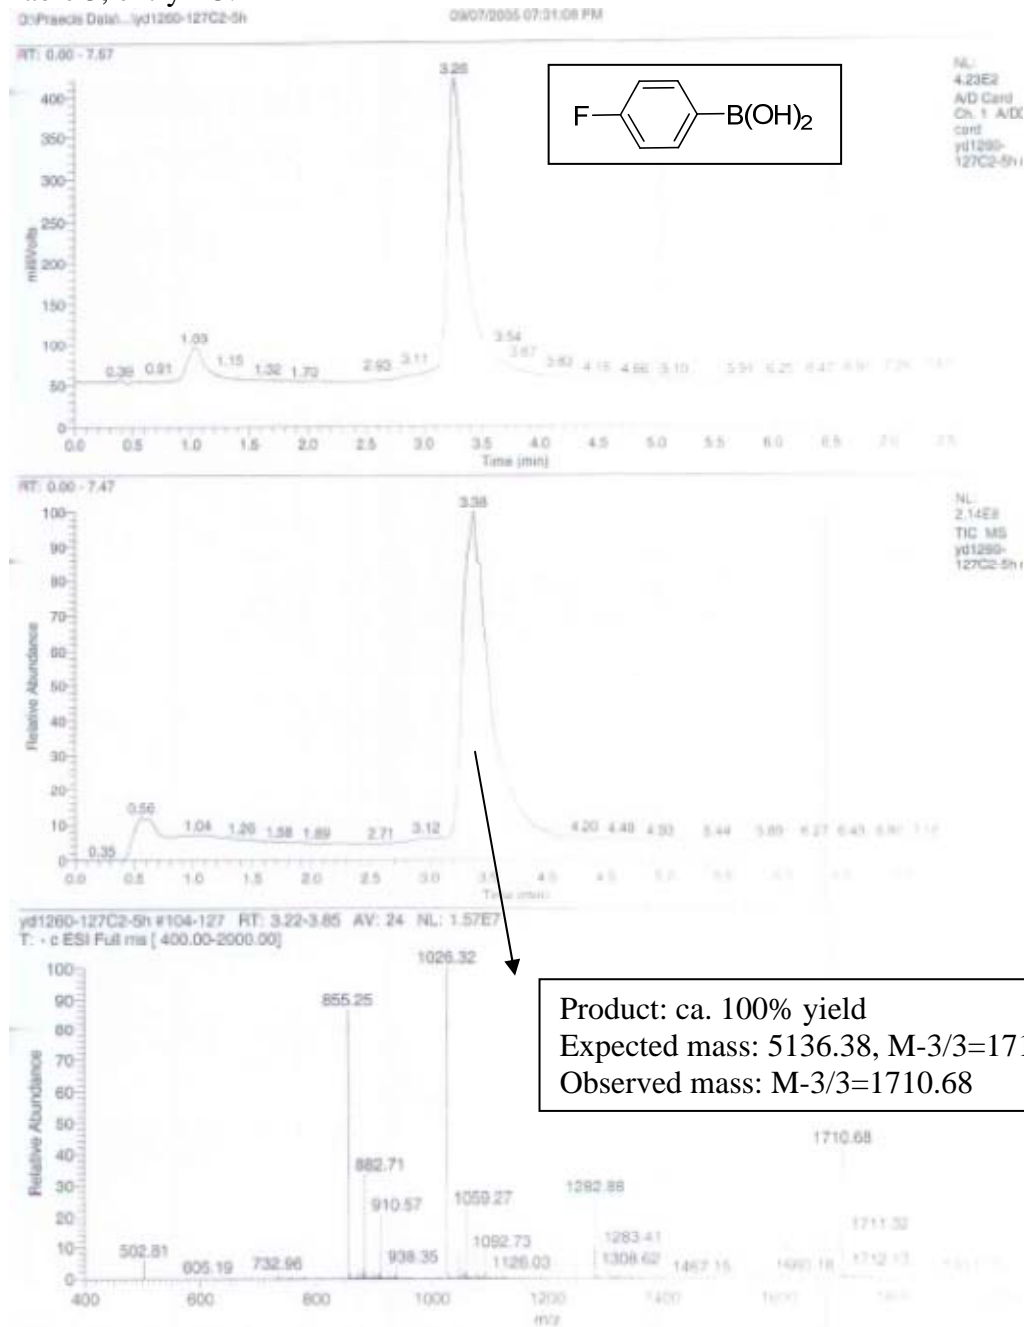

Table 3, entry 5C:

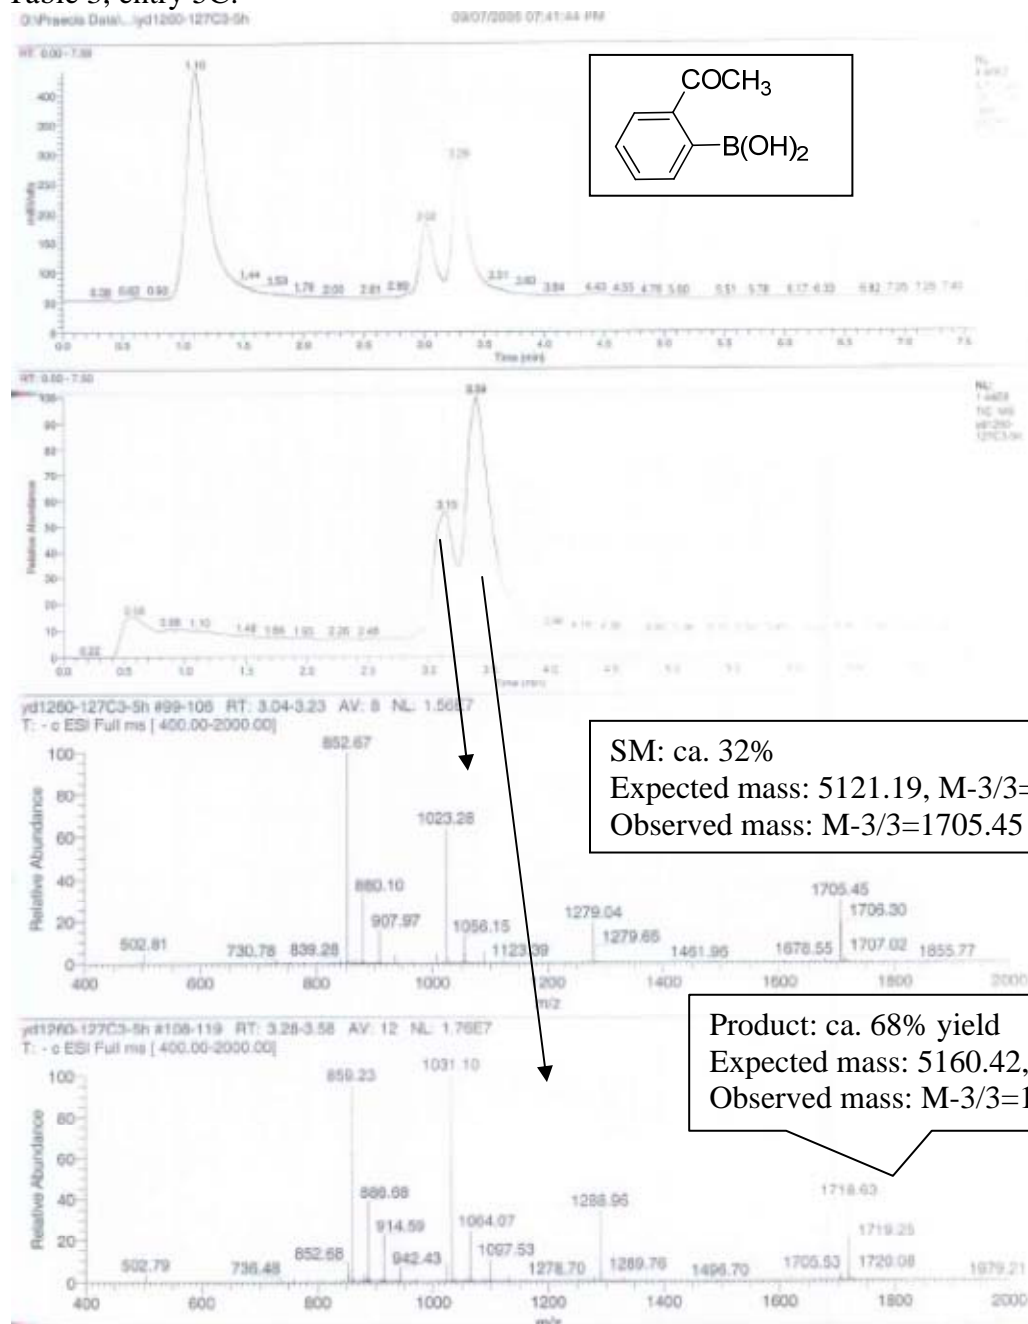

Table 3, entry 6C:

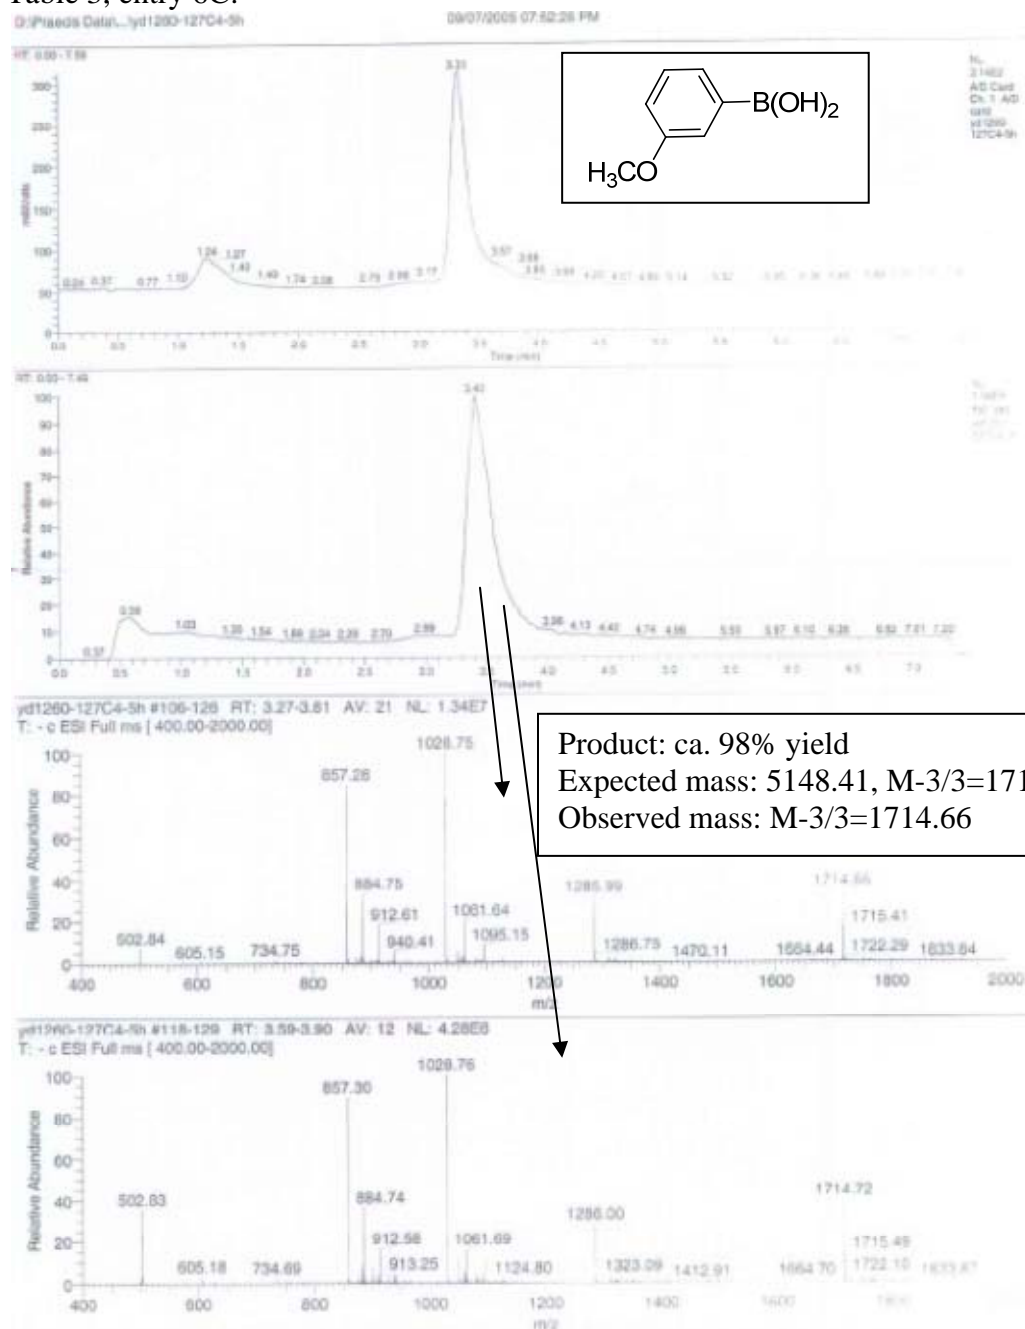



Table 3, entry 7C:

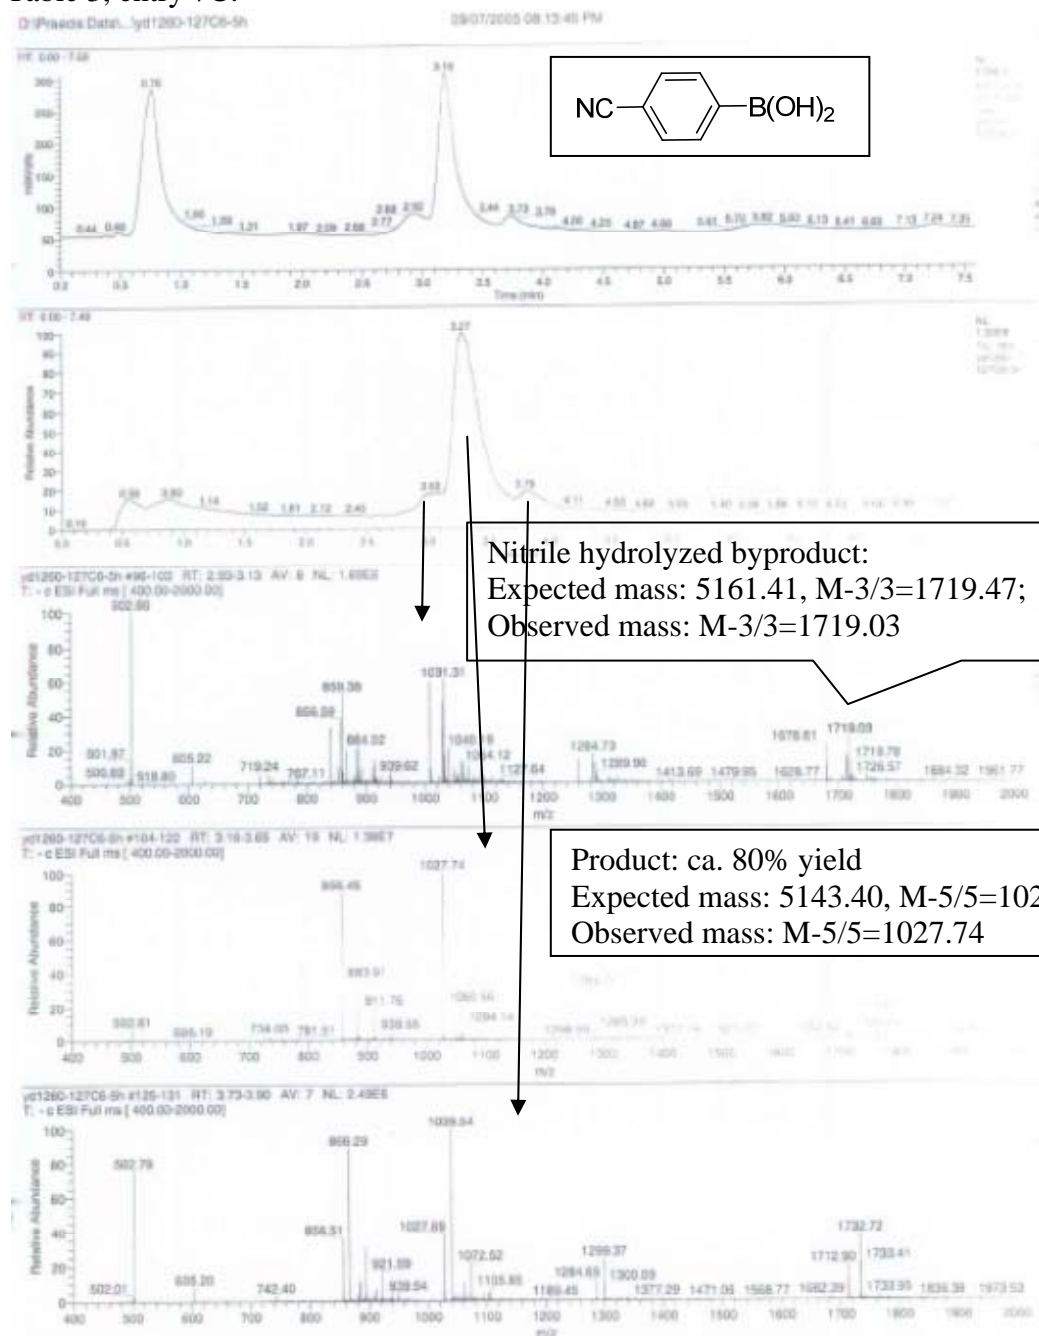

Table 3, entry 8C:

RT: 0.00 - 1.20

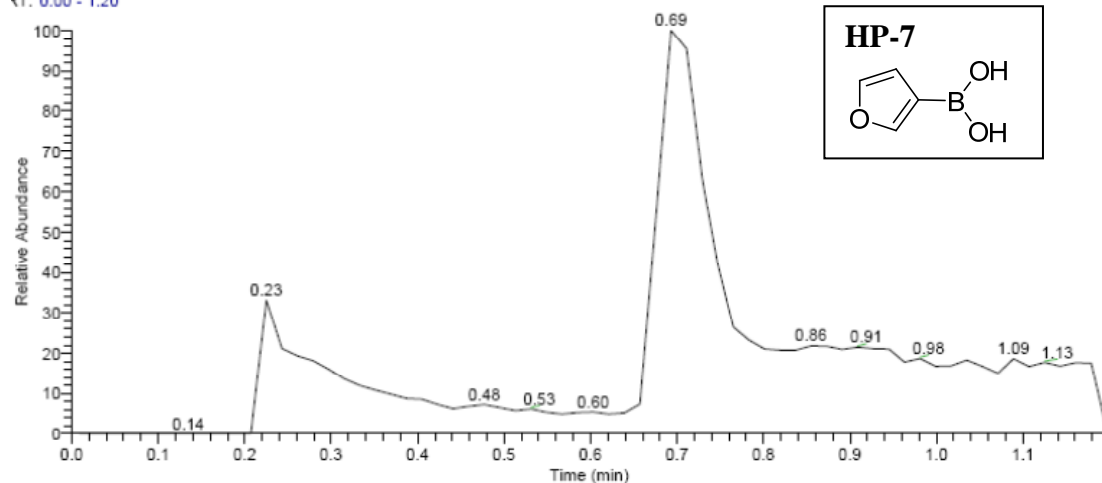

NL:  
8.08E3  
TIC MS  
yd-suzuki-  
2stepreat-  
33\_100331  
113253

rd-suzuki-2stepreat-33\_100331113253 #37-50 RT: 0.66-0.89 AV: 14 NL: 7.03E2  
T: ITMS - c ESI Full ms [525.00-1950.00]

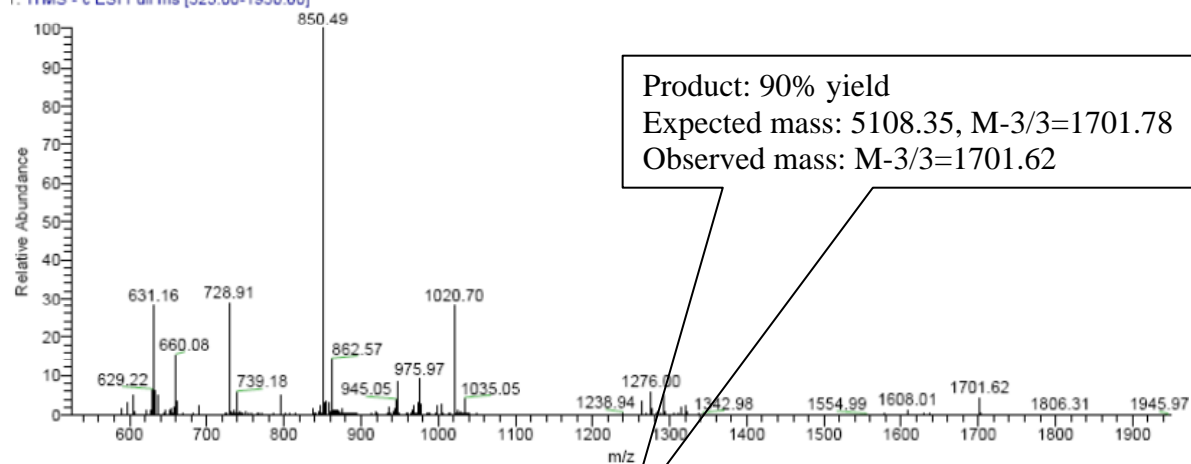

Product: 90% yield  
Expected mass: 5108.35,  $M-3/3=1701.78$   
Observed mass:  $M-3/3=1701.62$

rd-suzuki-2stepreat-33\_100331113253 #37-46 RT: 0.66-0.82 AV: 10 NL: 4.24E1  
T: ITMS - c ESI Full ms [525.00-1950.00]

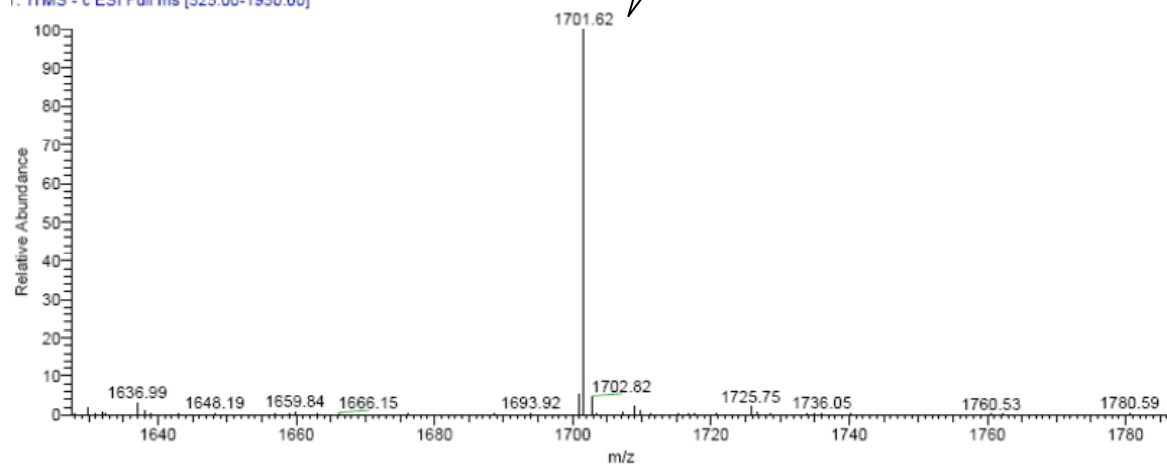

Table 3, entry 9C:

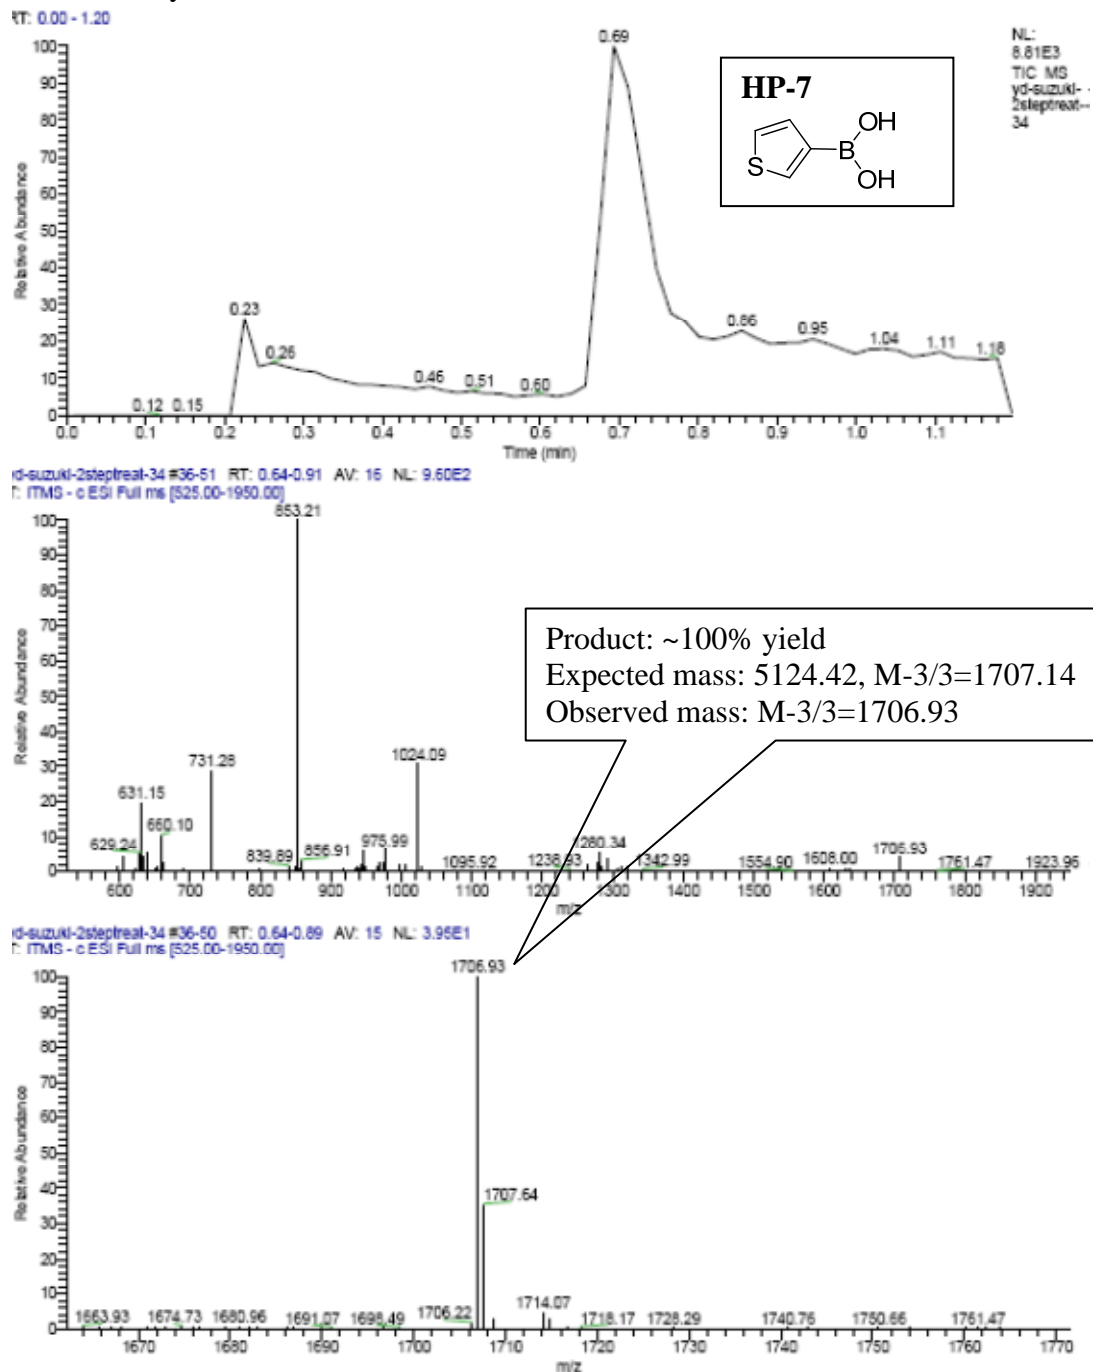

Table 3, entry 10C:

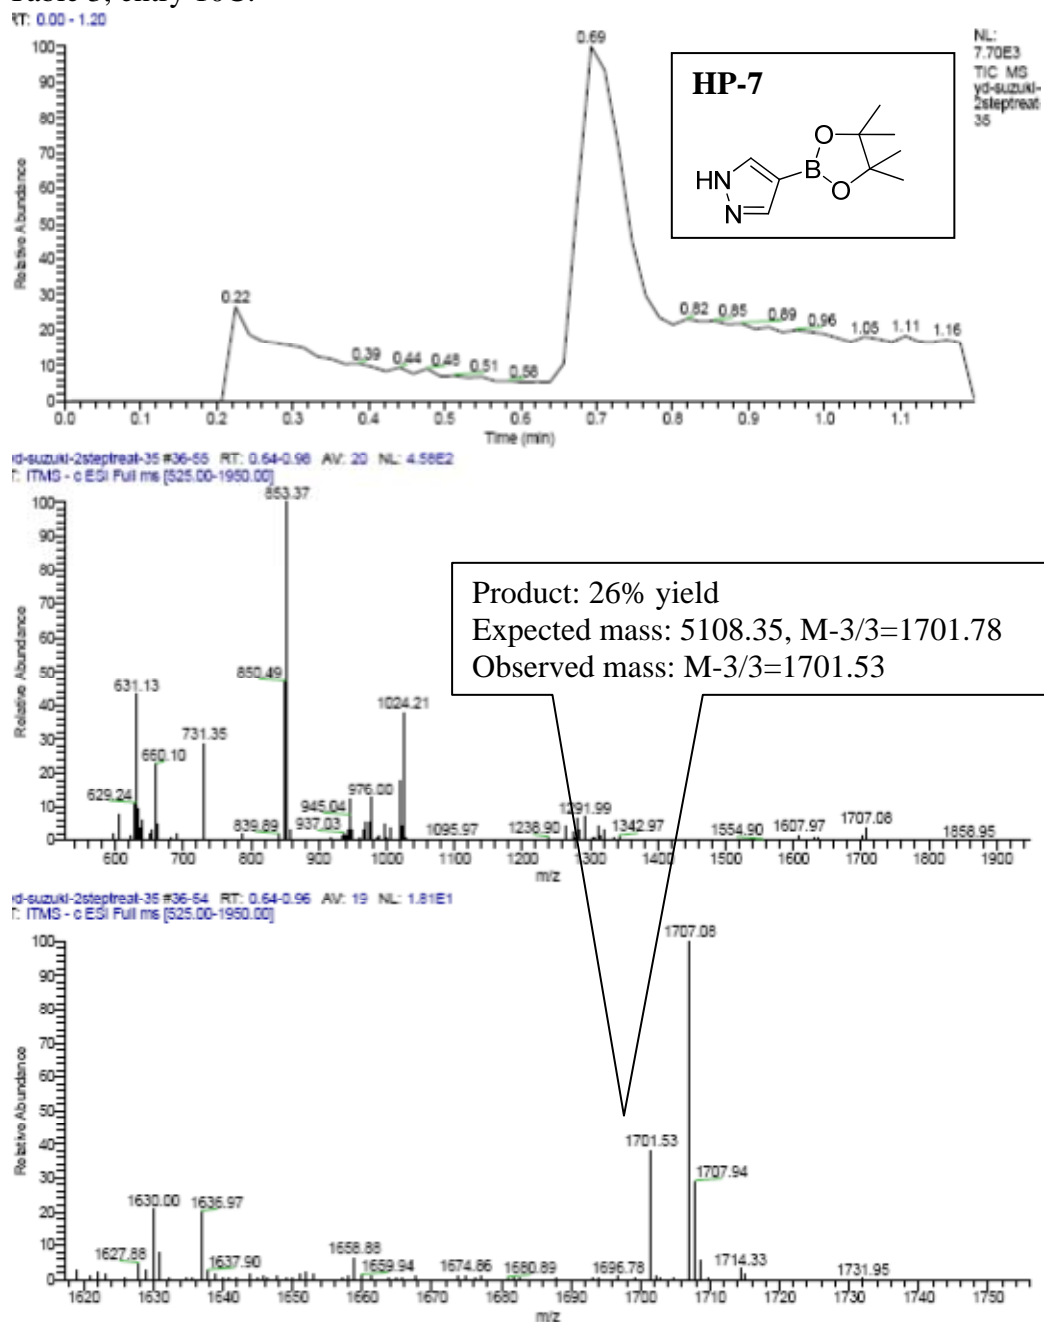

Table 3, entry 11C:

RT: 0.00 - 1.20

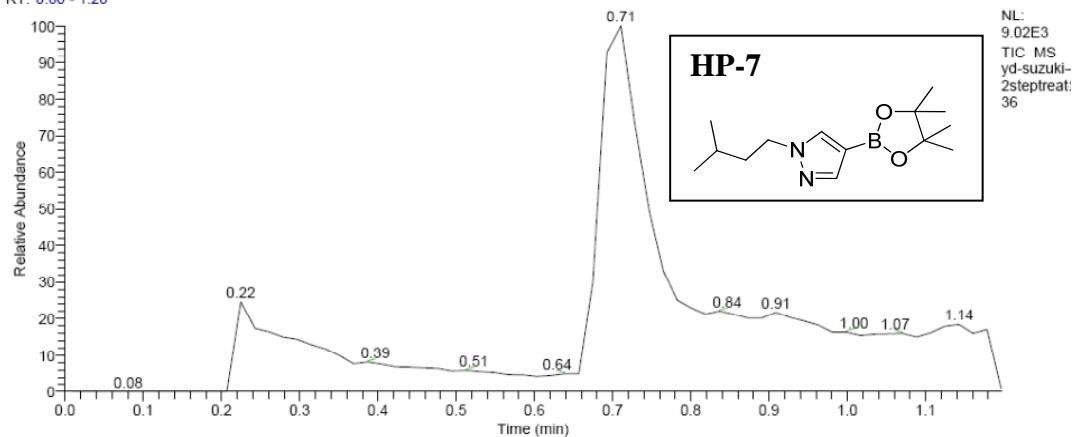

yd-suzuki-2stepreat-36 #37-54 RT: 0.66-0.96 AV: 18 NL: 8.48E2  
T: ITMS - c ESI Full ms [525.00-1950.00]

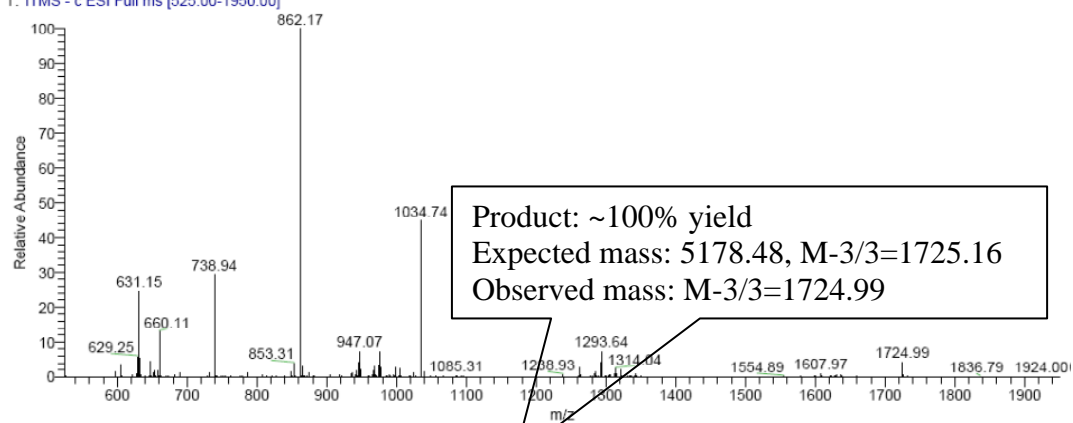

yd-suzuki-2stepreat-36 #37-49 RT: 0.66-0.87 AV: 13 NL: 4.91E1  
T: ITMS - c ESI Full ms [525.00-1950.00]

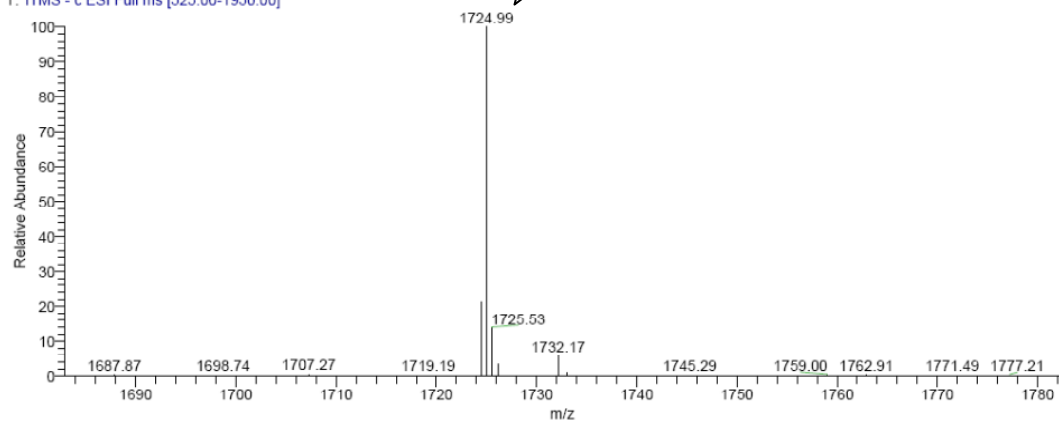

### Preparation of **HP-8**

A solution of AOP-HP<sup>1</sup> in pH9.4 borate buffer (250 mM) (0.5  $\mu$ mol, 500  $\mu$ L) was added at cold 40 equivalents of 5-formyl 3-iodobenzoic acid (1 M in DMF), followed by 40 equivalents of DMT-MM (400 mM in water). The reaction was kept in cold overnight. The reaction was further treated with piperidine (44  $\mu$ L) for 5 minutes, followed with precipitation by 10% 5N NaCl water solution and 2.5 times volume of absolute EtOH. The pellet was redissolved in pH5.5 phosphate buffer (250mM) to make 1mM concentration. To the above solution was added 50 equivalents of phenylalanine (400 mM in H<sub>2</sub>O/DMA 5/1), followed by adding 50 equivalents of NaCNBH<sub>3</sub> (400 mM in DMA). The reaction was heated at 50 °C for 3 hours, followed with precipitation by 10% 5N NaCl water solution and 2.5 times volume of absolute EtOH. The pellet of **HP-8** which contained about 25% of reduced starting material was redissolved in water (100  $\mu$ L), followed by EtOH precipitation once more. The pellet was dissolved in water to make 1 mM concentration of solution, which would be used directly for the next step without further purification.

**HP-8**: expected mass 5591.69 (M-3/3=1862.90), observed 5590 (M-3/3=1862.2)

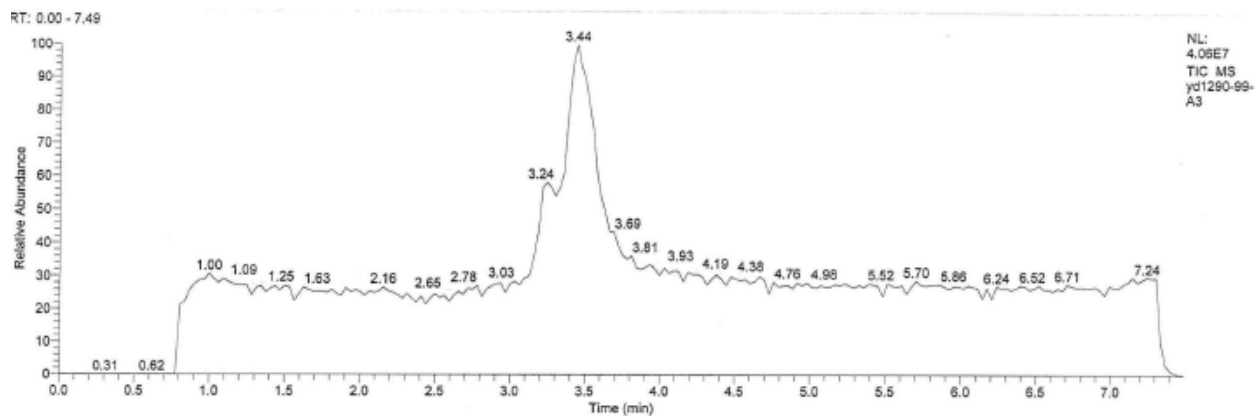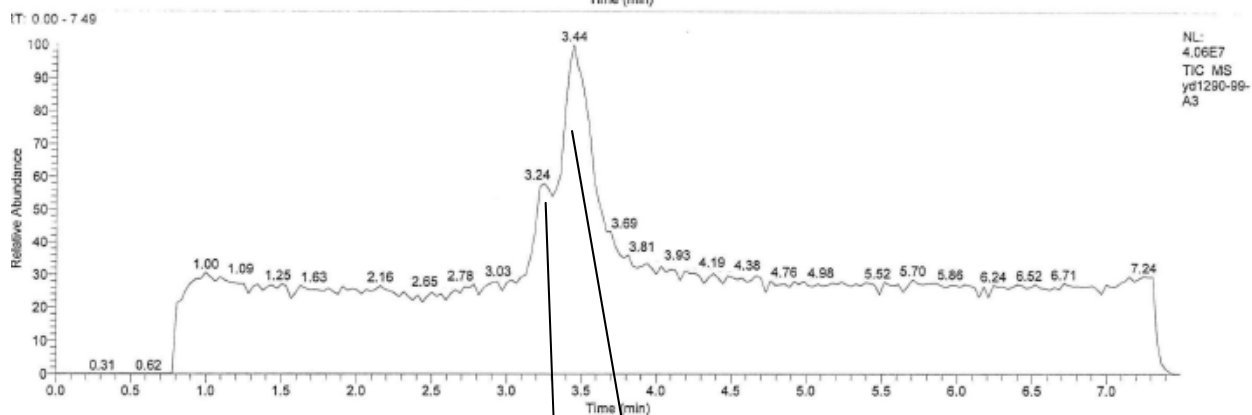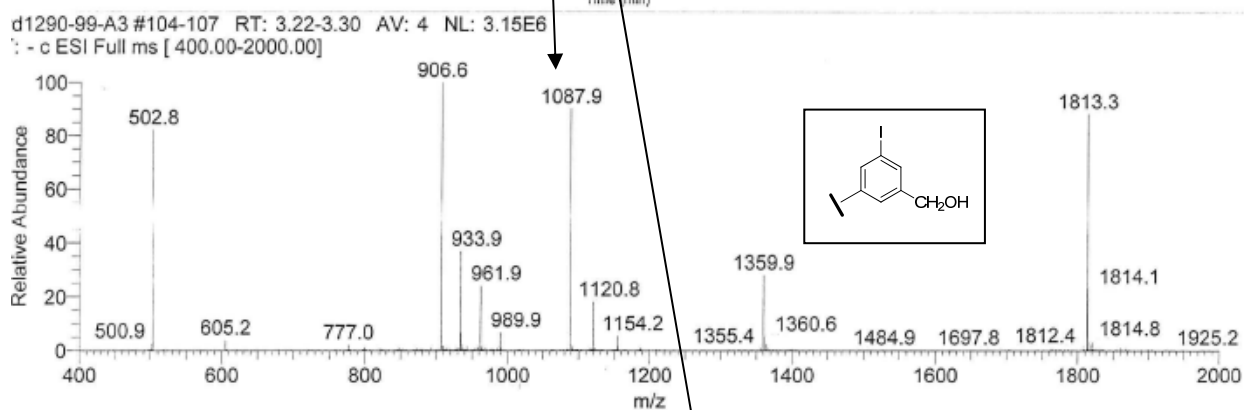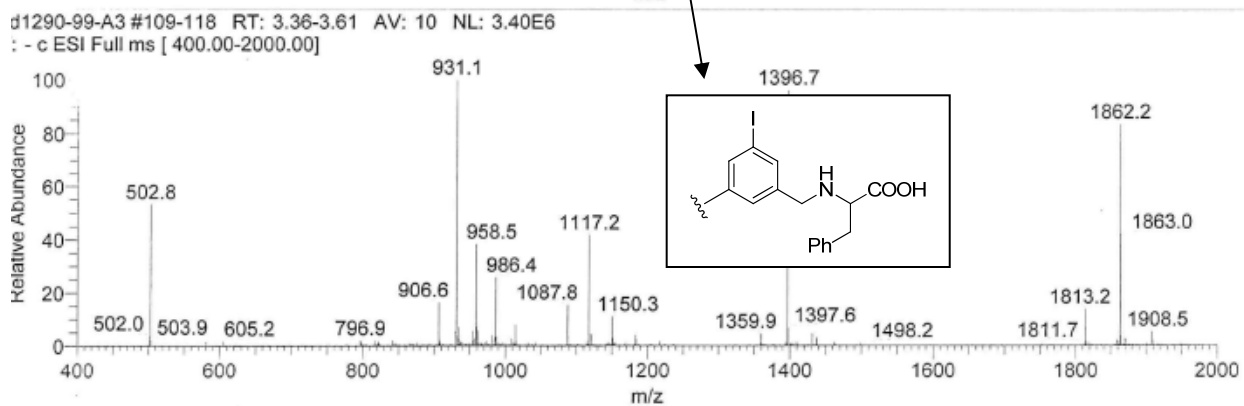



General procedure for the coupling of **HP-8** with boronic acids/esters in Scheme 3.

A 1 mM solution of **HP-8** in water (10 nmol, 10  $\mu$ L) was added 40 equivalents of boronate (0.67  $\mu$ L, 600 mM in DMA) and 80 equivalents of  $\text{Na}_2\text{CO}_3$  (0.67  $\mu$ L, 1.2 M in water), followed by 1 equivalent of degassed  $\text{Pd}(\text{PPh}_3)_4$  (3.3  $\mu$ L, 3 mM in  $\text{CH}_3\text{CN}$ ). The reaction was allowed to proceed at 80  $^\circ\text{C}$  for 4 hrs.

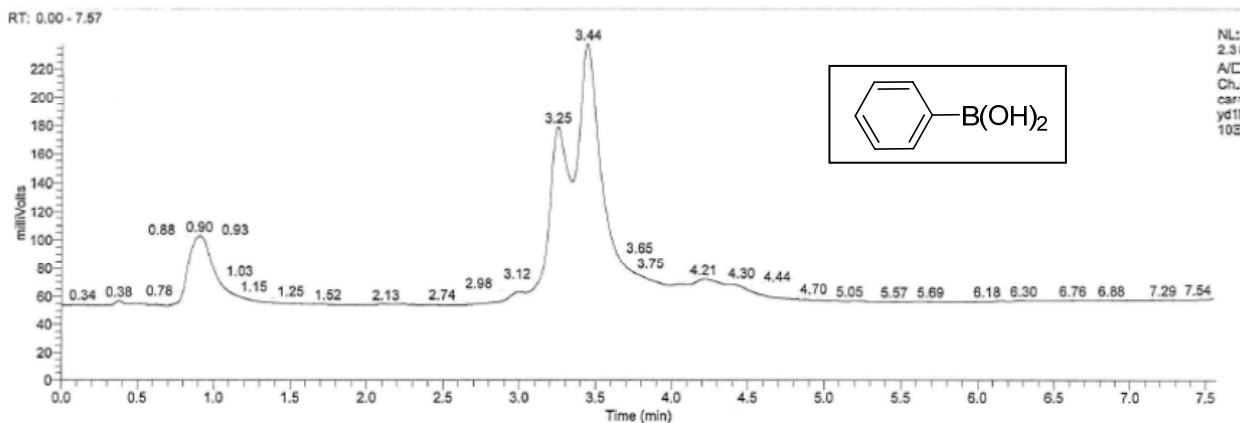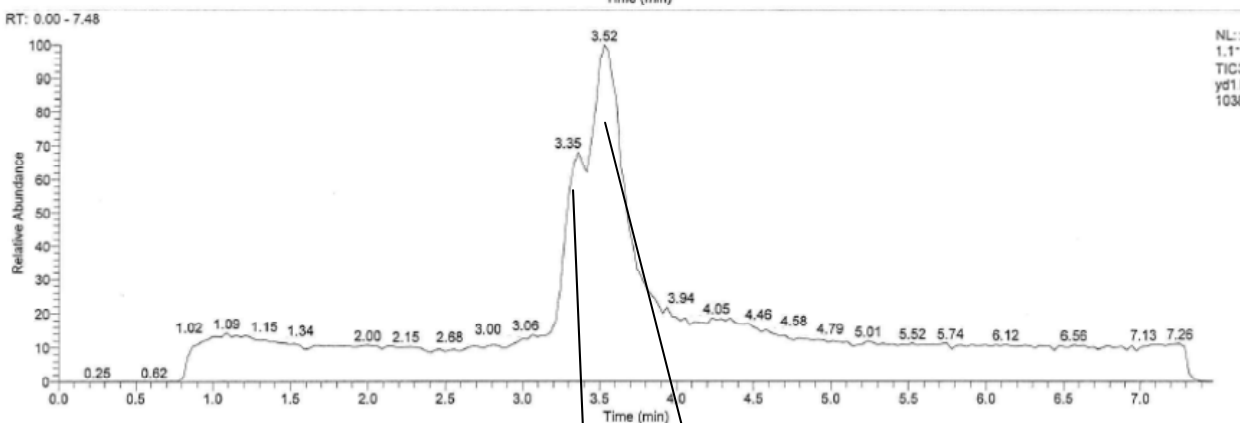

yd1290-103A1 #107-110 RT: 3.30-3.38 AV: 4 NL: 8.61E6  
T: - c ESI Full ms [ 400.00-2000.00]

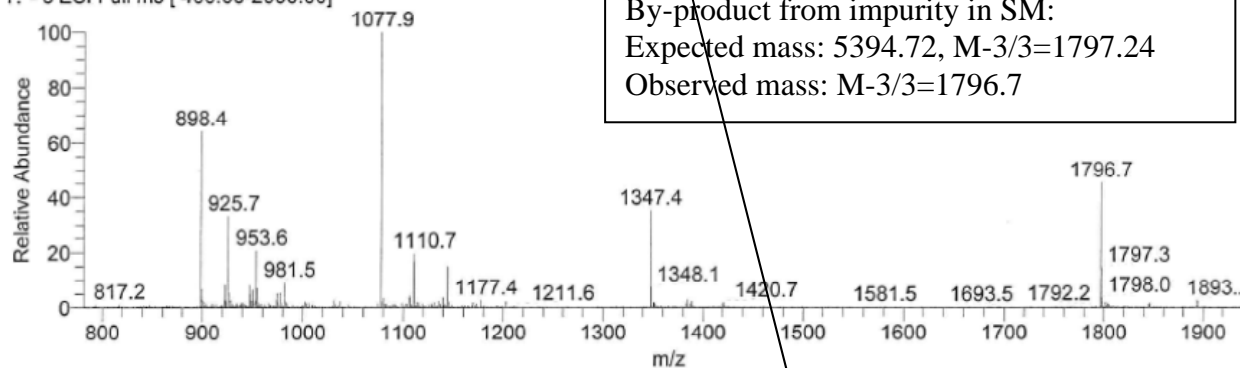

By-product from impurity in SM:  
Expected mass: 5394.72,  $M-3/3=1797.24$   
Observed mass:  $M-3/3=1796.7$

yd1290-103A1 #112-119 RT: 3.44-3.63 AV: 8 NL: 9.73E6  
T: - c ESI Full ms [ 400.00-2000.00]

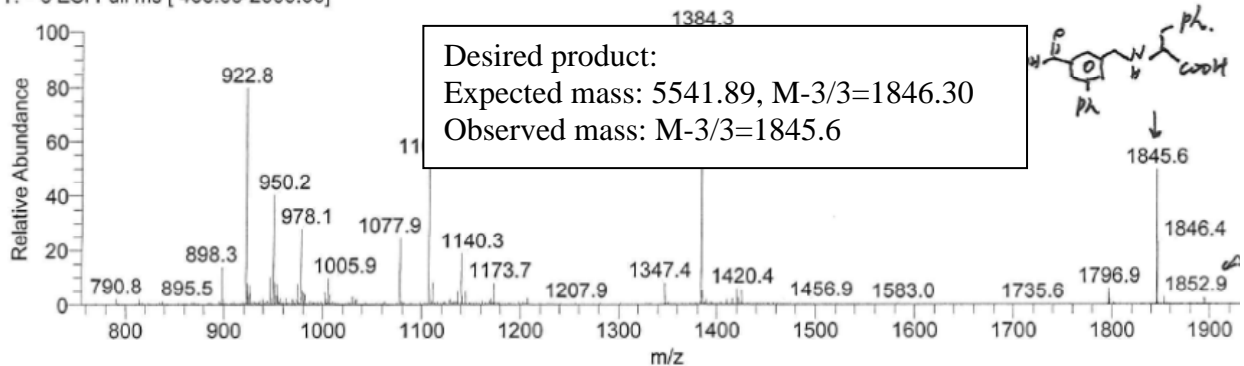

Desired product:  
Expected mass: 5541.89,  $M-3/3=1846.30$   
Observed mass:  $M-3/3=1845.6$

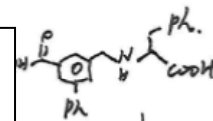

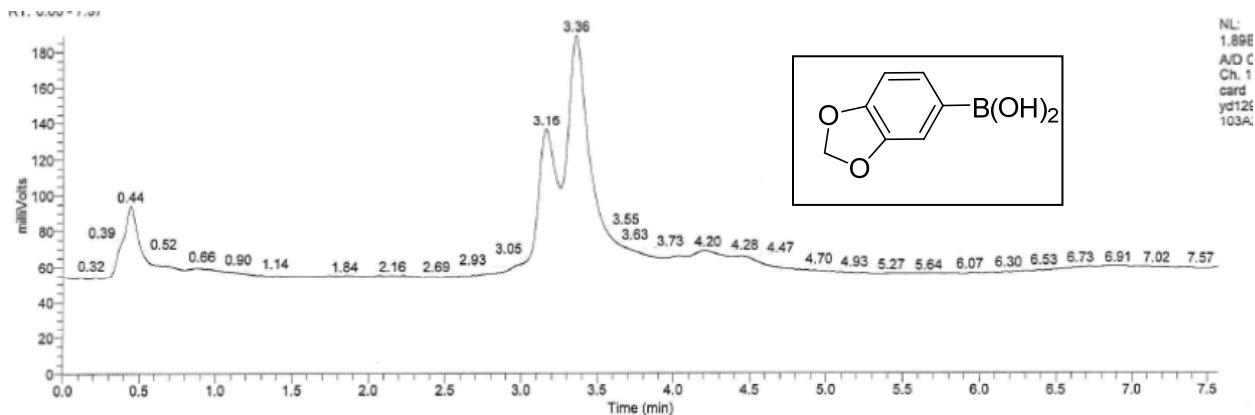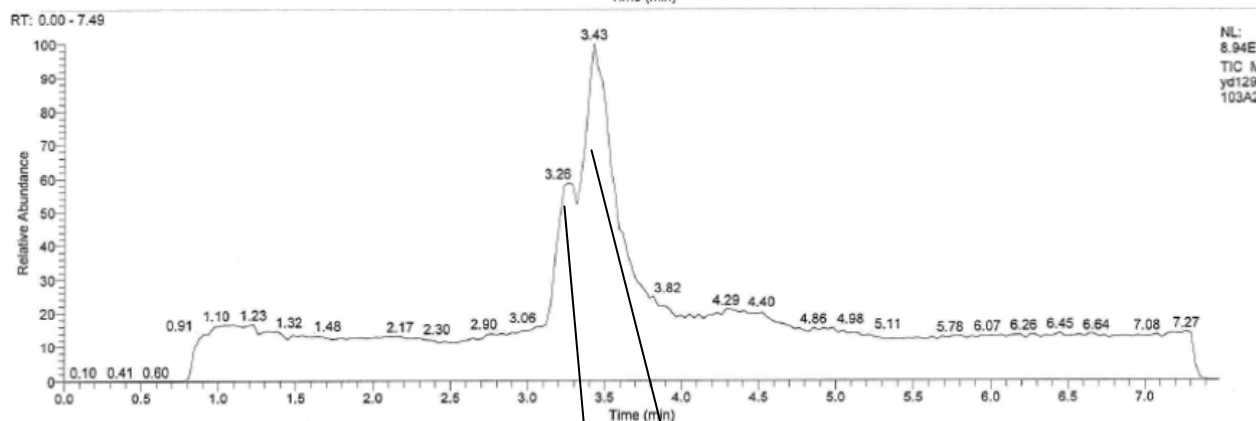

yd1290-103A2 #103-107 RT: 3.21-3.32 AV: 5 NL: 7.60E6  
T: - c ESI Full ms [ 400.00-2000.00]

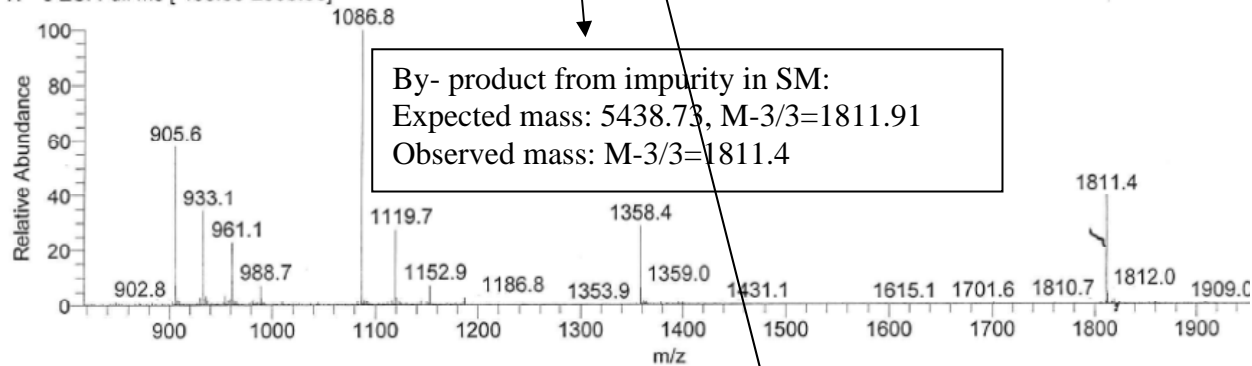

By- product from impurity in SM:  
Expected mass: 5438.73,  $M-3/3=1811.91$   
Observed mass:  $M-3/3=1811.4$

yd1290-103A2 #108-116 RT: 3.34-3.56 AV: 9 NL: 6.94E6  
T: - c ESI Full ms [ 400.00-2000.00]

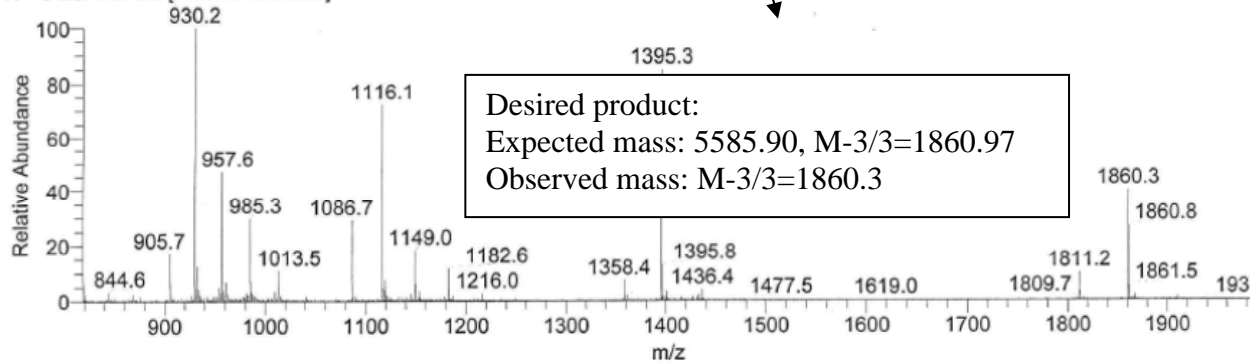

Desired product:  
Expected mass: 5585.90,  $M-3/3=1860.97$   
Observed mass:  $M-3/3=1860.3$

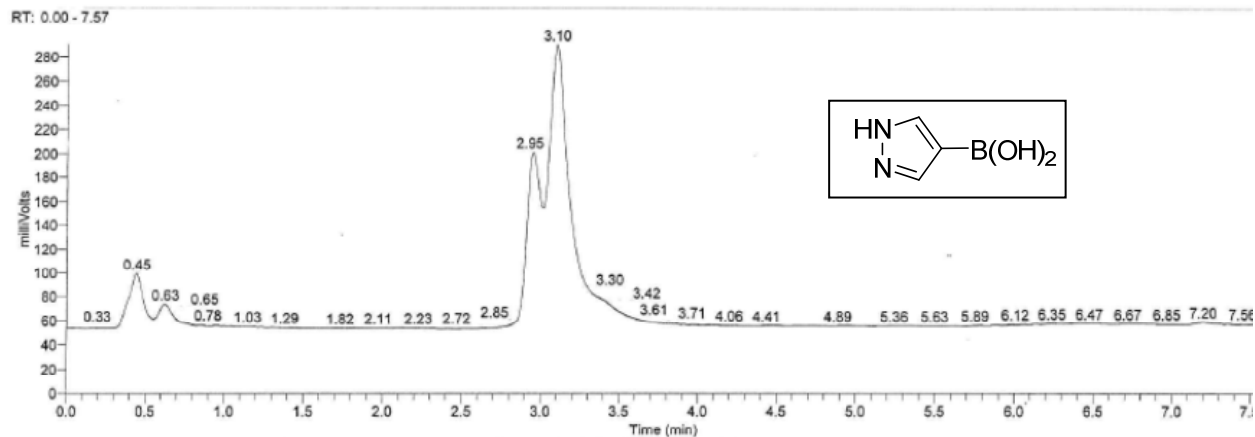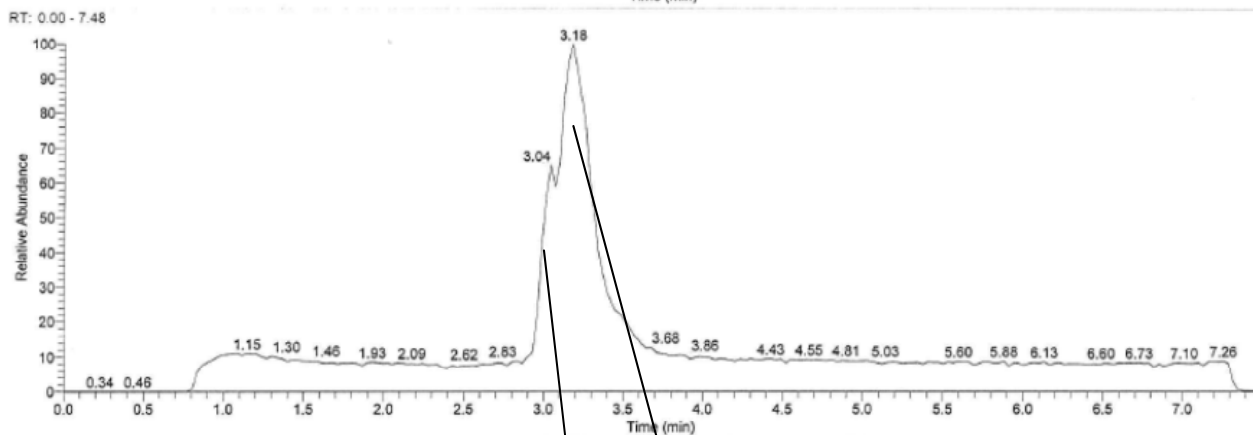

yd1290-103A5 #98-100 RT: 3.01-3.07 AV: 3 NL: 1.62E7  
T: - c ESI Full ms [ 400.00-2000.00]

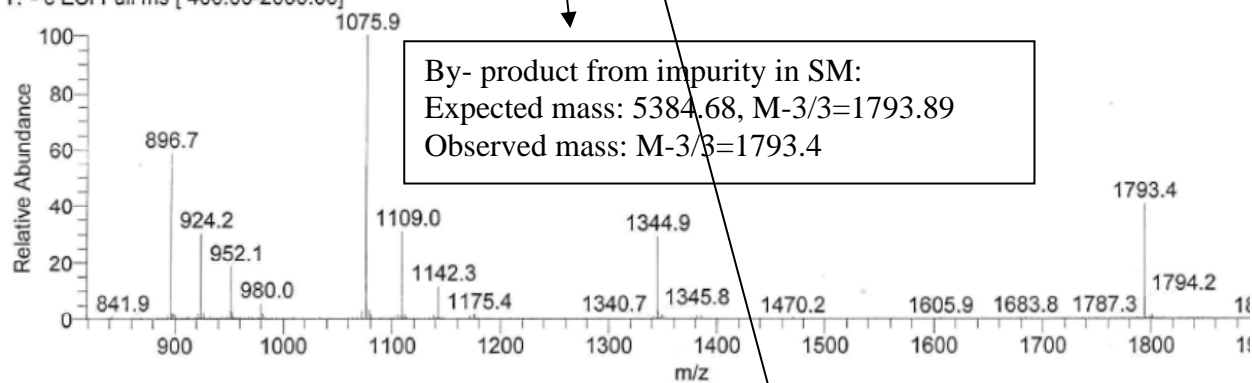

yd1290-103A5 #101-109 RT: 3.10-3.31 AV: 9 NL: 1.15E7  
T: - c ESI Full ms [ 400.00-2000.00]

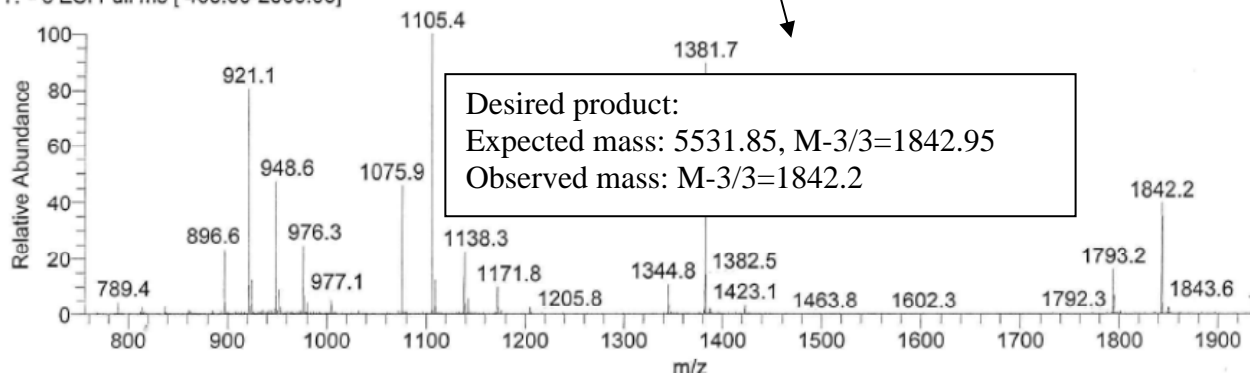

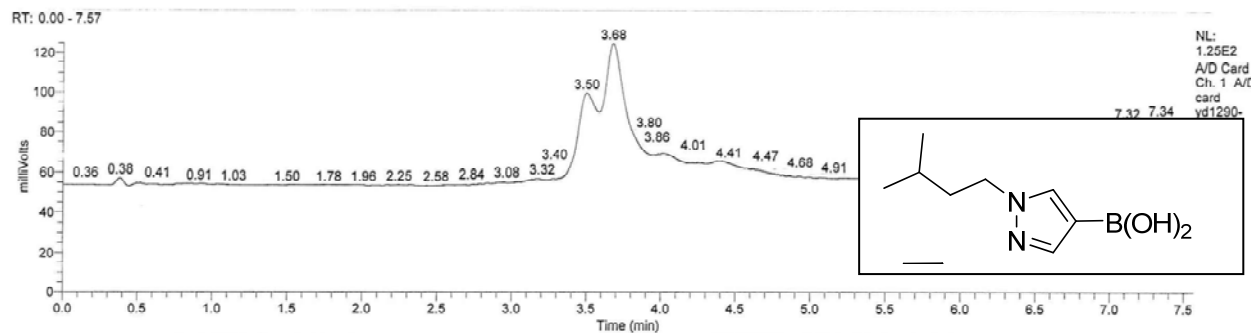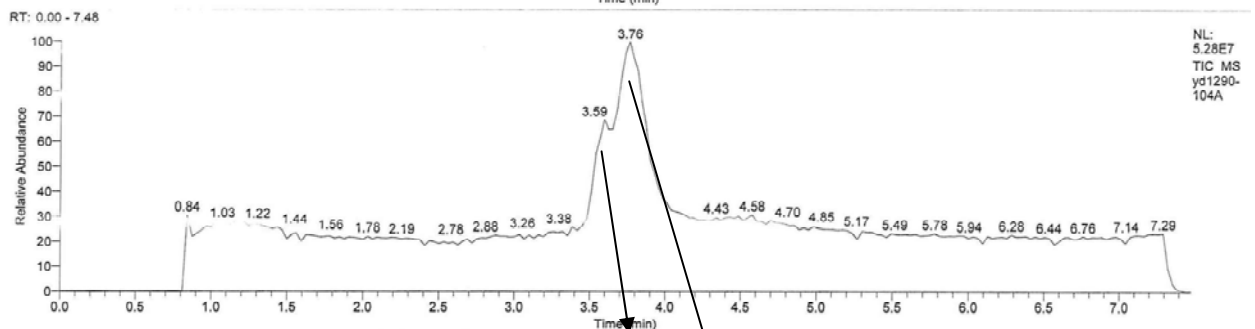

yd1290-104A #113-118 RT: 3.51-3.65 AV: 6 NL: 3.50E6  
T: - c ESI Full ms [ 400.00-2000.00]

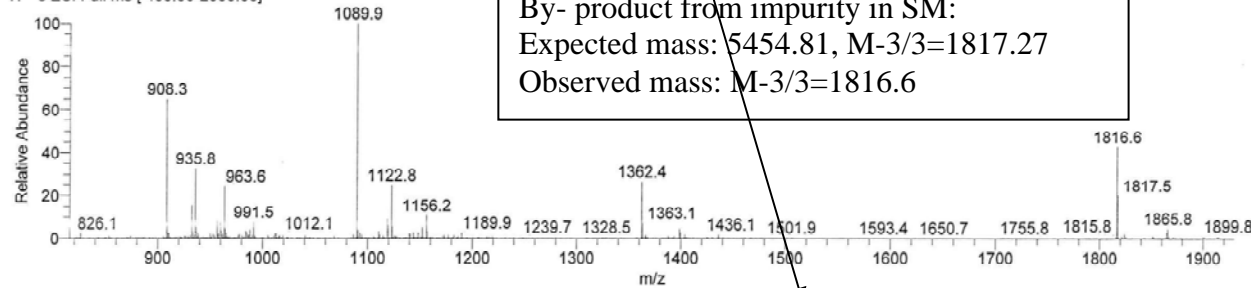

yd1290-104A #119-126 RT: 3.68-3.87 AV: 8 NL: 3.76E6  
T: - c ESI Full ms [ 400.00-2000.00]

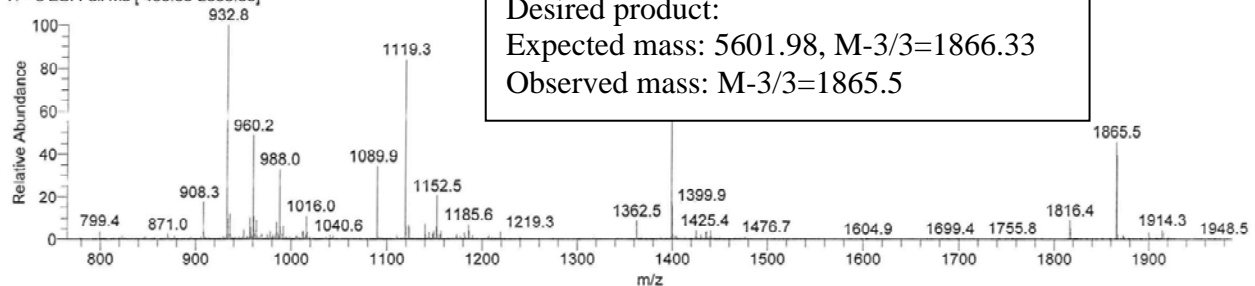

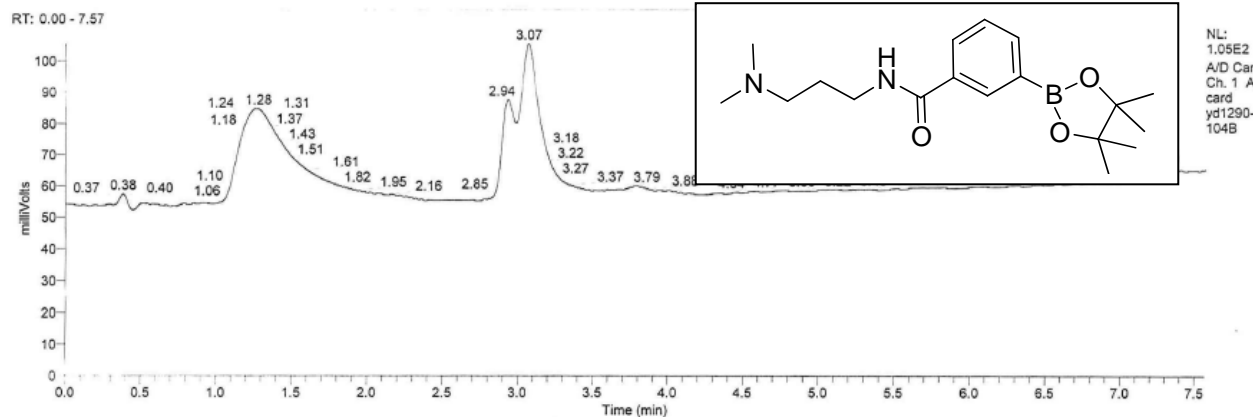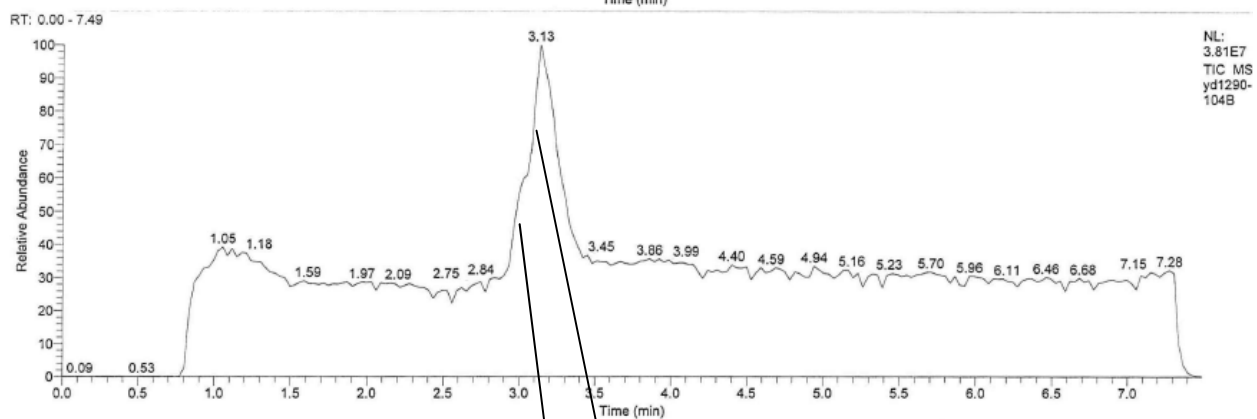

yd1290-104B #96-99 RT: 2.96-3.05 AV: 4 NL: 2.53E6  
T: - c ESI Full ms [ 400.00-2000.00]

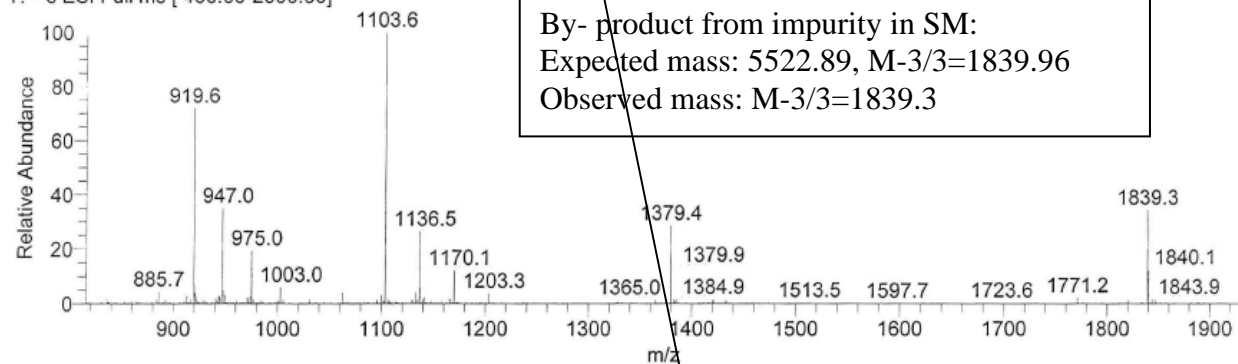

yd1290-104B #100-108 RT: 3.08-3.30 AV: 9 NL: 3.00E6  
T: - c ESI Full ms [ 400.00-2000.00]

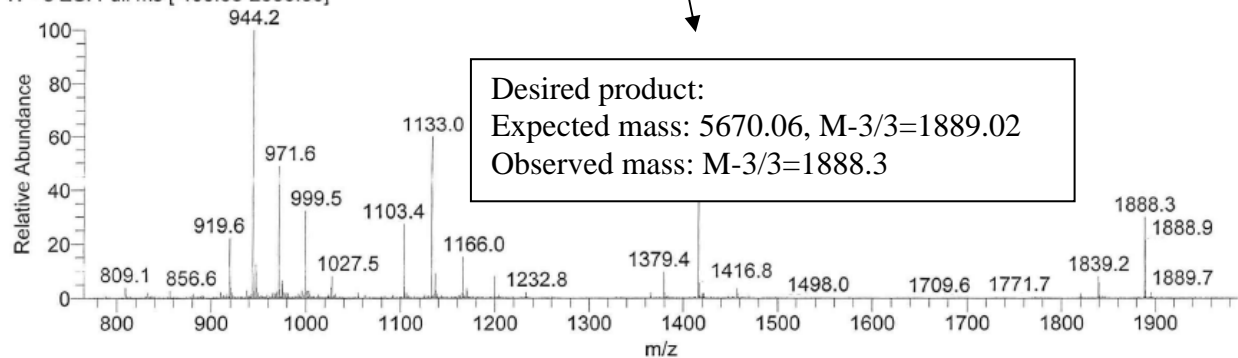

Supplement: Supplementary file 1 [file 3853408]
